# Supplementary material for: Transcriptome Analysis of Streptococcus mutans Quorum Sensing-Mediated Persisters Reveals an Enrichment in Genes Related to Stress Defense Mechanisms
Source: MDPI journal article supplement (doi:10.3390/genes14101887), 2023-09-28
Supplement: s1 [file s1]

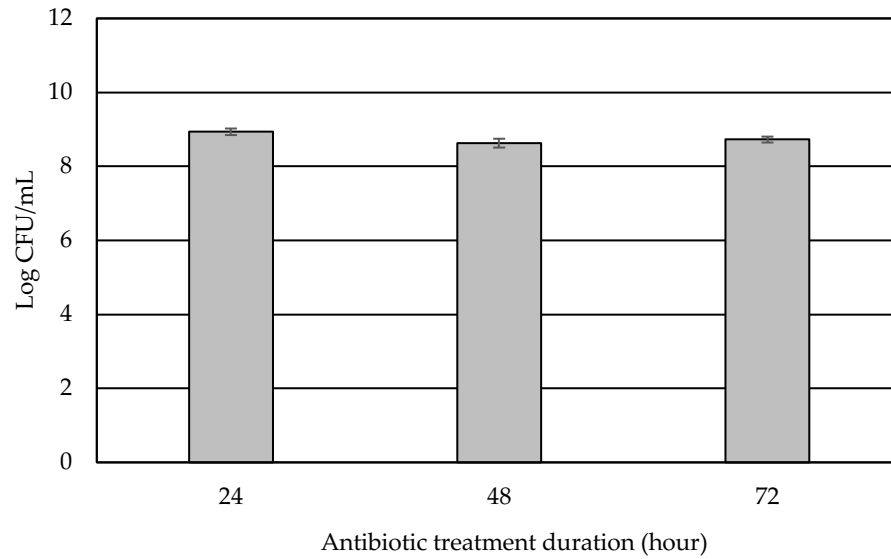

**Figure S1.** Levels of *S. mutans* persisters following treatment with ofloxacin up to 72 h. Stationary grown *S. mutans* UA159 wild-type cells were treated with 20  $\mu\text{g/mL}$  of ofloxacin antibiotic for 24 h, 48 h, and 72 h at 37°C. Collected samples were washed once in phosphate-buffered saline, serially diluted, and plated on THYE agar plates. Viable cell enumeration (CFU/mL) by plate counting was used to determine the number of persisters. Bars presented are the averages and standard deviations of the results from three independent experiments.

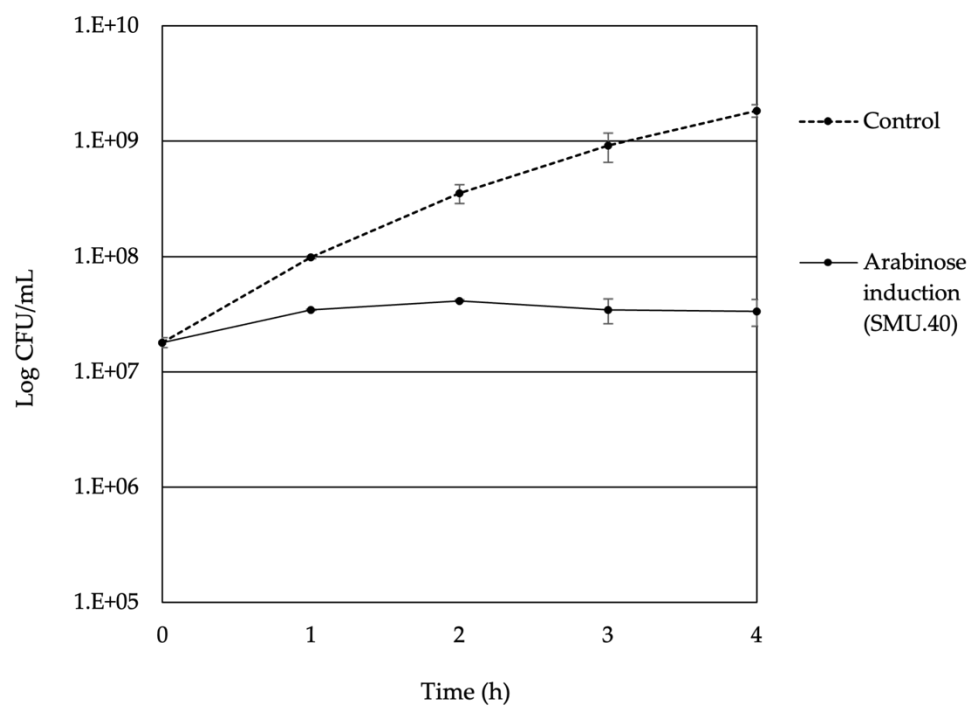

**Figure S2.** Expression of SMU.40 gene (*relE40*) in *E. coli*. Cells of LMG194 containing pBAD-*relE40* were grown to mid-log phase ( $OD_{600}$  of 0.5), at which time 0.2% (*w/v*) arabinose (induction) and 0.2% (*w/v*) glucose (control) were added. After induction, appropriate dilutions were plated on LB agar supplemented with kanamycin (50  $\mu$ g/mL) for determination of the number of colony forming units (CFU) per ml. The curves presented are the averages and standard deviations of the results from three independent cultures.

**Table S1.** Primer pairs used for RT-qPCR.

| Gene ID  | Forward primer (5' – 3') | Reverse primer (5' – 3') |
|----------|--------------------------|--------------------------|
| SMU.22   | AGCAACAGAAGCACAACCATCAG  | CCACCATTACCCCAGTAGTTTCC  |
| SMU.40   | GACAATACAAGACAGCAAAGC    | GCTACAATAATCAGCCCCTC     |
| SMU.124  | TTCTATACTGGCGACGTCTG     | ATTGTTTGCCAACTTCCGTC     |
| SMU.299  | ACGATGGAGCTAATGGCTAT     | AAGCGTAAGCGGCAAAACTT     |
| SMU.423  | TTGAGGGTGGTGGTATGATTAG   | CCAACGACTGGGAGAGTAACTG   |
| SMU.574  | GCTCTCCCTATTGCTCACGCTATC | CCTAAGCCAACACCGATTTCACTC |
| SMU.610  | TTTGCCGATGAAACGACCAC     | TACTCGCACTCCCTTGAGCCTC   |
| SMU.704  | CAGTTCCGCCAAGATAAGAAG    | AGACAAACAGCTAATGCAGCC    |
| SMU.825  | ATGGTCACGTCCAGTGCAAG     | TCGTCTTTGCCCAAGGATAC     |
| SMU.921  | GCCATGGTGTGTAACATCTG     | AATGAGATTACTGGTCACAGAT   |
| SMU.1004 | TTACTGATGACATGGTGGCC     | GCTTGAATAGTTGCAGCTGC     |
| SMU.1114 | ATTGTTGCTCGGGCTCTTCCA    | ATGCGGCTTGTGAGGAGTAACC   |
| SMU.1246 | CGCTGAAGGAGGAGATTTTC     | CGACGACTCGTTTGATTAAGG    |
| SMU.1396 | CGCATTTCTCCTTTTCTTGCCG   | ACAACCTCCTGATGAACCAACGC  |
| SMU.1519 | GACAGGTTCTTCTTTTACTTG    | GGTCCTTAGTTGAAGCATTGG    |
| SMU.1700 | AGTTCCACCAAGAGCCAAACC    | AGATGCAGGGAATTACGACCG    |
| SMU.1877 | CATCAAAGAAGCCAAAGACG     | CCATCACCAATGACAGTGCC     |
| SMU.1915 | GACTTTAAAGAAATTAAGACTG   | AAGCTTGTGTAAAACCTTCTGT   |
| SMU.2061 | GCGAAAGCTCCTCAAGCAAC     | AACTTTGGCATCTCCTGTAGC    |
| SMU.2147 | CACCTGATTCTTTTGTAGCG     | CGGAACCAACTGAGACCAAG     |

**Table S2.** DEGs significantly up-regulated ( $\log_2FC \geq 2$ ) in the persister population. *S. mutans* gene locus tag as in GenBank (UA159 accession no. AE014133).

| Gene ID   | Log <sub>2</sub> FC | Product                                                                                 |
|-----------|---------------------|-----------------------------------------------------------------------------------------|
| SMU.40    | 6.10                | Conserved hypothetical protein                                                          |
| SMU.1072c | 5.38                | Putative acetyltransferase                                                              |
| SMU.1827  | 5.21                | Putative biotin biosynthesis protein                                                    |
| SMU.1396  | 5.14                | Glucan-binding protein C, GpcC                                                          |
| SMU.1489  | 4.90                | Conserved hypothetical protein                                                          |
| SMU.265   | 4.81                | Putative carbamate kinase                                                               |
| SMU.263   | 4.64                | Putative amino acid antiporter                                                          |
| SMU.1488c | 4.49                | Conserved hypothetical protein                                                          |
| SMU.264   | 4.43                | Conserved hypothetical protein                                                          |
| SMU.42    | 4.34                | Conserved hypothetical protein                                                          |
| SMU.124   | 4.27                | Putative transcriptional regulator (MarR family)                                        |
| SMU.262   | 4.21                | Putative ornithine carbamoyltransferase                                                 |
| SMU.1063  | 4.15                | Putative ABC transporter, ATP-binding protein, proline/glycine betaine transport system |
| SMU.1494  | 4.12                | Tagatose-6-phosphate kinase                                                             |
| SMU.1884c | 4.08                | Hypothetical protein                                                                    |
| SMU.1491  | 4.08                | PTS system, lactose-specific enzyme IIBC                                                |
| SMU.1490  | 4.05                | 6-phospho-beta-galactosidase                                                            |
| SMU.706c  | 4.04                | Conserved hypothetical protein                                                          |
| SMU.1493  | 3.95                | Tagatose-1,6-bisphosphate aldolase                                                      |
| SMU.125   | 3.95                | Conserved hypothetical protein                                                          |
| SMU.1492  | 3.92                | PTS system, lactose-specific enzyme IIA                                                 |
| SMU.1495  | 3.88                | Galactose-6-phosphate isomerase, subunit LacB                                           |
| SMU.1149  | 3.85                | Putative transporter, trans-membrane domain bacteriocin immunity protein                |
| SMU.1150  | 3.52                | Hypothetical protein                                                                    |
| SMU.260   | 3.49                | Conserved hypothetical protein                                                          |
| SMU.1062  | 3.49                | Putative ABC transporter, proline/glycine betaine permease protein                      |
| SMU.1357  | 3.44                | Putative transposase fragment                                                           |
| SMU.1284c | 3.39                | Conserved hypothetical protein                                                          |
| SMU.1496  | 3.37                | Galactose-6-phosphate isomerase, subunit LacA                                           |
| SMU.531   | 3.37                | Putative chorismate mutase                                                              |
| SMU.1297  | 3.33                | 3'-phosphoadenosine phosphatase                                                         |
| SMU.2116  | 3.31                | Putative osmoprotectant amino acid ABC transporter, ATP-binding protein                 |
| SMU.1148  | 3.28                | Putative transporter, ATP-binding protein; bacteriocin immunity protein                 |
| SMU.1420  | 3.17                | Putative oxidoreductase                                                                 |
| SMU.2133c | 3.15                | Putative membrane protein                                                               |
| SMU.1286c | 3.09                | Putative permease; multidrug efflux protein                                             |

|           |      |                                                                                     |
|-----------|------|-------------------------------------------------------------------------------------|
| SMU.417   | 3.08 | Conserved hypothetical protein                                                      |
| SMU.1419  | 3.08 | Putative transcriptional regulator                                                  |
| SMU.668c  | 3.06 | Ribonucleotide reductase, large subunit                                             |
| SMU.658   | 2.95 | Conserved hypothetical protein                                                      |
| SMU.2146c | 2.92 | Hypothetical protein                                                                |
| SMU.2117  | 2.91 | Putative osmoprotectant ABC transporter; permease protein                           |
| SMU.1437  | 2.84 | Putative UDP-N-acetylglucosamine 2-epimerase                                        |
| SMU.1175  | 2.82 | Putative sodium/amino acid (alanine) symporter                                      |
| SMU.1237c | 2.75 | Hypothetical protein                                                                |
| SMU.418   | 2.74 | Putative transcription factor NusA                                                  |
| SMU.1649  | 2.70 | Putative exodeoxyribonuclease III                                                   |
| SMU.2147c | 2.68 | Conserved hypothetical protein                                                      |
| SMU.1553c | 2.65 | Hypothetical protein                                                                |
| SMU.667   | 2.65 | Putative ribonucleotide reductase, small subunit                                    |
| SMU.561c  | 2.65 | Putative hydrolase (MutT family)                                                    |
| SMU.953c  | 2.64 | Putative transcriptional regulator/aminotransferase                                 |
| SMU.562   | 2.58 | ATP-dependent protease ClpE                                                         |
| SMU.921   | 2.57 | Putative transcriptional regulator                                                  |
| SMU.1436c | 2.56 | Hypothetical protein                                                                |
| SMU.924   | 2.55 | Thiol peroxidase                                                                    |
| SMU.1259  | 2.54 | Conserved hypothetical protein; possible restriction endonuclease                   |
| SMU.299c  | 2.48 | Putative bacteriocin peptide precursor                                              |
| SMU.1028  | 2.47 | Putative hydrolase or acyltransferase                                               |
| SMU.2109  | 2.46 | Putative MDR permease, possible multidrug efflux pump                               |
| SMU.71    | 2.42 | Putative cation efflux pump (multidrug resistance protein)                          |
| SMU.1036  | 2.40 | Hypothetical protein                                                                |
| SMU.956   | 2.39 | Putative Clp-like ATP-dependent protease, ATP-binding subunit                       |
| SMU.1969c | 2.38 | Putative transcriptional regulator                                                  |
| SMU.419   | 2.37 | Conserved hypothetical protein                                                      |
| SMU.1795c | 2.33 | Conserved hypothetical protein                                                      |
| SMU.1554c | 2.32 | Hypothetical protein                                                                |
| SMU.29    | 2.31 | Putative phosphoribosylaminoimidazole-succinocarboxamide synthase SAICAR synthetase |
| SMU.63c   | 2.29 | Conserved hypothetical protein                                                      |
| SMU.216c  | 2.29 | Hypothetical protein                                                                |
| SMU.1280c | 2.26 | Conserved hypothetical protein                                                      |
| SMU.922   | 2.26 | Putative ABC transporter, ATP-binding protein                                       |
| SMU.1915  | 2.26 | Competence-stimulating peptide, precursor                                           |
| SMU.1519  | 2.25 | Putative amino acid ABC transporter, ATP-binding protein                            |
| SMU.2072c | 2.25 | Conserved hypothetical protein; possible acetyltransferase                          |
| SMU.611   | 2.25 | Putative ATP-dependent RNA helicase, DEAD-box family                                |
| SMU.1621c | 2.25 | Conserved hypothetical protein                                                      |
| SMU.420   | 2.23 | Putative ribosomal protein                                                          |
| SMU.279   | 2.22 | Hypothetical protein                                                                |

|           |      |                                                                                                             |
|-----------|------|-------------------------------------------------------------------------------------------------------------|
| SMU.1515  | 2.22 | Conserved hypothetical protein CovX (VicX)                                                                  |
| SMU.638   | 2.22 | Putative 16S pseudouridylate synthase                                                                       |
| SMU.1236c | 2.21 | Conserved hypothetical protein                                                                              |
| SMU.1790c | 2.20 | Putative transcriptional regulator                                                                          |
| SMU.28    | 2.19 | Putative ATP-binding protein                                                                                |
| SMU.270   | 2.19 | Putative PTS system, membrane component; possible ribulose-monophosphate PTS pathway enzyme IIC             |
| SMU.704c  | 2.19 | Putative autolysin, amidase                                                                                 |
| SMU.524   | 2.19 | Putative ABC transporter, ATP-binding protein                                                               |
| SMU.1791c | 2.18 | Conserved hypothetical protein                                                                              |
| SMU.426   | 2.17 | Copper-transporting ATPase; P-type ATPase                                                                   |
| SMU.2118  | 2.16 | Putative ABC transporter; osmoprotectant-binding protein, glycine betaine/carnitine/choline ABC transporter |
| SMU.211c  | 2.16 | Hypothetical protein                                                                                        |
| SMU.1027  | 2.15 | Putative transcriptional regulator                                                                          |
| SMU.1434c | 2.13 | Putative glycosyltransferase                                                                                |
| SMU.1517  | 2.13 | Putative response regulator CovR (VicR-like protein)                                                        |
| SMU.1761c | 2.12 | Conserved hypothetical protein                                                                              |
| SMU.290   | 2.11 | Conserved hypothetical protein                                                                              |
| SMU.657   | 2.11 | Putative MutG                                                                                               |
| SMU.629   | 2.10 | Putative manganese-type superoxide dismutase, Fe/Mn-SOD                                                     |
| SMU.1438c | 2.09 | Putative Zn-dependent protease                                                                              |
| SMU.1794c | 2.09 | Conserved hypothetical protein                                                                              |
| SMU.407   | 2.09 | Conserved hypothetical protein                                                                              |
| SMU.401c  | 2.08 | Conserved hypothetical protein                                                                              |
| SMU.1753c | 2.08 | Conserved hypothetical protein                                                                              |
| SMU.532   | 2.06 | Putative anthranilate synthase, alpha subunit                                                               |
| SMU.1035  | 2.06 | Putative ABC transporter, ATP-binding protein                                                               |
| SMU.48    | 2.06 | Putative phosphoribosylamine-glycine ligase; phosphoribosyl glycinamide synthetase (GARS)                   |
| SMU.278   | 2.05 | Hypothetical protein                                                                                        |
| SMU.610   | 2.05 | Cell surface antigen I/II                                                                                   |
| SMU.1435c | 2.04 | Hypothetical protein                                                                                        |
| SMU.383c  | 2.04 | Conserved hypothetical protein, putative reductase                                                          |
| SMU.703c  | 2.03 | Conserved hypothetical protein, possible membrane protein                                                   |
| SMU.1657c | 2.03 | Putative nitrogen regulatory protein PII                                                                    |
| SMU.1432c | 2.01 | Putative endoglucanase precursor                                                                            |
| SMU.1703c | 2.01 | Conserved hypothetical protein                                                                              |
| SMU.1865  | 2.00 | Putative A/G-specific DNA glycosylase                                                                       |
| SMU.427   | 2.00 | Putative copper chaperone                                                                                   |
| SMU.1117  | 2.00 | H <sub>2</sub> O-forming NADH oxidase                                                                       |
| SMU.1516  | 2.00 | Putative histidine kinase CovS (VicK-like protein)                                                          |

**Table S3.** DEGs significantly down-regulated ( $\log_2FC \leq -2$ ) in the persister population. *S. mutans* gene locus tag as in GenBank (UA159 accession no. AE014133).

| Gene ID   | Log <sub>2</sub> FC | Product                                                                      |
|-----------|---------------------|------------------------------------------------------------------------------|
| SMU.1001  | -5.20               | Putative DNA processing Smf protein                                          |
| SMU.625   | -5.09               | Putative competence protein                                                  |
| SMU.1956c | -4.99               | Hypothetical protein                                                         |
| SMU.1960c | -4.96               | Putative PTS system, mannose-specific IIB component                          |
| SMU.836   | -4.94               | Hypothetical protein                                                         |
| SMU.1983  | -4.79               | Putative competence protein ComYD                                            |
| SMU.1967  | -4.74               | Putative single-stranded DNA -binding protein                                |
| SMU.1961c | -4.68               | Putative PTS system, sugar-specific enzyme IIA component                     |
| SMU.1906c | -4.65               | Hypothetical protein                                                         |
| SMU.1984  | -4.64               | Putative competence protein ComYC                                            |
| SMU.1905c | -4.63               | Putative bacteriocin secretion protein                                       |
| SMU.1908c | -4.61               | Hypothetical protein                                                         |
| SMU.1958c | -4.57               | Putative PTS system, mannose-specific IIC component                          |
| SMU.1909c | -4.57               | Hypothetical protein                                                         |
| SMU.1957  | -4.54               | Putative PTS system, mannose-specific IID component                          |
| SMU.1981c | -4.53               | Conserved hypothetical protein                                               |
| SMU.626   | -4.50               | Putative competence protein                                                  |
| SMU.1902c | -4.42               | Hypothetical protein                                                         |
| SMU.1980c | -4.42               | Conserved hypothetical protein                                               |
| SMU.877   | -4.39               | Alpha-galactosidase                                                          |
| SMU.1982c | -4.38               | Conserved hypothetical protein                                               |
| SMU.1979c | -4.34               | Conserved hypothetical protein                                               |
| SMU.1985  | -4.32               | Putative ABC transporter ComYB; probably part of the DNA transport machinery |
| SMU.1402c | -4.31               | Conserved hypothetical protein                                               |
| SMU.1904c | -4.29               | Hypothetical protein                                                         |
| SMU.1910c | -4.29               | Hypothetical protein                                                         |
| SMU.539c  | -4.20               | Signal peptidase type IV                                                     |
| SMU.1347c | -4.17               | Conserved hypothetical protein; possible permease                            |
| SMU.837   | -4.07               | Putative reductase                                                           |
| SMU.1404c | -4.07               | Conserved hypothetical protein                                               |
| SMU.1913c | -4.05               | Putative immunity protein, BlpL-like                                         |
| SMU.1405c | -4.00               | Conserved hypothetical protein                                               |
| SMU.769   | -3.95               | Conserved hypothetical protein                                               |
| SMU.1987  | -3.94               | Putative ABC transporter, ATP-binding protein ComYA; late competence gene    |
| SMU.113   | -3.89               | Putative fructose-1-phosphate kinase                                         |
| SMU.878   | -3.88               | Multiple sugar-binding ABC transporter, sugar-binding protein precursor MsmE |
| SMU.1403c | -3.77               | Conserved hypothetical protein                                               |
| SMU.115   | -3.72               | Putative PTS system, fructose-specific IIA component                         |
| SMU.498   | -3.64               | Putative late competence protein                                             |

|           |       |                                                                           |
|-----------|-------|---------------------------------------------------------------------------|
| SMU.499   | -3.59 | Putative late competence protein                                          |
| SMU.879   | -3.57 | Multiple sugar-binding ABC transporter, permease protein MsmF             |
| SMU.1334  | -3.56 | Putative phosphopantetheinyl transferase                                  |
| SMU.151   | -3.55 | Hypothetical protein                                                      |
| SMU.1568  | -3.54 | Putative maltose/maltodextrin ABC transporter, sugar-binding protein MalX |
| SMU.114   | -3.47 | Putative PTS system, fructose-specific IIBC component                     |
| SMU.1978  | -3.44 | Putative acetate kinase                                                   |
| SMU.1336  | -3.41 | Conserved hypothetical protein PksD, involved in polyketide synthesis     |
| SMU.1002  | -3.39 | Putative DNA topoisomerase I                                              |
| SMU.506   | -3.37 | Putative type II restriction endonuclease                                 |
| SMU.116   | -3.34 | Tagatose 1,6-aldolase                                                     |
| SMU.500   | -3.33 | Putative ribosome-associated protein                                      |
| SMU.772   | -3.31 | Glucan-binding protein D with lipase activity; BglB-like protein          |
| SMU.505   | -3.23 | Putative adenine-specific DNA methylase                                   |
| SMU.1055  | -3.21 | Putative DNA repair protein RadC                                          |
| SMU.1365c | -3.18 | Hypothetical protein; possible permease                                   |
| SMU.503c  | -3.15 | Hypothetical protein                                                      |
| SMU.609   | -3.14 | Putative 40K cell wall protein precursor                                  |
| SMU.152   | -3.14 | Hypothetical protein                                                      |
| SMU.1337c | -3.13 | Putative alpha/beta superfamily hydrolase                                 |
| SMU.1340  | -3.11 | Putative surfactin synthetase                                             |
| SMU.881   | -3.09 | Sucrose phosphorylase, GtfA                                               |
| SMU.1003  | -3.08 | Putative glucose-inhibited division protein                               |
| SMU.1338c | -3.07 | Putative permease; possible multidrug-efflux transporter                  |
| SMU.1339  | -3.06 | Putative bacitracin synthetase                                            |
| SMU.154   | -3.05 | 30S ribosomal protein S15                                                 |
| SMU.1335c | -3.05 | Putative enoyl-(acyl-carrier-protein) reductase                           |
| SMU.840c  | -3.02 | Hypothetical protein                                                      |
| SMU.1398  | -2.99 | Putative transcriptional regulator                                        |
| SMU.984   | -2.99 | Hypothetical protein                                                      |
| SMU.1780  | -2.97 | Conserved hypothetical protein                                            |
| SMU.575c  | -2.93 | Putative membrane protein                                                 |
| SMU.150   | -2.87 | Hypothetical protein                                                      |
| SMU.391c  | -2.82 | Conserved hypothetical protein                                            |
| SMU.880   | -2.81 | Multiple sugar-binding ABC transporter, permease protein MsmG             |
| SMU.108   | -2.81 | Hypothetical protein                                                      |
| SMU.1529  | -2.76 | FoF1 membrane-bound proton-translocating ATPase, gamma subunit            |
| SMU.1042  | -2.74 | Conserved hypothetical protein; inner membrane protein                    |
| SMU.574c  | -2.69 | Putative membrane protein                                                 |
| SMU.1361c | -2.64 | Putative transcriptional regulator (TetR family)                          |
| SMU.1534  | -2.63 | FoF1 membrane-bound proton-translocating ATPase, c subunit                |
| SMU.1914c | -2.63 | Hypothetical protein                                                      |



|           |       |                                                                                                                                                 |
|-----------|-------|-------------------------------------------------------------------------------------------------------------------------------------------------|
| SMU.238c  | -2.61 | Putative ABC transporter, ATP-binding protein                                                                                                   |
| SMU.219   | -2.58 | Hypothetical protein                                                                                                                            |
| SMU.186   | -2.58 | Putative metal-dependent transcriptional regulator                                                                                              |
| SMU.1528  | -2.56 | FoF1 membrane-bound proton-translocating ATPase, beta subunit                                                                                   |
| SMU.1088  | -2.56 | Putative thiamine biosynthesis lipoprotein                                                                                                      |
| SMU.1531  | -2.54 | FoF1 membrane-bound proton-translocating ATPase, delta subunit                                                                                  |
| SMU.886   | -2.53 | Galactokinase, GalK                                                                                                                             |
| SMU.1900  | -2.53 | Conserved hypothetical protein                                                                                                                  |
| SMU.1341c | -2.51 | Putative gramicidin S synthetase                                                                                                                |
| SMU.889   | -2.48 | Putative penicillin-binding protein, class C; fmt-like protein                                                                                  |
| SMU.1424  | -2.47 | Putative dihydrolipoamide dehydrogenase                                                                                                         |
| SMU.986c  | -2.45 | Hypothetical protein                                                                                                                            |
| SMU.423   | -2.44 | Hypothetical protein                                                                                                                            |
| SMU.936   | -2.43 | Putative amino acid ABC transporter, ATP-binding protein                                                                                        |
| SMU.1533  | -2.43 | FoF1 membrane-bound proton-translocating ATPase, a subunit                                                                                      |
| SMU.1530  | -2.41 | FoF1 membrane-bound proton-translocating ATPase, alpha subunit                                                                                  |
| SMU.1090  | -2.35 | Conserved hypothetical protein                                                                                                                  |
| SMU.1575c | -2.35 | Hypothetical protein                                                                                                                            |
| SMU.2127  | -2.33 | Putative succinate semialdehyde dehydrogenase                                                                                                   |
| SMU.1070c | -2.32 | Conserved hypothetical protein                                                                                                                  |
| SMU.1152c | -2.32 | Conserved hypothetical protein                                                                                                                  |
| SMU.1160c | -2.32 | Hypothetical protein                                                                                                                            |
| SMU.1019  | -2.31 | Putative citrate lyase, gamma-subunit                                                                                                           |
| SMU.1532  | -2.31 | FoF1 membrane-bound proton-translocating ATPase, b subunit                                                                                      |
| SMU.1342  | -2.31 | Putative bacitracin synthetase 1; BacA                                                                                                          |
| SMU.1125c | -2.31 | Conserved hypothetical protein                                                                                                                  |
| SMU.184   | -2.29 | Putative ABC transporter, metal binding lipoprotein; surface adhesin precursor; saliva-binding protein; lipoprotein receptor LraI (LraI family) |
| SMU.888   | -2.28 | UDP-galactose 4-epimerase, GalE                                                                                                                 |
| SMU.237c  | -2.27 | Putative integral membrane protein                                                                                                              |
| SMU.1293c | -2.27 | Conserved hypothetical protein                                                                                                                  |
| SMU.1023  | -2.27 | Putative pyruvate carboxylase/oxaloacetate decarboxylase, alpha subunit                                                                         |
| SMU.1343c | -2.26 | Putative polyketide synthase                                                                                                                    |
| SMU.1367c | -2.26 | Conserved hypothetical protein                                                                                                                  |
| SMU.1569  | -2.25 | Putative maltose/maltodextrin ABC transporter, permease protein MalF                                                                            |
| SMU.78    | -2.24 | Fructan hydrolase; exp-beta-D-fructosidase; fructanase, FruA                                                                                    |
| SMU.1021  | -2.24 | Putative citrate lyase, alpha subunit                                                                                                           |
| SMU.1126  | -2.21 | Putative pantothenate kinase                                                                                                                    |
| SMU.1564  | -2.21 | Putative glycogen phosphorylase                                                                                                                 |
| SMU.1570  | -2.21 | Putative maltose/maltodextrin ABC transporter, MalG permease                                                                                    |
| SMU.1124  | -2.19 | Putative pyrimidine-nucleoside phosphorylase                                                                                                    |

|           |       |                                                                                                    |
|-----------|-------|----------------------------------------------------------------------------------------------------|
| SMU.1017  | -2.18 | Putative oxaloacetate decarboxylase, sodium ion pump subunit                                       |
| SMU.1153c | -2.18 | Hypothetical protein                                                                               |
| SMU.883   | -2.17 | Dextran glucosidase DexB                                                                           |
| SMU.1016  | -2.17 | Putative acetyl-CoA carboxylase, biotin carboxyl carrier subunit                                   |
| SMU.1067c | -2.16 | Putative ABC transporter, permease protein                                                         |
| SMU.1344c | -2.15 | Putative malonyl-CoA acyl-carrier-protein transacylase                                             |
| SMU.1423  | -2.15 | Putative pyruvate dehydrogenase, TPP-dependent E1 component alpha-subunit                          |
| SMU.110   | -2.12 | Putative transcriptional regulator MutR                                                            |
| SMU.1022  | -2.12 | Conserved hypothetical protein, CitG-like protein                                                  |
| SMU.1089  | -2.11 | Conserved hypothetical protein                                                                     |
| SMU.1843  | -2.11 | Sucrose-6-phosphate hydrolase                                                                      |
| SMU.2086  | -2.11 | Putative competence and damage inducible protein CinA                                              |
| SMU.882   | -2.10 | Multiple sugar-binding ABC transporter, ATP-binding protein, MsmK                                  |
| SMU.352   | -2.08 | Putative ribulose-phosphate-3-epimerase                                                            |
| SMU.1562  | -2.08 | Putative potassium uptake protein TrkA                                                             |
| SMU.1725  | -2.07 | Putative acylphosphatase                                                                           |
| SMU.1509  | -2.06 | Putative transcriptional regulator                                                                 |
| SMU.804   | -2.05 | Hypothetical protein                                                                               |
| SMU.236c  | -2.04 | Putative transcriptional regulator                                                                 |
| SMU.182   | -2.03 | Putative ABC transporter, ATP-binding protein; possible iron and/or manganese ABC transport system |
| SMU.1041  | -2.02 | Conserved hypothetical protein; inner membrane protein                                             |
| SMU.1069c | -2.02 | Hypothetical protein                                                                               |
| SMU.934   | -2.02 | Putative amino acid ABC transporter, permease protein                                              |
| SMU.1652  | -2.02 | Putative methylated-DNA-protein-cysteine-S-methyltransferase                                       |
| SMU.1538  | -2.02 | Putative glucose-1-phosphate adenylyltransferase; ADP-glucose pyrophosphorylase                    |
| SMU.1527  | -2.01 | FoF1 membrane-bound proton-translocating ATPase, epsilon subunit                                   |
| SMU.935   | -2.01 | Putative amino acid ABC transporter, permease protein                                              |

**Table S4.** Complete RNA-seq data. CSP-induced persisters vs. CSP-induced normal stationary cells.  
Log2FC: Log2(fold-change); padj: adjusted *p*-value

| Locus   | Coordinates             | Gene biotype   | Log2FC       | padj        |
|---------|-------------------------|----------------|--------------|-------------|
| SMU.01  | NC_004350.2:194-1552    | protein_coding | 0.506896414  | 1.5649E-05  |
| SMU.02  | NC_004350.2:1708-2844   | protein_coding | 0.234655414  | 0.048053706 |
| SMU.05  | NC_004350.2:3106-3297   | protein_coding | 0.094768804  | 0.677719422 |
| SMU.06  | NC_004350.2:3461-4576   | protein_coding | 1.219955399  | 2.14287E-17 |
| SMU.07  | NC_004350.2:4663-5232   | protein_coding | 0.525365857  | 0.002423787 |
| SMU.08  | NC_004350.2:5225-8722   | protein_coding | -0.066798002 | 0.610544656 |
| SMU.09  | NC_004350.2:8852-9124   | protein_coding | -0.688936079 | 0.000567312 |
| SMU.10  | NC_004350.2:9111-9482   | protein_coding | 0.829399102  | 0.009598545 |
| SMU.11  | NC_004350.2:9482-9601   | protein_coding | 0.653913204  | 0.037076806 |
| SMU.12  | NC_004350.2:9611-10846  | protein_coding | -0.377248509 | 0.032277387 |
| SMU.13  | NC_004350.2:10843-12114 | protein_coding | -0.626948684 | 1.43675E-06 |
| SMU.14  | NC_004350.2:12118-12660 | protein_coding | 1.151203326  | 9.5319E-16  |
| SMU.15  | NC_004350.2:12682-14652 | protein_coding | 1.444726037  | 4.84871E-62 |
| SMU.16  | NC_004350.2:15140-16555 | protein_coding | 1.881246307  | 3.223E-28   |
| SMU_r01 | NC_004350.2:16870-18426 | rRNA           | -1.428382196 | 0.61278516  |
| SMU_t01 | NC_004350.2:18486-18558 | tRNA           | NA           | NA          |
| SMU_r02 | NC_004350.2:18815-21715 | rRNA           | -0.406069788 | 0.18656709  |
| SMU_r03 | NC_004350.2:21898-22013 | rRNA           | NA           | NA          |
| SMU_t02 | NC_004350.2:22018-22090 | tRNA           | NA           | NA          |
| SMU_t03 | NC_004350.2:22120-22192 | tRNA           | NA           | NA          |
| SMU_t04 | NC_004350.2:22220-22292 | tRNA           | 0            | 1           |
| SMU_t05 | NC_004350.2:22302-22383 | tRNA           | NA           | NA          |
| SMU_t06 | NC_004350.2:22398-22470 | tRNA           | 0            | 1           |
| SMU_t07 | NC_004350.2:22473-22544 | tRNA           | NA           | NA          |
| SMU_t08 | NC_004350.2:22552-22637 | tRNA           | -0.997655193 | 0.209439724 |
| SMU_t09 | NC_004350.2:22651-22724 | tRNA           | 2.895446292  | 0.014365303 |
| SMU_t10 | NC_004350.2:22778-22851 | tRNA           | -1.42837471  | 0.762676718 |
| SMU_t11 | NC_004350.2:22857-22930 | tRNA           | 2.300468776  | 0.002778814 |
| SMU_t12 | NC_004350.2:22954-23027 | tRNA           | 2.359466003  | 0.363739402 |
| SMU_t13 | NC_004350.2:23042-23131 | tRNA           | 0.897665366  | 0.617208004 |
| SMU_t14 | NC_004350.2:23144-23217 | tRNA           | NA           | NA          |
| SMU_t15 | NC_004350.2:23227-23299 | tRNA           | -0.468642642 | 0.786805024 |
| SMU_t16 | NC_004350.2:23306-23376 | tRNA           | 3.391819067  | 0.037584987 |
| SMU_t17 | NC_004350.2:23411-23484 | tRNA           | NA           | NA          |
| SMU_t18 | NC_004350.2:23494-23581 | tRNA           | 4.489471836  | 0.000632234 |
| SMU.20  | NC_004350.2:23646-24464 | protein_coding | -0.174138234 | 0.399001361 |
| SMU.21  | NC_004350.2:24466-24972 | protein_coding | -0.667156285 | 0.256383213 |
| SMU.22  | NC_004350.2:25082-26377 | protein_coding | 0.953292123  | 4.49382E-27 |
| SMU.23  | NC_004350.2:26502-27470 | protein_coding | 0.314667525  | 0.028845002 |
| SMU.24  | NC_004350.2:27559-28734 | protein_coding | -0.719232816 | 4.10732E-07 |
| SMU.25  | NC_004350.2:28724-29479 | protein_coding | -1.014410645 | 1.54899E-14 |
| SMU.26  | NC_004350.2:29687-30685 | protein_coding | -0.121672493 | 0.42995767  |
| SMU.27  | NC_004350.2:30687-30935 | protein_coding | 0.486720809  | 0.245851465 |
| SMU.28  | NC_004350.2:31136-31744 | protein_coding | 2.194602103  | 0.00028616  |
| SMU.29  | NC_004350.2:31867-32574 | protein_coding | 2.310525143  | 1.15025E-12 |
| SMU.30  | NC_004350.2:32584-36309 | protein_coding | 1.392738699  | 4.95234E-24 |
| SMU.31  | NC_004350.2:36331-36951 | protein_coding | 0.876836794  | 0.000394114 |
| SMU.32  | NC_004350.2:36977-38416 | protein_coding | 1.243331917  | 1.92866E-20 |
| NA      | NC_004350.2:38429-38914 | protein_coding | 1.029412615  | 3.99288E-06 |
| SMU.34  | NC_004350.2:38960-39982 | protein_coding | 1.227149208  | 2.14978E-13 |
| SMU.35  | NC_004350.2:39982-40536 | protein_coding | 0.959937787  | 1.71778E-08 |
| SMU.36  | NC_004350.2:40643-41350 | protein_coding | 1.096280026  | 1.75293E-13 |
| SMU.37  | NC_004350.2:41392-42939 | protein_coding | 1.376050354  | 1.10136E-23 |
| SMU.38c | NC_004350.2:43122-43664 | protein_coding | 1.14896425   | 0.00017129  |
| SMU.39  | NC_004350.2:43832-44341 | protein_coding | 1.101871596  | 0.000905985 |

|         |                           |                |              |             |
|---------|---------------------------|----------------|--------------|-------------|
| SMU.40  | NC_004350.2:44518-44679   | protein_coding | 6.104168439  | 3.24398E-08 |
| SMU.42  | NC_004350.2:44831-45709   | protein_coding | 4.342853329  | 3.08473E-57 |
| SMU.43  | NC_004350.2:45781-47160   | protein_coding | -0.997494565 | 3.67499E-08 |
| SMU.45  | NC_004350.2:47171-49570   | pseudogene     | -1.224871695 | 1.07956E-14 |
| SMU.46  | NC_004350.2:49572-50207   | protein_coding | -0.894602477 | 3.0943E-06  |
| SMU.47  | NC_004350.2:50207-50815   | protein_coding | -1.059086339 | 4.1841E-08  |
| SMU.48  | NC_004350.2:51039-52298   | protein_coding | 2.059910766  | 1.50414E-61 |
| SMU.49  | NC_004350.2:52358-53539   | protein_coding | 1.727532449  | 2.21644E-46 |
| SMU.50  | NC_004350.2:53850-54350   | protein_coding | 1.601802783  | 6.95179E-27 |
| SMU.51  | NC_004350.2:54337-55428   | protein_coding | 1.702026752  | 6.76209E-51 |
| SMU.52  | NC_004350.2:55428-56093   | protein_coding | 1.268692204  | 1.88248E-18 |
| SMU.53  | NC_004350.2:56109-56328   | pseudogene     | 1.487712352  | 8.02469E-09 |
| SMU.54  | NC_004350.2:56331-57023   | protein_coding | 1.737178359  | 7.06394E-23 |
| SMU.55  | NC_004350.2:57125-57388   | protein_coding | 1.275015102  | 2.55254E-05 |
| NA      | NC_004350.2:57408-57633   | pseudogene     | 1.662892732  | 0.01007959  |
| SMU.58  | NC_004350.2:57639-58934   | protein_coding | 1.862868834  | 3.04842E-50 |
| SMU.59  | NC_004350.2:59244-60542   | protein_coding | 1.027672586  | 1.25807E-14 |
| SMU.60  | NC_004350.2:60562-61248   | protein_coding | -1.006999693 | 8.35671E-08 |
| SMU.61  | NC_004350.2:61631-62545   | protein_coding | -0.06853813  | 0.692862725 |
| SMU.63c | NC_004350.2:63079-64920   | protein_coding | 2.291213335  | 2.5372E-103 |
| SMU.64  | NC_004350.2:65256-66251   | protein_coding | -0.657922935 | 3.25138E-07 |
| SMU.65  | NC_004350.2:66289-66714   | protein_coding | -0.361999928 | 0.043742455 |
| SMU.66  | NC_004350.2:66779-67162   | protein_coding | -0.802593982 | 1.75911E-09 |
| SMU.67  | NC_004350.2:67159-68949   | protein_coding | -1.112633769 | 1.44929E-38 |
| SMU.70  | NC_004350.2:69631-71115   | protein_coding | 0.684590447  | 7.13219E-08 |
| SMU.71  | NC_004350.2:71571-72872   | protein_coding | 2.420568229  | 2.27909E-25 |
| SMU.72  | NC_004350.2:73231-73497   | protein_coding | 1.577650476  | 9.18828E-07 |
| SMU.73  | NC_004350.2:73517-74854   | protein_coding | 1.367637239  | 1.2528E-26  |
| SMU.74  | NC_004350.2:74927-75637   | protein_coding | -0.039901145 | 0.856076894 |
| SMU.75  | NC_004350.2:75621-76370   | protein_coding | 0.218507275  | 0.072463917 |
| SMU.76  | NC_004350.2:76374-76961   | protein_coding | 0.135095897  | 0.494437927 |
| SMU.78  | NC_004350.2:77576-81847   | protein_coding | -2.241070253 | 1.2551E-109 |
| SMU.79  | NC_004350.2:81918-83477   | protein_coding | -1.457632591 | 4.98022E-19 |
| SMU.80  | NC_004350.2:83652-84686   | protein_coding | 0.650012375  | 2.13084E-10 |
| SMU.81  | NC_004350.2:84729-85268   | protein_coding | 0.490919911  | 1.86451E-05 |
| SMU.82  | NC_004350.2:85642-87480   | protein_coding | 0.219172228  | 0.025287386 |
| SMU.83  | NC_004350.2:88008-89141   | protein_coding | 0.859657339  | 6.32471E-19 |
| SMU.84  | NC_004350.2:89443-90192   | protein_coding | 0.336280915  | 0.005252546 |
| SMU.85  | NC_004350.2:90182-90949   | protein_coding | -0.076062407 | 0.601265684 |
| SMU.86  | NC_004350.2:90936-91400   | protein_coding | -0.434234092 | 0.008896365 |
| SMU.87  | NC_004350.2:91445-92008   | protein_coding | -0.378306682 | 0.008362264 |
| SMU.88c | NC_004350.2:92179-93036   | protein_coding | -0.764015703 | 5.14384E-05 |
| SMU.89c | NC_004350.2:93254-94063   | protein_coding | -1.057474806 | 0.00077476  |
| SMU.91  | NC_004350.2:94301-95584   | protein_coding | 0.502878495  | 0.00013247  |
| SMU.96  | NC_004350.2:97086-97670   | protein_coding | -0.073269066 | 0.73483946  |
| SMU.97  | NC_004350.2:97804-99414   | protein_coding | 0.829397876  | 5.17527E-14 |
| SMU_t19 | NC_004350.2:100332-100417 | tRNA           | 0.863412627  | 0.417254855 |
| SMU.99  | NC_004350.2:100574-101455 | protein_coding | -1.435450971 | 2.64285E-54 |
| SMU.100 | NC_004350.2:101780-102271 | protein_coding | -1.080214207 | 3.83854E-05 |
| SMU.101 | NC_004350.2:102284-103081 | protein_coding | -1.166416572 | 4.61905E-11 |
| SMU.102 | NC_004350.2:103071-103892 | protein_coding | -1.44192889  | 1.74669E-28 |
| SMU.103 | NC_004350.2:103889-104305 | protein_coding | -1.390718636 | 2.9315E-15  |
| SMU.104 | NC_004350.2:104305-106500 | protein_coding | -1.613302613 | 1.1902E-42  |
| SMU.105 | NC_004350.2:106501-107499 | protein_coding | -1.435193443 | 1.02811E-29 |
| NA      | NC_004350.2:107595-108316 | pseudogene     | 1.862004168  | 0.003639956 |
| SMU_t20 | NC_004350.2:108558-108630 | tRNA           | 2.906532263  | 0.05311045  |
| NA      | NC_004350.2:108744-108809 | pseudogene     | 2.417322935  | 0.239205263 |
| SMU.109 | NC_004350.2:109582-110682 | protein_coding | -1.716755212 | 1.29341E-20 |
| SMU.110 | NC_004350.2:110824-111684 | protein_coding | -2.116147919 | 1.07294E-28 |

|          |                           |                |              |             |
|----------|---------------------------|----------------|--------------|-------------|
| SMU.112c | NC_004350.2:111945-112694 | protein_coding | -0.138941604 | 0.444714757 |
| SMU.113  | NC_004350.2:112823-113755 | protein_coding | -3.889525459 | 2.6205E-91  |
| SMU.114  | NC_004350.2:113760-115160 | protein_coding | -3.468219145 | 2.2187E-175 |
| SMU.115  | NC_004350.2:115175-115627 | protein_coding | -3.719617768 | 1.16534E-71 |
| SMU.116  | NC_004350.2:115645-116634 | protein_coding | -3.33651666  | 1.2483E-118 |
| SMU.117c | NC_004350.2:116735-118090 | protein_coding | 1.018315036  | 7.57426E-05 |
| SMU.118c | NC_004350.2:118705-119547 | protein_coding | 0.909207952  | 4.36096E-10 |
| SMU.119  | NC_004350.2:119558-120676 | protein_coding | 1.393682113  | 3.94587E-15 |
| SMU.120  | NC_004350.2:121103-121291 | protein_coding | 0.959035633  | 0.012615389 |
| SMU.121  | NC_004350.2:121344-122672 | protein_coding | 1.663208295  | 1.3907E-07  |
| SMU.123  | NC_004350.2:122905-127302 | protein_coding | 0.057268803  | 0.584680127 |
| SMU.124  | NC_004350.2:127526-127954 | protein_coding | 4.273784616  | 2.0742E-237 |
| SMU.125  | NC_004350.2:128033-128587 | protein_coding | 3.949166798  | 1.1E-221    |
| SMU.127  | NC_004350.2:128963-129958 | protein_coding | 1.46787258   | 1.87823E-27 |
| SMU.128  | NC_004350.2:130108-131103 | protein_coding | 1.320809664  | 1.40155E-16 |
| SMU.129  | NC_004350.2:131203-132570 | protein_coding | 1.030785028  | 2.11657E-16 |
| SMU.130  | NC_004350.2:132644-134389 | protein_coding | 1.026983537  | 3.47226E-17 |
| SMU.131  | NC_004350.2:134495-135484 | protein_coding | 0.86321659   | 3.90295E-13 |
| SMU.132  | NC_004350.2:135749-136885 | protein_coding | 1.341135825  | 1.08998E-24 |
| SMU.133c | NC_004350.2:137008-138402 | protein_coding | -0.128617379 | 0.66386045  |
| SMU.134  | NC_004350.2:138583-139206 | protein_coding | 0.579346155  | 0.114518575 |
| SMU.135  | NC_004350.2:139471-140364 | protein_coding | -0.234556697 | 0.255078947 |
| SMU.136c | NC_004350.2:140554-140907 | protein_coding | -1.083443067 | 1.22239E-06 |
| SMU.137  | NC_004350.2:141022-142644 | protein_coding | -1.027057404 | 1.40183E-22 |
| SMU.138  | NC_004350.2:142800-143744 | protein_coding | -0.693751731 | 1.85616E-06 |
| SMU.139  | NC_004350.2:143865-145049 | protein_coding | -0.69456944  | 4.87905E-08 |
| SMU.140  | NC_004350.2:145067-146428 | protein_coding | -0.735525133 | 1.17222E-12 |
| SMU.141  | NC_004350.2:146412-147131 | protein_coding | -0.688623831 | 3.50639E-11 |
| SMU.143c | NC_004350.2:147295-147909 | protein_coding | 0.951881266  | 7.84913E-14 |
| SMU.144c | NC_004350.2:147984-148631 | protein_coding | 1.288131997  | 6.51331E-18 |
| SMU.145  | NC_004350.2:148736-149920 | protein_coding | 1.772768953  | 4.25364E-16 |
| SMU.148  | NC_004350.2:150120-152789 | protein_coding | -1.669951175 | 6.16031E-88 |
| NA       | NC_004350.2:152964-153432 | pseudogene     | -2.588839594 | 4.82974E-97 |
| SMU.150  | NC_004350.2:153813-154016 | protein_coding | -2.86569488  | 1.35682E-53 |
| SMU.151  | NC_004350.2:154046-154261 | protein_coding | -3.554245697 | 6.0815E-116 |
| SMU.152  | NC_004350.2:154456-154875 | protein_coding | -3.140729357 | 6.2198E-116 |
| NA       | NC_004350.2:155527-155835 | protein_coding | -3.431341938 | 4.9486E-156 |
| SMU.154  | NC_004350.2:156212-156481 | protein_coding | -3.046461081 | 1.0773E-137 |
| SMU.155  | NC_004350.2:157228-159420 | protein_coding | 0.629741842  | 3.19569E-08 |
| SMU.156  | NC_004350.2:159410-160150 | protein_coding | 0.014431038  | 0.938292359 |
| SMU.157  | NC_004350.2:160161-160778 | protein_coding | 0.211007435  | 0.160577877 |
| SMU.158  | NC_004350.2:160852-162195 | protein_coding | -0.229057022 | 0.105714708 |
| SMU.159  | NC_004350.2:162188-162607 | protein_coding | -0.354742211 | 0.050819815 |
| SMU.160  | NC_004350.2:162786-163691 | protein_coding | -0.399206919 | 0.005388837 |
| SMU.161  | NC_004350.2:163670-164407 | protein_coding | -0.377082995 | 0.024620174 |
| SMU.162c | NC_004350.2:164443-165435 | protein_coding | 1.358303608  | 2.52636E-18 |
| SMU.163c | NC_004350.2:165624-166178 | protein_coding | 0.995502064  | 2.22778E-09 |
| SMU.164  | NC_004350.2:166491-167237 | protein_coding | 0.586620493  | 0.002054837 |
| SMU.165  | NC_004350.2:167261-168121 | protein_coding | 0.995856691  | 3.29132E-07 |
| SMU.166  | NC_004350.2:168253-168768 | protein_coding | -1.096479489 | 7.6497E-10  |
| SMU.167  | NC_004350.2:168768-169214 | protein_coding | -1.126235363 | 7.61958E-08 |
| SMU.168  | NC_004350.2:169211-169405 | protein_coding | -1.150117519 | 5.08339E-08 |
| SMU.169  | NC_004350.2:169798-170244 | protein_coding | 1.008921451  | 5.24928E-16 |
| SMU.170  | NC_004350.2:170269-170661 | protein_coding | 1.28291396   | 1.39824E-32 |
| SMU.172  | NC_004350.2:170983-171228 | protein_coding | -0.190701075 | 0.388486301 |
| SMU.173  | NC_004350.2:171222-171554 | protein_coding | 0.349390264  | 0.133404926 |
| SMU.174c | NC_004350.2:171752-172543 | protein_coding | -0.831088367 | 8.58015E-06 |
| NA       | NC_004350.2:172710-173063 | pseudogene     | 2.56505891   | 3.20586E-08 |
| SMU.177  | NC_004350.2:173245-174465 | protein_coding | 1.444992434  | 3.51451E-20 |

|          |                           |                |              |             |
|----------|---------------------------|----------------|--------------|-------------|
| SMU.178  | NC_004350.2:174443-175291 | protein_coding | 0.963581314  | 6.03715E-08 |
| SMU.179  | NC_004350.2:175433-176035 | protein_coding | -1.586893662 | 5.18354E-56 |
| SMU.180  | NC_004350.2:176037-178448 | protein_coding | -1.706302606 | 6.81471E-95 |
| SMU.181  | NC_004350.2:178654-179652 | protein_coding | -0.312375567 | 0.047774545 |
| SMU.182  | NC_004350.2:179874-180596 | protein_coding | -2.027936932 | 2.56016E-31 |
| SMU.183  | NC_004350.2:180593-181432 | protein_coding | -1.968590473 | 5.93379E-74 |
| SMU.184  | NC_004350.2:181479-182399 | protein_coding | -2.289174897 | 2.0988E-148 |
| SMU.186  | NC_004350.2:182584-183237 | protein_coding | -2.582699611 | 7.69E-166   |
| SMU.187c | NC_004350.2:183417-184394 | protein_coding | 1.453271303  | 9.88667E-33 |
| SMU.188c | NC_004350.2:184381-185253 | protein_coding | 1.776443692  | 2.78432E-23 |
| SMU_r04  | NC_004350.2:185742-187298 | rRNA           | -1.318858669 | 0.6965518   |
| SMU_t21  | NC_004350.2:187358-187430 | tRNA           | NA           | NA          |
| SMU_r05  | NC_004350.2:187687-190587 | rRNA           | 1.995433231  | 0.395020455 |
| SMU_r06  | NC_004350.2:190770-190885 | rRNA           | 1.969893315  | 0.255078947 |
| SMU_t22  | NC_004350.2:190890-190962 | tRNA           | 0.49520461   | 0.891783044 |
| SMU_t23  | NC_004350.2:190968-191038 | tRNA           | 3.38699621   | 0.0160618   |
| SMU_t24  | NC_004350.2:191073-191146 | tRNA           | NA           | NA          |
| SMU_t25  | NC_004350.2:191158-191229 | tRNA           | 0            | 1           |
| SMU_t26  | NC_004350.2:191244-191333 | tRNA           | 2.44471347   | 0.46629333  |
| SMU_t27  | NC_004350.2:191346-191419 | tRNA           | NA           | NA          |
| SMU_t28  | NC_004350.2:191429-191501 | tRNA           | 0.120768938  | 0.922599346 |
| SMU_t29  | NC_004350.2:191517-191597 | tRNA           | 1.937849073  | 0.469737111 |
| SMU_t30  | NC_004350.2:191604-191674 | tRNA           | 1.99724313   | 0.191402156 |
| SMU_t31  | NC_004350.2:191688-191760 | tRNA           | 1.997054042  | 0.60175791  |
| SMU_t32  | NC_004350.2:191777-191848 | tRNA           | 2.759071897  | 0.372803191 |
| SMU_t33  | NC_004350.2:191863-191946 | tRNA           | 4.300713768  | 0.004633157 |
| SMU.191c | NC_004350.2:192029-193183 | protein_coding | -0.791922431 | 0.031754055 |
| SMU.193c | NC_004350.2:193199-193384 | protein_coding | -0.571962571 | 0.370291671 |
| SMU.194c | NC_004350.2:193388-193639 | protein_coding | -0.813777154 | 0.056590357 |
| SMU.195c | NC_004350.2:193675-193935 | protein_coding | -0.256563414 | 0.448447098 |
| SMU.196c | NC_004350.2:193953-195050 | protein_coding | -0.038221764 | 0.837270863 |
| SMU.197c | NC_004350.2:195072-197498 | protein_coding | -0.515259425 | 0.001190714 |
| SMU.198c | NC_004350.2:197498-200041 | protein_coding | -0.563253392 | 1.17703E-05 |
| SMU.199c | NC_004350.2:200061-200441 | protein_coding | -0.694443488 | 0.043424439 |
| SMU.200c | NC_004350.2:200470-200697 | protein_coding | 0.080968517  | 0.751730618 |
| SMU.201c | NC_004350.2:200710-201690 | protein_coding | -0.188292867 | 0.292728707 |
| SMU.202c | NC_004350.2:201706-202179 | protein_coding | 0.399113347  | 0.030688646 |
| SMU.205c | NC_004350.2:202493-202765 | protein_coding | 0.601869475  | 0.0389054   |
| SMU.206c | NC_004350.2:202868-203269 | protein_coding | 0.48491193   | 0.03715331  |
| SMU.207c | NC_004350.2:203232-204464 | protein_coding | -0.024735227 | 0.888920618 |
| SMU.208c | NC_004350.2:204699-206423 | protein_coding | 0.048107213  | 0.736544301 |
| SMU.209c | NC_004350.2:206439-206864 | protein_coding | 0.42080914   | 0.05760911  |
| SMU.210c | NC_004350.2:206888-207199 | protein_coding | 0.373748909  | 0.089255778 |
| SMU.211c | NC_004350.2:207419-207862 | protein_coding | 2.158987508  | 2.16118E-25 |
| SMU.213c | NC_004350.2:208136-208327 | protein_coding | 1.051963949  | 3.17151E-06 |
| SMU.214c | NC_004350.2:208355-208663 | protein_coding | 1.991654335  | 2.08356E-09 |
| SMU.215c | NC_004350.2:208672-208815 | protein_coding | 1.731854182  | 3.45411E-05 |
| SMU.216c | NC_004350.2:208952-209290 | protein_coding | 2.288752217  | 4.14496E-09 |
| SMU.217c | NC_004350.2:209386-209913 | protein_coding | 1.512581799  | 2.12997E-07 |
| SMU.218  | NC_004350.2:210660-211013 | protein_coding | -1.71206058  | 4.89192E-06 |
| SMU.219  | NC_004350.2:211020-211451 | protein_coding | -2.577124717 | 1.37657E-15 |
| NA       | NC_004350.2:211577-211675 | protein_coding | -2.46573093  | 2.03811E-36 |
| SMU.220c | NC_004350.2:211770-212222 | protein_coding | 0.865016714  | 1.07106E-06 |
| SMU.221c | NC_004350.2:212568-213197 | protein_coding | 0.176623331  | 0.243128681 |
| SMU.222c | NC_004350.2:213510-213704 | protein_coding | 0.259487696  | 0.364006351 |
| NA       | NC_004350.2:214544-215438 | pseudogene     | 0.387155725  | 0.00014944  |
| SMU.227c | NC_004350.2:215841-216404 | protein_coding | -0.058411629 | 0.718020653 |
| SMU.228  | NC_004350.2:216789-217154 | protein_coding | 0.727728616  | 0.000319134 |
| SMU.229  | NC_004350.2:217154-218821 | protein_coding | 0.358363821  | 0.000635529 |

|          |                           |                |              |             |
|----------|---------------------------|----------------|--------------|-------------|
| SMU.231  | NC_004350.2:218987-220690 | protein_coding | 0.82861192   | 5.39569E-10 |
| SMU.232  | NC_004350.2:220683-221165 | protein_coding | 0.606483819  | 0.000246951 |
| SMU.233  | NC_004350.2:221232-222254 | protein_coding | -0.109173269 | 0.428454359 |
| SMU.234  | NC_004350.2:222495-223745 | protein_coding | 1.888275809  | 3.68808E-42 |
| SMU.235  | NC_004350.2:223800-224687 | protein_coding | 0.625694239  | 7.71968E-08 |
| SMU.236c | NC_004350.2:224810-225451 | protein_coding | -2.035944797 | 6.53187E-51 |
| SMU.237c | NC_004350.2:225477-226700 | protein_coding | -2.266334392 | 3.01322E-63 |
| SMU.238c | NC_004350.2:226697-227416 | protein_coding | -2.607332163 | 4.61652E-45 |
| SMU.239c | NC_004350.2:227612-228202 | protein_coding | 0.773510258  | 0.098260257 |
| SMU.241c | NC_004350.2:228505-229245 | protein_coding | -0.69102392  | 1.94011E-05 |
| SMU.242c | NC_004350.2:229245-230798 | protein_coding | -0.651814399 | 1.82885E-05 |
| SMU.243  | NC_004350.2:230950-232851 | protein_coding | 0.45308446   | 0.000825651 |
| SMU.244  | NC_004350.2:232909-233754 | protein_coding | 0.274526805  | 0.163938955 |
| SMU.245  | NC_004350.2:233844-234566 | protein_coding | 0.560003187  | 0.000136038 |
| SMU.246  | NC_004350.2:234572-235732 | protein_coding | 0.751356704  | 1.45675E-10 |
| SMU.247  | NC_004350.2:235806-236576 | protein_coding | 0.787151049  | 6.34292E-08 |
| SMU.248  | NC_004350.2:236614-237876 | protein_coding | 0.2395582    | 0.028627668 |
| SMU.249  | NC_004350.2:237881-239110 | protein_coding | 0.214275387  | 0.039888497 |
| SMU.250  | NC_004350.2:239097-239531 | protein_coding | 0.298953884  | 0.107136793 |
| SMU.251  | NC_004350.2:239552-240967 | protein_coding | 0.047177841  | 0.674892486 |
| SMU.252  | NC_004350.2:241259-242032 | protein_coding | -0.924547719 | 8.02932E-06 |
| SMU.253  | NC_004350.2:242290-243531 | protein_coding | -0.425178847 | 0.010275068 |
| SMU.255  | NC_004350.2:243822-245471 | protein_coding | -0.740883123 | 1.05857E-09 |
| SMU.256  | NC_004350.2:245577-246491 | protein_coding | -0.23640413  | 0.127368608 |
| SMU.257  | NC_004350.2:246502-247533 | protein_coding | -0.154132994 | 0.172229603 |
| SMU.258  | NC_004350.2:247543-248595 | protein_coding | -0.490823679 | 1.31717E-06 |
| SMU.259  | NC_004350.2:248588-249514 | protein_coding | -0.866902789 | 7.16442E-20 |
| SMU.260  | NC_004350.2:250170-250772 | protein_coding | 3.489294591  | 7.63348E-58 |
| SMU.261c | NC_004350.2:250989-251945 | protein_coding | 0.722636409  | 0.027187942 |
| SMU.262  | NC_004350.2:252184-253203 | protein_coding | 4.213255166  | 5.41971E-22 |
| SMU.263  | NC_004350.2:253301-254659 | protein_coding | 4.641897739  | 1.30204E-25 |
| SMU.264  | NC_004350.2:254669-255778 | protein_coding | 4.430695246  | 3.63085E-15 |
| SMU.265  | NC_004350.2:255810-256760 | protein_coding | 4.809396574  | 8.28908E-13 |
| SMU.267c | NC_004350.2:257272-259575 | protein_coding | -0.315892904 | 0.021831674 |
| SMU.268  | NC_004350.2:259734-261023 | protein_coding | -0.651678242 | 7.35736E-09 |
| SMU.270  | NC_004350.2:261355-262812 | protein_coding | 2.190982286  | 0.008623087 |
| SMU.271  | NC_004350.2:262880-263161 | protein_coding | 1.137439421  | 0.024817523 |
| SMU.272  | NC_004350.2:263227-263712 | protein_coding | 1.860473303  | 0.000101028 |
| SMU.273  | NC_004350.2:263751-264416 | protein_coding | 1.420525737  | 0.006094872 |
| SMU.274  | NC_004350.2:264422-265285 | protein_coding | 1.716524279  | 0.003334421 |
| SMU.275  | NC_004350.2:265288-265998 | protein_coding | 1.787170862  | 0.001851397 |
| SMU.277  | NC_004350.2:266388-266663 | protein_coding | 1.184818028  | 0.006608111 |
| SMU.278  | NC_004350.2:266877-267038 | protein_coding | 2.054061804  | 4.89307E-06 |
| SMU.279  | NC_004350.2:267523-267732 | protein_coding | 2.224257343  | 0.010805075 |
| SMU.281  | NC_004350.2:267970-268248 | protein_coding | 1.837842039  | 0.00085704  |
| NA       | NC_004350.2:268857-269042 | protein_coding | 1.354783184  | 0.001912726 |
| SMU.283  | NC_004350.2:269323-269541 | protein_coding | 1.04415323   | 0.027692004 |
| SMU.284  | NC_004350.2:269566-269973 | protein_coding | 0.869908651  | 0.03382275  |
| SMU.286  | NC_004350.2:270628-272910 | protein_coding | 0.404883139  | 0.000277144 |
| SMU.287  | NC_004350.2:272924-273826 | protein_coding | 0.078964164  | 0.543976929 |
| SMU.289  | NC_004350.2:274183-275850 | protein_coding | -1.005534211 | 6.60629E-13 |
| SMU.290  | NC_004350.2:276429-277520 | protein_coding | 2.108891425  | 0.012591942 |
| SMU.291  | NC_004350.2:277894-279870 | protein_coding | 0.541104235  | 0.299793874 |
| SMU.292  | NC_004350.2:280430-281398 | protein_coding | 0.266548552  | 0.370551823 |
| SMU.293  | NC_004350.2:281529-282041 | protein_coding | 0.921980954  | 0.004805941 |
| SMU.294  | NC_004350.2:282116-282568 | protein_coding | 0.197725017  | 0.602754322 |
| SMU.295  | NC_004350.2:282568-282951 | protein_coding | 0.386785706  | 0.279138478 |
| SMU.296  | NC_004350.2:282969-283943 | protein_coding | 0.218767903  | 0.45181259  |
| SMU.297  | NC_004350.2:284102-286738 | protein_coding | 0.468223817  | 4.51948E-05 |

|          |                           |                |              |             |
|----------|---------------------------|----------------|--------------|-------------|
| SMU.298  | NC_004350.2:286831-287259 | protein_coding | -0.063637304 | 0.679818246 |
| SMU.299c | NC_004350.2:287452-287670 | protein_coding | 2.475305763  | 6.32464E-17 |
| SMU.300  | NC_004350.2:288082-289224 | protein_coding | 0.252489225  | 0.119368429 |
| SMU.301  | NC_004350.2:289224-289787 | protein_coding | -0.372867549 | 0.012085601 |
| SMU.302  | NC_004350.2:290214-291227 | protein_coding | 0.388558887  | 0.048965433 |
| SMU.303  | NC_004350.2:291304-292080 | protein_coding | -1.07993594  | 5.75056E-22 |
| SMU.304  | NC_004350.2:292080-292550 | protein_coding | -1.204306189 | 1.53137E-16 |
| SMU.305  | NC_004350.2:292547-293110 | protein_coding | -1.114779213 | 4.02279E-18 |
| NA       | NC_004350.2:293138-293235 | SRP_RNA        | 2.372709255  | 0.000501113 |
| SMU.307  | NC_004350.2:293667-295016 | protein_coding | -1.463828886 | 1.58046E-59 |
| SMU.308  | NC_004350.2:295182-295982 | protein_coding | -0.745625421 | 1.18281E-05 |
| SMU.309  | NC_004350.2:296004-297869 | protein_coding | -1.243416877 | 1.63486E-21 |
| SMU.310  | NC_004350.2:297869-298357 | protein_coding | -1.10321237  | 3.75932E-08 |
| SMU.311  | NC_004350.2:298437-298979 | protein_coding | -0.736173394 | 5.63504E-07 |
| SMU.312  | NC_004350.2:299070-300080 | protein_coding | -0.762129774 | 1.02707E-10 |
| SMU.313  | NC_004350.2:300122-300487 | protein_coding | -0.558207107 | 0.003166638 |
| SMU.314  | NC_004350.2:300696-300899 | protein_coding | -0.537448888 | 0.024587186 |
| SMU.317  | NC_004350.2:301122-301820 | protein_coding | -0.213060108 | 0.287759927 |
| SMU.318  | NC_004350.2:302577-303707 | protein_coding | -0.982727253 | 6.04663E-16 |
| SMU.320  | NC_004350.2:304041-304577 | protein_coding | 0.742421807  | 0.004214955 |
| SMU.321  | NC_004350.2:304564-305235 | protein_coding | 0.686253115  | 0.000377333 |
| SMU.322c | NC_004350.2:305257-306177 | protein_coding | 0.358708146  | 0.007391679 |
| SMU.323  | NC_004350.2:306179-307198 | protein_coding | 0.812585785  | 2.23853E-11 |
| SMU.325  | NC_004350.2:307522-307965 | protein_coding | -0.481409943 | 0.028233422 |
| SMU.326  | NC_004350.2:307975-308445 | protein_coding | -0.297058832 | 0.222089022 |
| SMU.327  | NC_004350.2:308403-309803 | protein_coding | -0.052592474 | 0.680263438 |
| SMU.328  | NC_004350.2:309893-310387 | protein_coding | 0.537877021  | 9.37661E-06 |
| SMU.329  | NC_004350.2:310576-311289 | protein_coding | -0.199718234 | 0.111262223 |
| SMU.330  | NC_004350.2:311576-313033 | protein_coding | -0.654349149 | 5.3309E-09  |
| SMU.331  | NC_004350.2:313149-313673 | protein_coding | -0.806350751 | 4.22603E-09 |
| SMU.332  | NC_004350.2:313740-314288 | protein_coding | -0.862589177 | 5.89199E-10 |
| SMU.333  | NC_004350.2:314437-315672 | protein_coding | -0.309133443 | 0.007083039 |
| SMU.334  | NC_004350.2:315869-317059 | protein_coding | -0.941273217 | 3.71118E-15 |
| SMU.335  | NC_004350.2:317402-318784 | protein_coding | 0.424080479  | 0.025637357 |
| SMU.336  | NC_004350.2:318879-319238 | protein_coding | 0.964076733  | 0.000918951 |
| SMU.337  | NC_004350.2:319222-320037 | protein_coding | 1.055494355  | 7.6324E-14  |
| SMU.338  | NC_004350.2:320050-321018 | protein_coding | 0.777758966  | 1.81403E-08 |
| SMU.339  | NC_004350.2:321128-321730 | protein_coding | 0.719342693  | 6.95295E-08 |
| SMU.340  | NC_004350.2:321953-322087 | protein_coding | 0.25196052   | 0.122021561 |
| SMU.341  | NC_004350.2:322388-323164 | protein_coding | 1.12548146   | 1.59636E-12 |
| SMU.342  | NC_004350.2:323395-323967 | protein_coding | 1.39664151   | 5.73966E-22 |
| SMU.343  | NC_004350.2:324244-324765 | protein_coding | 1.669617758  | 8.60361E-17 |
| SMU.344  | NC_004350.2:324812-325123 | protein_coding | 1.869621065  | 1.48694E-20 |
| SMU.345c | NC_004350.2:325128-325442 | protein_coding | -0.19035265  | 0.529587965 |
| SMU.346  | NC_004350.2:325543-326157 | protein_coding | 1.964110666  | 2.65492E-17 |
| SMU.348  | NC_004350.2:326257-326703 | protein_coding | 1.839224382  | 1.96244E-24 |
| SMU.349  | NC_004350.2:326715-327590 | protein_coding | 1.501113133  | 1.06141E-26 |
| SMU.350  | NC_004350.2:327600-328004 | protein_coding | 1.140121229  | 1.29862E-10 |
| SMU_t34  | NC_004350.2:328109-328197 | tRNA           | 1.937764073  | 0.066564529 |
| SMU_t35  | NC_004350.2:328360-328442 | tRNA           | 1.324741117  | 0.777959254 |
| SMU.351  | NC_004350.2:328549-329421 | protein_coding | 0.121455762  | 0.3700957   |
| SMU.352  | NC_004350.2:329429-330088 | protein_coding | -2.076097037 | 1.76831E-62 |
| SMU.353  | NC_004350.2:330081-330713 | protein_coding | -1.743942839 | 5.00585E-42 |
| SMU.354  | NC_004350.2:330720-331994 | protein_coding | -1.900127309 | 1.45826E-63 |
| SMU.355  | NC_004350.2:331984-332952 | protein_coding | -1.697073505 | 1.03308E-30 |
| SMU.356  | NC_004350.2:333020-333835 | protein_coding | -1.186375361 | 3.33373E-22 |
| SMU.357  | NC_004350.2:334095-334508 | protein_coding | 0.849333692  | 1.01412E-18 |
| SMU.358  | NC_004350.2:334526-334996 | protein_coding | 0.888618157  | 5.10697E-22 |
| SMU.359  | NC_004350.2:335165-337246 | protein_coding | 0.551394944  | 8.6214E-08  |



|          |                           |                |              |             |
|----------|---------------------------|----------------|--------------|-------------|
| SMU.360  | NC_004350.2:337541-338554 | protein_coding | -1.737062814 | 4.43258E-77 |
| SMU.361  | NC_004350.2:338960-340156 | protein_coding | -0.412480549 | 3.02605E-06 |
| SMU.362  | NC_004350.2:340543-341061 | protein_coding | 1.187735399  | 2.57381E-12 |
| SMU.363  | NC_004350.2:341143-341514 | protein_coding | -1.153761108 | 1.37395E-26 |
| SMU.364  | NC_004350.2:341554-342900 | protein_coding | -0.276408005 | 0.024432753 |
| SMU.365  | NC_004350.2:343060-347577 | protein_coding | -0.231640271 | 0.011044376 |
| SMU.366  | NC_004350.2:347579-349015 | protein_coding | -0.49239738  | 3.07171E-06 |
| SMU.367  | NC_004350.2:349163-349798 | protein_coding | -0.120932464 | 0.384851073 |
| SMU.368c | NC_004350.2:349984-351666 | protein_coding | -0.066931498 | 0.584680127 |
| SMU.369c | NC_004350.2:351668-351898 | protein_coding | 0.541955886  | 0.152762031 |
| SMU.370  | NC_004350.2:352360-353205 | protein_coding | -0.150194454 | 0.724244914 |
| SMU.371  | NC_004350.2:353198-353911 | protein_coding | -0.644024569 | 0.217603553 |
| SMU.372  | NC_004350.2:353956-355119 | protein_coding | -0.487409402 | 0.216017453 |
| SMU.373  | NC_004350.2:355112-355855 | protein_coding | 0.123006604  | 0.766145256 |
| SMU.374  | NC_004350.2:355842-356552 | protein_coding | -0.240565185 | 0.554364093 |
| SMU.375  | NC_004350.2:356563-357471 | protein_coding | -0.42846859  | 0.154136761 |
| SMU.376  | NC_004350.2:357487-358725 | protein_coding | -0.27244179  | 0.177552204 |
| SMU.378  | NC_004350.2:358920-359159 | protein_coding | -0.668414847 | 0.258444824 |
| SMU.381c | NC_004350.2:359781-360683 | protein_coding | -0.114555139 | 0.390101224 |
| SMU.382c | NC_004350.2:361058-362026 | protein_coding | 1.572620947  | 6.78245E-06 |
| SMU.383c | NC_004350.2:362047-363093 | protein_coding | 2.037949238  | 4.4224E-09  |
| SMU.384  | NC_004350.2:363267-363725 | protein_coding | -1.317094876 | 0.005749074 |
| SMU.385  | NC_004350.2:363736-364422 | protein_coding | -0.652933481 | 0.006457104 |
| SMU.386  | NC_004350.2:364422-364856 | protein_coding | -0.938356757 | 0.000211557 |
| SMU.387  | NC_004350.2:364871-365881 | protein_coding | -0.904804892 | 9.25302E-06 |
| SMU.388  | NC_004350.2:365960-366658 | protein_coding | -0.027063324 | 0.872394781 |
| SMU.389  | NC_004350.2:366648-366971 | protein_coding | -0.258486033 | 0.273574096 |
| SMU.391c | NC_004350.2:367067-367492 | protein_coding | -2.822609944 | 3.87939E-92 |
| SMU.392c | NC_004350.2:367656-368828 | protein_coding | 0.664532763  | 0.000671002 |
| SMU.393  | NC_004350.2:368963-369478 | protein_coding | -0.309203498 | 0.369951145 |
| SMU.394c | NC_004350.2:369598-369897 | protein_coding | -0.611126287 | 0.001783874 |
| SMU.395  | NC_004350.2:370156-372432 | protein_coding | -0.085607145 | 0.552793094 |
| SMU.396  | NC_004350.2:372547-373416 | protein_coding | 1.768526091  | 7.50385E-41 |
| SMU.399  | NC_004350.2:373588-374346 | protein_coding | -1.231269462 | 2.22455E-13 |
| SMU.400  | NC_004350.2:374343-375293 | protein_coding | -1.364807276 | 1.59214E-27 |
| SMU.401c | NC_004350.2:375427-375867 | protein_coding | 2.078276073  | 5.43288E-15 |
| SMU.402  | NC_004350.2:376029-378356 | protein_coding | -1.082645902 | 2.63602E-23 |
| SMU.403  | NC_004350.2:378579-379691 | protein_coding | 1.256747118  | 6.54255E-15 |
| SMU.404c | NC_004350.2:379697-380020 | protein_coding | -0.341192302 | 0.12810913  |
| SMU.405c | NC_004350.2:380033-380440 | protein_coding | -1.031733116 | 0.000766691 |
| SMU.406c | NC_004350.2:380555-381367 | protein_coding | 0.697008235  | 0.001485942 |
| SMU.407  | NC_004350.2:381676-382275 | protein_coding | 2.09037214   | 1.30266E-10 |
| SMU.408  | NC_004350.2:382345-383775 | protein_coding | 1.33326546   | 3.67284E-26 |
| SMU.409  | NC_004350.2:383904-384347 | protein_coding | 0.634406861  | 0.001967957 |
| SMU.410  | NC_004350.2:384678-385898 | protein_coding | 1.204604166  | 1.64926E-19 |
| SMU.411c | NC_004350.2:386068-386361 | protein_coding | -1.29551541  | 2.84754E-15 |
| SMU.412c | NC_004350.2:386358-386777 | protein_coding | -1.284107195 | 1.0753E-07  |
| SMU.413  | NC_004350.2:386842-387567 | protein_coding | 0.004745395  | 0.981686625 |
| SMU.414  | NC_004350.2:387570-388604 | protein_coding | 0.074305759  | 0.601265684 |
| SMU.415  | NC_004350.2:388663-389445 | protein_coding | -0.11364073  | 0.381629637 |
| SMU.416  | NC_004350.2:389455-390090 | protein_coding | -0.23811439  | 0.185076714 |
| SMU_t36  | NC_004350.2:390169-390255 | tRNA           | 1.548662671  | 0.390730866 |
| SMU.417  | NC_004350.2:390362-390853 | protein_coding | 3.083867319  | 4.35023E-80 |
| SMU.418  | NC_004350.2:390889-392082 | protein_coding | 2.740270049  | 2.4751E-126 |
| SMU.419  | NC_004350.2:392100-392396 | protein_coding | 2.368956449  | 4.22939E-27 |
| SMU.420  | NC_004350.2:392389-392691 | protein_coding | 2.226992494  | 1.19048E-39 |
| SMU.421  | NC_004350.2:392712-395462 | protein_coding | 1.721150489  | 5.77179E-79 |
| SMU.422  | NC_004350.2:395696-396046 | protein_coding | 1.48988263   | 3.6963E-26  |
| SMU.423  | NC_004350.2:396531-396761 | protein_coding | -2.436633452 | 1.39301E-59 |

|          |                           |                |              |             |
|----------|---------------------------|----------------|--------------|-------------|
| SMU.424  | NC_004350.2:397152-397595 | protein_coding | 1.524160511  | 1.02527E-19 |
| SMU.426  | NC_004350.2:397592-399820 | protein_coding | 2.167570678  | 4.10664E-62 |
| SMU.427  | NC_004350.2:399833-400036 | protein_coding | 2.00083434   | 9.56827E-36 |
| SMU.428  | NC_004350.2:400277-401104 | protein_coding | 1.102171397  | 1.37845E-11 |
| SMU.429c | NC_004350.2:401211-401702 | protein_coding | 1.162573965  | 0.00462378  |
| SMU.431  | NC_004350.2:402057-402923 | protein_coding | 1.330350062  | 1.25964E-08 |
| SMU.432  | NC_004350.2:402924-403781 | protein_coding | 0.838237383  | 0.000233298 |
| SMU.433  | NC_004350.2:403795-404253 | protein_coding | 0.451695961  | 0.029398735 |
| SMU.434  | NC_004350.2:404267-404665 | protein_coding | 0.451151109  | 0.080847635 |
| SMU.435  | NC_004350.2:404987-406165 | protein_coding | -0.171624309 | 0.195867198 |
| NA       | NC_004350.2:406250-407599 | protein_coding | 0.87469015   | 0.695551195 |
| SMU.438c | NC_004350.2:407739-412040 | protein_coding | -1.893949369 | 2.78005E-80 |
| SMU.439  | NC_004350.2:412321-412932 | protein_coding | 0.373205494  | 0.17728829  |
| SMU.440  | NC_004350.2:413049-413465 | protein_coding | 0.037733     | 0.830946301 |
| SMU.441  | NC_004350.2:413462-413920 | protein_coding | 0.123843938  | 0.443823419 |
| SMU.442  | NC_004350.2:413913-414323 | protein_coding | 0.134594673  | 0.299982159 |
| SMU.445  | NC_004350.2:414774-415691 | protein_coding | 1.09098811   | 1.39133E-13 |
| SMU.446  | NC_004350.2:415694-417733 | protein_coding | -0.212663475 | 0.036193902 |
| SMU.447  | NC_004350.2:417839-418093 | protein_coding | -0.221531115 | 0.152762031 |
| SMU.448  | NC_004350.2:418217-418597 | protein_coding | -1.184590838 | 3.23532E-21 |
| SMU.449  | NC_004350.2:419095-419895 | protein_coding | 0.460813082  | 0.005950819 |
| SMU.450  | NC_004350.2:419899-421149 | protein_coding | 0.066286077  | 0.631528412 |
| SMU.453  | NC_004350.2:421452-422402 | protein_coding | 0.890540414  | 1.53144E-08 |
| SMU.454  | NC_004350.2:422412-422735 | protein_coding | 0.788257648  | 0.001839735 |
| SMU.455  | NC_004350.2:422739-424988 | protein_coding | 0.369750557  | 0.000755624 |
| SMU.456  | NC_004350.2:424990-426009 | protein_coding | 0.084585329  | 0.598311681 |
| SMU.457  | NC_004350.2:426043-426270 | protein_coding | 0.220644949  | 0.73467152  |
| SMU.458  | NC_004350.2:426390-427733 | protein_coding | 0.88910224   | 4.07677E-11 |
| SMU.459  | NC_004350.2:427974-428795 | protein_coding | -0.304734896 | 0.055694397 |
| SMU.460  | NC_004350.2:428818-429621 | protein_coding | -0.8851677   | 1.08812E-08 |
| SMU.461  | NC_004350.2:429621-430364 | protein_coding | -1.14502122  | 1.42304E-09 |
| SMU.462  | NC_004350.2:430413-430637 | protein_coding | -0.035609511 | 0.957855277 |
| SMU.463  | NC_004350.2:430700-431614 | protein_coding | 1.824650401  | 2.43545E-35 |
| SMU.464  | NC_004350.2:432078-433538 | protein_coding | 0.596012242  | 1.97646E-07 |
| SMU.465  | NC_004350.2:433535-434359 | protein_coding | -0.079198083 | 0.543976929 |
| SMU.466  | NC_004350.2:434472-435806 | protein_coding | 0.702023995  | 2.33704E-09 |
| SMU.467  | NC_004350.2:435922-438153 | protein_coding | 0.903557397  | 2.22123E-21 |
| SMU.469  | NC_004350.2:438146-438739 | protein_coding | 1.712571364  | 3.17682E-38 |
| SMU.470  | NC_004350.2:438819-439340 | protein_coding | -0.480028981 | 0.110011144 |
| SMU.471  | NC_004350.2:439446-439784 | protein_coding | -0.202597907 | 0.151854345 |
| NA       | NC_004350.2:439802-440176 | RNase_P_RNA    | -3.341660459 | 1.9124E-101 |
| SMU.472  | NC_004350.2:440234-441388 | protein_coding | 0.963637037  | 9.58895E-15 |
| SMU.473  | NC_004350.2:441404-443044 | protein_coding | 0.180702498  | 0.103372567 |
| SMU.474  | NC_004350.2:443205-443687 | protein_coding | -0.200350236 | 0.315633178 |
| SMU.475  | NC_004350.2:443832-445439 | protein_coding | 1.788754969  | 5.08803E-58 |
| SMU.478  | NC_004350.2:445886-446518 | protein_coding | 0.580760672  | 2.47915E-06 |
| SMU.479  | NC_004350.2:446542-446859 | protein_coding | 0.76144333   | 0.000216987 |
| SMU.480  | NC_004350.2:446901-449285 | protein_coding | 0.739126465  | 4.84871E-13 |
| SMU.481  | NC_004350.2:449345-450280 | protein_coding | 0.408104992  | 0.003003632 |
| SMU.482  | NC_004350.2:450261-451583 | protein_coding | 0.192577015  | 0.171332825 |
| SMU.483  | NC_004350.2:451622-452365 | protein_coding | 0.365737954  | 0.004808695 |
| SMU.484  | NC_004350.2:452362-454212 | protein_coding | -0.081499354 | 0.438234701 |
| SMU.485  | NC_004350.2:454653-455348 | protein_coding | 0.353913266  | 0.27889517  |
| SMU.486  | NC_004350.2:455345-456349 | protein_coding | 0.48313626   | 0.023586193 |
| SMU.487  | NC_004350.2:456342-456983 | protein_coding | 0.005411205  | 0.982733009 |
| SMU.488  | NC_004350.2:457027-458442 | protein_coding | 0.469062272  | 0.001273232 |
| SMU.489  | NC_004350.2:458426-458812 | protein_coding | -0.330779958 | 0.200089787 |
| SMU.490  | NC_004350.2:458891-459667 | protein_coding | -1.281974047 | 8.57877E-14 |
| SMU.491  | NC_004350.2:459798-460544 | protein_coding | 1.734472673  | 2.7539E-13  |

|          |                           |                |              |             |
|----------|---------------------------|----------------|--------------|-------------|
| SMU.493  | NC_004350.2:460793-463249 | protein_coding | -0.054348291 | 0.736544301 |
| SMU.494  | NC_004350.2:463268-463936 | protein_coding | -0.178444189 | 0.251210729 |
| SMU.495  | NC_004350.2:463974-465065 | protein_coding | -0.556512199 | 3.70862E-05 |
| SMU.496  | NC_004350.2:465399-466325 | protein_coding | -1.949987142 | 4.20172E-38 |
| SMU.497c | NC_004350.2:466416-467045 | protein_coding | -1.352208658 | 3.91325E-05 |
| SMU.498  | NC_004350.2:467118-468419 | protein_coding | -3.635874074 | 1.6442E-116 |
| SMU.499  | NC_004350.2:468416-469081 | protein_coding | -3.589109386 | 1.7022E-112 |
| SMU.500  | NC_004350.2:469160-469708 | protein_coding | -3.334763862 | 2.7367E-114 |
| SMU.501  | NC_004350.2:469832-470926 | protein_coding | 0.35313007   | 0.068446462 |
| SMU.502  | NC_004350.2:470946-472646 | protein_coding | 0.252923759  | 0.047459576 |
| SMU.503c | NC_004350.2:472726-473361 | protein_coding | -3.146234821 | 1.2689E-100 |
| SMU.504  | NC_004350.2:473630-474487 | protein_coding | -0.891741839 | 0.000377762 |
| SMU.505  | NC_004350.2:474477-475286 | protein_coding | -3.232342433 | 2.7713E-103 |
| SMU.506  | NC_004350.2:475270-476208 | protein_coding | -3.367386429 | 4.2272E-117 |
| NA       | NC_004350.2:476294-476476 | protein_coding | -3.527818467 | 7.6397E-48  |
| SMU.507  | NC_004350.2:476732-477478 | protein_coding | -1.050187601 | 2.89707E-05 |
| SMU.508  | NC_004350.2:477490-478314 | protein_coding | -1.297359376 | 3.82934E-11 |
| SMU.509  | NC_004350.2:478383-479447 | protein_coding | -0.074612741 | 0.807257093 |
| SMU.510c | NC_004350.2:479522-480157 | protein_coding | -1.546296507 | 2.69934E-50 |
| SMU.512c | NC_004350.2:480288-480641 | pseudogene     | 0.326719229  | 0.575693939 |
| NA       | NC_004350.2:480892-481095 | protein_coding | -0.485339442 | 0.201686054 |
| SMU.513  | NC_004350.2:481136-481369 | protein_coding | -0.280373969 | 0.477042571 |
| SMU.514  | NC_004350.2:481590-482156 | protein_coding | -0.295692006 | 0.20972863  |
| SMU.515  | NC_004350.2:482277-484052 | protein_coding | -0.314107255 | 0.157755027 |
| SMU.516  | NC_004350.2:484636-485175 | protein_coding | 1.115586758  | 0.000229872 |
| SMU.517  | NC_004350.2:485165-485665 | protein_coding | 0.826048913  | 6.31921E-06 |
| SMU.518  | NC_004350.2:485643-486683 | protein_coding | 0.538461885  | 0.000791727 |
| SMU.520  | NC_004350.2:486756-488087 | protein_coding | -0.196605533 | 0.279235752 |
| SMU.521  | NC_004350.2:488084-488632 | protein_coding | 0.12612892   | 0.590671586 |
| SMU.522  | NC_004350.2:488629-489714 | protein_coding | 0.093488601  | 0.477092614 |
| SMU.523  | NC_004350.2:489714-490250 | protein_coding | 0.108030641  | 0.553302756 |
| SMU.524  | NC_004350.2:490389-492152 | protein_coding | 2.18831644   | 1.96069E-33 |
| SMU.525  | NC_004350.2:492142-493884 | protein_coding | 1.657340186  | 3.86616E-23 |
| SMU.526c | NC_004350.2:493951-494787 | protein_coding | -1.372575027 | 1.30204E-25 |
| SMU.527  | NC_004350.2:495084-496118 | protein_coding | 1.728534676  | 9.66954E-24 |
| SMU.528c | NC_004350.2:496257-496538 | protein_coding | -0.918280322 | 5.92728E-06 |
| SMU.530c | NC_004350.2:496725-497462 | protein_coding | -0.989867078 | 3.15584E-11 |
| SMU.531  | NC_004350.2:498149-498445 | protein_coding | 3.368663602  | 0.001645697 |
| SMU.532  | NC_004350.2:498454-499815 | protein_coding | 2.062567225  | 3.34534E-24 |
| SMU.533  | NC_004350.2:499812-500375 | protein_coding | 1.177583695  | 3.6181E-08  |
| SMU.534  | NC_004350.2:500396-501403 | protein_coding | 1.248524987  | 3.62438E-10 |
| SMU.535  | NC_004350.2:501396-502163 | protein_coding | 0.839776076  | 0.00066044  |
| SMU.536  | NC_004350.2:502150-502731 | protein_coding | 1.050999667  | 0.000419068 |
| SMU.537  | NC_004350.2:502728-503939 | protein_coding | 1.01380677   | 1.99427E-08 |
| SMU.538  | NC_004350.2:503943-504725 | protein_coding | 0.452557235  | 0.034848361 |
| SMU.539c | NC_004350.2:504962-505618 | protein_coding | -4.204981231 | 1.44294E-78 |
| SMU.540  | NC_004350.2:505719-506246 | protein_coding | -0.423582014 | 0.004607756 |
| SMU.541  | NC_004350.2:506453-506659 | protein_coding | 0.412579757  | 0.347628489 |
| SMU.542  | NC_004350.2:506652-507623 | protein_coding | -0.601845396 | 1.88531E-07 |
| SMU.543  | NC_004350.2:507633-508022 | protein_coding | -0.798784918 | 1.06417E-08 |
| SMU.546  | NC_004350.2:508256-510100 | protein_coding | 0.670375868  | 2.49488E-11 |
| SMU.547  | NC_004350.2:510129-510383 | protein_coding | 0.617130186  | 0.001793477 |
| SMU.548  | NC_004350.2:510572-511927 | protein_coding | -0.836689884 | 1.7952E-18  |
| SMU.549  | NC_004350.2:511930-513015 | protein_coding | -1.439587663 | 3.37543E-45 |
| SMU.550  | NC_004350.2:513015-514139 | protein_coding | -1.856633973 | 3.06614E-57 |
| SMU.551  | NC_004350.2:514291-515652 | protein_coding | -0.56465486  | 1.72394E-08 |
| SMU.552  | NC_004350.2:515676-516980 | protein_coding | -0.526541996 | 6.67179E-08 |
| SMU.553  | NC_004350.2:516983-517654 | protein_coding | -0.674331711 | 2.85504E-06 |
| SMU.554  | NC_004350.2:517668-518243 | protein_coding | -0.773016947 | 1.9727E-13  |

|          |                           |                |              |             |
|----------|---------------------------|----------------|--------------|-------------|
| SMU.555  | NC_004350.2:518243-518503 | protein_coding | -0.976306182 | 9.72096E-07 |
| SMU.556  | NC_004350.2:518507-519298 | protein_coding | -1.003680119 | 2.96147E-22 |
| SMU.557  | NC_004350.2:519309-520124 | protein_coding | -0.879606568 | 8.05978E-17 |
| SMU.558  | NC_004350.2:520634-523426 | protein_coding | -1.250755573 | 8.43506E-35 |
| SMU.560c | NC_004350.2:524199-524501 | protein_coding | -0.328485217 | 0.011560288 |
| SMU.561c | NC_004350.2:524568-525023 | protein_coding | 2.646210977  | 1.82872E-79 |
| SMU.562  | NC_004350.2:525134-527395 | protein_coding | 2.584027187  | 4.0551E-186 |
| SMU.563  | NC_004350.2:527652-528632 | protein_coding | 0.499253998  | 0.064854801 |
| SMU.564  | NC_004350.2:528709-528939 | protein_coding | -0.373427992 | 0.139196329 |
| NA       | NC_004350.2:529007-530355 | protein_coding | 1.950456055  | 0.615382071 |
| SMU.567  | NC_004350.2:530592-531278 | protein_coding | 0.516584827  | 0.000456418 |
| SMU.568  | NC_004350.2:531278-532012 | protein_coding | 0.610399816  | 8.27793E-05 |
| SMU.569  | NC_004350.2:532205-532681 | protein_coding | -0.513279456 | 0.009421754 |
| SMU.570  | NC_004350.2:532678-534828 | protein_coding | -0.49808422  | 5.97734E-07 |
| SMU.571  | NC_004350.2:534847-534993 | protein_coding | -1.006991945 | 0.076556179 |
| SMU.572  | NC_004350.2:535113-535967 | protein_coding | 0.764361258  | 5.17726E-05 |
| SMU.573  | NC_004350.2:535964-536797 | protein_coding | 1.598509135  | 2.10037E-16 |
| SMU.574c | NC_004350.2:537123-537854 | protein_coding | -2.687560574 | 2.77789E-69 |
| SMU.575c | NC_004350.2:537856-538323 | protein_coding | -2.92990418  | 9.3994E-120 |
| SMU.576  | NC_004350.2:538499-539233 | protein_coding | -1.083857722 | 1.43703E-08 |
| SMU.577  | NC_004350.2:539214-540956 | protein_coding | -1.143301223 | 2.35594E-19 |
| SMU.580  | NC_004350.2:541399-542742 | protein_coding | 0.315112079  | 0.019978837 |
| SMU.581  | NC_004350.2:542717-542938 | protein_coding | 0.396578044  | 0.18049205  |
| SMU.582  | NC_004350.2:542935-543804 | protein_coding | 0.318902562  | 0.030024578 |
| SMU.583  | NC_004350.2:543797-544624 | protein_coding | 0.146347158  | 0.346483774 |
| SMU.584  | NC_004350.2:544611-545075 | protein_coding | -0.29510267  | 0.111262223 |
| SMU.585  | NC_004350.2:545092-546750 | protein_coding | -0.488059699 | 0.000620178 |
| SMU.586  | NC_004350.2:546972-547811 | protein_coding | -0.39056354  | 0.002865169 |
| SMU.587  | NC_004350.2:547804-548661 | protein_coding | -0.76094304  | 4.02343E-13 |
| SMU.588  | NC_004350.2:548636-549235 | protein_coding | -0.86812786  | 3.28424E-12 |
| SMU.589  | NC_004350.2:549332-549607 | protein_coding | -0.359553753 | 0.005409851 |
| SMU.590c | NC_004350.2:549699-549860 | protein_coding | 0.20394075   | 0.722522017 |
| SMU.591c | NC_004350.2:550027-551145 | protein_coding | 0.138611516  | 0.590304435 |
| SMU.592c | NC_004350.2:551152-551793 | protein_coding | 0.677375027  | 0.034817646 |
| SMU.593  | NC_004350.2:552056-552532 | protein_coding | 0.857665203  | 4.65185E-06 |
| SMU.595  | NC_004350.2:552813-553748 | protein_coding | 1.125052944  | 3.74277E-07 |
| SMU.596  | NC_004350.2:553966-554658 | protein_coding | -0.52407811  | 1.81917E-06 |
| SMU.597  | NC_004350.2:554905-556983 | protein_coding | -0.906595224 | 1.92602E-21 |
| SMU.598  | NC_004350.2:556993-557592 | protein_coding | -1.327277164 | 2.45343E-27 |
| SMU.599  | NC_004350.2:557804-558853 | protein_coding | 0.205021868  | 0.184404131 |
| SMU.600c | NC_004350.2:559025-559585 | protein_coding | 1.146493041  | 1.09533E-07 |
| SMU.602  | NC_004350.2:559938-560888 | protein_coding | 1.202483717  | 2.92678E-09 |
| SMU.603  | NC_004350.2:560966-562324 | protein_coding | 0.358423799  | 0.011073809 |
| SMU.605  | NC_004350.2:562431-563263 | pseudogene     | 0.491566576  | 0.02686923  |
| SMU.606  | NC_004350.2:563276-564523 | protein_coding | 0.12653182   | 0.442864879 |
| SMU.607  | NC_004350.2:564579-565262 | protein_coding | 0.178944556  | 0.359717299 |
| SMU.608  | NC_004350.2:565446-566990 | protein_coding | 0.636261818  | 1.45043E-05 |
| SMU.609  | NC_004350.2:567244-569079 | protein_coding | -3.137502714 | 7.2667E-279 |
| SMU.610  | NC_004350.2:569317-574005 | protein_coding | 2.051855465  | 3.6425E-123 |
| SMU.611  | NC_004350.2:574295-575848 | protein_coding | 2.245242893  | 1.9286E-82  |
| SMU.613  | NC_004350.2:576338-576616 | protein_coding | 1.799272601  | 4.24346E-13 |
| NA       | NC_004350.2:576802-577071 | protein_coding | 1.87143729   | 5.38775E-10 |
| SMU.616  | NC_004350.2:577901-578149 | protein_coding | 0.520360827  | 0.043113752 |
| SMU.618  | NC_004350.2:578193-578552 | protein_coding | -0.978521144 | 3.51266E-18 |
| SMU.621c | NC_004350.2:579567-580586 | protein_coding | -0.764180689 | 9.99369E-10 |
| SMU.622c | NC_004350.2:580632-581144 | protein_coding | -1.259156931 | 2.55587E-05 |
| SMU.623c | NC_004350.2:581233-582168 | protein_coding | -1.329891272 | 4.11191E-11 |
| SMU.624  | NC_004350.2:582307-583059 | protein_coding | 0.141270682  | 0.42995767  |
| SMU.625  | NC_004350.2:583200-583877 | protein_coding | -5.085014382 | 1.8777E-140 |

|          |                           |                |              |             |
|----------|---------------------------|----------------|--------------|-------------|
| SMU.626  | NC_004350.2:583867-586101 | protein_coding | -4.50468945  | 2.1047E-261 |
| SMU.627  | NC_004350.2:586287-586913 | protein_coding | -1.854793919 | 1.05937E-12 |
| SMU.628  | NC_004350.2:587081-588121 | protein_coding | -0.452221978 | 0.072029265 |
| SMU.629  | NC_004350.2:588268-588879 | protein_coding | 2.102462101  | 2.30115E-75 |
| SMU.630  | NC_004350.2:589431-590486 | protein_coding | 1.510694261  | 7.14576E-21 |
| SMU.631  | NC_004350.2:590651-591409 | protein_coding | -1.078002024 | 7.0608E-09  |
| SMU.632  | NC_004350.2:591478-591942 | protein_coding | -0.690961876 | 0.015681336 |
| SMU.633  | NC_004350.2:591989-593218 | protein_coding | -1.743117677 | 2.36744E-57 |
| SMU.634  | NC_004350.2:593404-594432 | protein_coding | 0.904846959  | 2.86329E-10 |
| SMU.635  | NC_004350.2:594570-595289 | protein_coding | 0.838556591  | 2.58096E-12 |
| SMU.636  | NC_004350.2:595419-596120 | protein_coding | 0.846309581  | 1.89189E-12 |
| SMU.638  | NC_004350.2:597135-597851 | protein_coding | 2.217037992  | 5.65347E-38 |
| SMU.639  | NC_004350.2:597866-598366 | protein_coding | 1.875204725  | 5.58129E-27 |
| SMU.640c | NC_004350.2:598456-599829 | protein_coding | 0.119973305  | 0.7271517   |
| SMU.641  | NC_004350.2:599957-600925 | protein_coding | 1.675448296  | 1.38384E-27 |
| NA       | NC_004350.2:600958-601085 | pseudogene     | 4.109742479  | 0.009443181 |
| SMU.642  | NC_004350.2:601170-601451 | protein_coding | 1.579049681  | 3.89007E-10 |
| SMU.643  | NC_004350.2:601557-602450 | protein_coding | 1.107038068  | 1.33509E-10 |
| SMU.644  | NC_004350.2:602758-603696 | protein_coding | -0.816551773 | 9.5083E-06  |
| SMU.645  | NC_004350.2:603718-605517 | protein_coding | -1.307534016 | 2.62224E-27 |
| SMU.646  | NC_004350.2:605730-606347 | protein_coding | -1.049261177 | 9.77143E-09 |
| SMU.647  | NC_004350.2:606397-607104 | protein_coding | -0.01774886  | 0.930597624 |
| SMU.648  | NC_004350.2:607166-608167 | protein_coding | 0.461358364  | 0.000559115 |
| SMU.649  | NC_004350.2:608406-608906 | protein_coding | 1.074604497  | 1.40413E-08 |
| SMU.650  | NC_004350.2:609121-611739 | protein_coding | 0.438572165  | 1.7196E-05  |
| SMU.651c | NC_004350.2:611951-612979 | protein_coding | 0.124225755  | 0.681764886 |
| SMU.652c | NC_004350.2:612999-613748 | protein_coding | 0.617098072  | 0.099612382 |
| SMU.653c | NC_004350.2:613742-614728 | protein_coding | 0.898186327  | 0.003870428 |
| SMU.654  | NC_004350.2:614938-615639 | protein_coding | 1.465685681  | 0.078174349 |
| SMU.656  | NC_004350.2:615641-616389 | pseudogene     | 1.844445135  | 0.036832191 |
| SMU.657  | NC_004350.2:616389-617135 | protein_coding | 2.105339646  | 0.000328253 |
| SMU.658  | NC_004350.2:617511-618350 | protein_coding | 2.951037409  | 2.98869E-05 |
| SMU.659  | NC_004350.2:618390-619049 | protein_coding | 1.008051295  | 0.049945816 |
| SMU.660  | NC_004350.2:619040-620422 | protein_coding | 0.778376891  | 0.011951329 |
| SMU.661  | NC_004350.2:620728-620973 | protein_coding | -1.440067433 | 4.55266E-06 |
| SMU.662  | NC_004350.2:621118-621807 | protein_coding | -0.732150661 | 3.0235E-05  |
| SMU.663  | NC_004350.2:621942-622964 | protein_coding | -0.408775413 | 0.415438118 |
| SMU.664  | NC_004350.2:623123-624316 | protein_coding | 0.177839065  | 0.667079609 |
| SMU.665  | NC_004350.2:624345-625082 | protein_coding | -0.279924463 | 0.567423314 |
| SMU.666  | NC_004350.2:625218-626357 | protein_coding | -0.753470622 | 0.010737394 |
| SMU.667  | NC_004350.2:626481-627440 | protein_coding | 2.646846919  | 2.7405E-123 |
| SMU.668c | NC_004350.2:628003-630162 | protein_coding | 3.06345851   | 5.3433E-179 |
| SMU.669c | NC_004350.2:630362-630586 | protein_coding | 1.967817698  | 6.14288E-34 |
| SMU.670  | NC_004350.2:630841-633507 | protein_coding | 0.938358257  | 6.24926E-26 |
| SMU.671  | NC_004350.2:633512-634630 | protein_coding | 0.497771893  | 8.31092E-08 |
| SMU.672  | NC_004350.2:634632-635813 | protein_coding | 0.073802236  | 0.495359424 |
| SMU.673  | NC_004350.2:636481-637278 | protein_coding | 0.008754033  | 0.957945292 |
| SMU.674  | NC_004350.2:637444-637707 | protein_coding | -1.675380657 | 1.06091E-52 |
| SMU.675  | NC_004350.2:637712-639445 | protein_coding | -1.400198487 | 1.75338E-44 |
| SMU.676  | NC_004350.2:639675-641102 | protein_coding | 0.746940174  | 8.88118E-16 |
| SMU.677  | NC_004350.2:641773-642165 | protein_coding | 0.512953028  | 0.193461545 |
| SMU.678  | NC_004350.2:642165-643007 | protein_coding | -0.184706114 | 0.55578952  |
| SMU.679  | NC_004350.2:643017-643883 | protein_coding | -0.320822378 | 0.218915086 |
| SMU.680  | NC_004350.2:643925-644263 | protein_coding | -0.035008497 | 0.945260635 |
| SMU.681  | NC_004350.2:644674-644859 | protein_coding | 0.66320619   | 0.076081306 |
| SMU.682  | NC_004350.2:645162-647720 | protein_coding | -0.962067336 | 2.55498E-06 |
| SMU.683  | NC_004350.2:647736-651149 | protein_coding | -1.152611294 | 7.83597E-19 |
| SMU.684  | NC_004350.2:651153-651842 | protein_coding | -0.71907327  | 0.000598165 |
| SMU.685  | NC_004350.2:651839-652240 | protein_coding | -1.064824243 | 6.71213E-08 |

|          |                           |                |              |             |
|----------|---------------------------|----------------|--------------|-------------|
| SMU.688  | NC_004350.2:652915-653412 | protein_coding | -1.329203533 | 1.30195E-08 |
| SMU.689  | NC_004350.2:653658-656597 | protein_coding | 0.254221594  | 0.0402428   |
| SMU.690  | NC_004350.2:656618-657205 | protein_coding | 0.447069869  | 0.004719275 |
| SMU.691  | NC_004350.2:657298-658518 | protein_coding | -0.898796964 | 6.34751E-11 |
| SMU.692  | NC_004350.2:658574-659059 | protein_coding | -0.839351597 | 3.13341E-12 |
| SMU.694c | NC_004350.2:659051-659245 | protein_coding | 0.913517635  | 0.425936261 |
| SMU.695  | NC_004350.2:659291-659773 | protein_coding | -0.566154163 | 1.35031E-05 |
| SMU.696  | NC_004350.2:659784-660467 | protein_coding | -0.370822865 | 0.001148385 |
| SMU.697  | NC_004350.2:660634-661164 | protein_coding | 0.238189566  | 0.06644535  |
| SMU.698  | NC_004350.2:661199-661399 | protein_coding | 0.776062487  | 3.70852E-08 |
| SMU.699  | NC_004350.2:661444-661803 | protein_coding | 0.55397837   | 7.90721E-05 |
| SMU.700c | NC_004350.2:662010-662636 | protein_coding | 0.633490092  | 3.18843E-06 |
| SMU.701c | NC_004350.2:662644-663012 | protein_coding | 1.329679905  | 6.63953E-06 |
| SMU.702c | NC_004350.2:663017-663490 | protein_coding | 1.358809042  | 3.78603E-18 |
| SMU.703c | NC_004350.2:663487-664329 | protein_coding | 2.032758071  | 1.59762E-43 |
| SMU.704c | NC_004350.2:664373-665356 | protein_coding | 2.188640759  | 7.65731E-37 |
| SMU.706c | NC_004350.2:665446-666015 | protein_coding | 4.042080335  | 3.91479E-35 |
| SMU.707c | NC_004350.2:666217-667065 | protein_coding | 1.14714044   | 1.39754E-15 |
| SMU.709  | NC_004350.2:667339-667863 | protein_coding | 0.257266868  | 0.309448342 |
| SMU.711  | NC_004350.2:667847-668236 | protein_coding | 1.526062502  | 0.000100577 |
| SMU.712  | NC_004350.2:668354-671077 | protein_coding | -1.628919561 | 8.94623E-72 |
| SMU.713  | NC_004350.2:671372-672649 | protein_coding | -0.268132044 | 0.042274383 |
| SMU.714  | NC_004350.2:672868-674064 | protein_coding | -0.340425521 | 0.000198482 |
| SMU.715  | NC_004350.2:674360-675118 | protein_coding | -1.354120774 | 1.54445E-33 |
| SMU.716  | NC_004350.2:675328-676560 | protein_coding | -1.323983197 | 7.43298E-30 |
| SMU.717  | NC_004350.2:676563-677777 | protein_coding | -1.270223914 | 1.57317E-31 |
| SMU.718c | NC_004350.2:677777-678586 | protein_coding | -1.308685995 | 4.94368E-17 |
| SMU.719c | NC_004350.2:678834-680138 | protein_coding | -1.405038376 | 1.00351E-27 |
| SMU.720  | NC_004350.2:680250-681128 | protein_coding | 0.23611375   | 0.298757873 |
| SMU.721  | NC_004350.2:681190-681582 | protein_coding | -0.148497881 | 0.545464806 |
| SMU.723  | NC_004350.2:681984-684665 | protein_coding | 0.842117487  | 3.19077E-13 |
| SMU.724  | NC_004350.2:684778-685518 | protein_coding | 1.120321753  | 1.57584E-05 |
| SMU.725c | NC_004350.2:685823-686680 | protein_coding | 0.660033612  | 0.009324032 |
| SMU.727  | NC_004350.2:686922-687305 | protein_coding | 0.713862371  | 0.065552195 |
| SMU.728  | NC_004350.2:687292-688176 | protein_coding | -0.546242779 | 0.004282852 |
| SMU.730  | NC_004350.2:688445-688657 | protein_coding | 0.45708324   | 0.69443922  |
| SMU.731  | NC_004350.2:688659-689393 | protein_coding | 0.338160579  | 0.328042666 |
| SMU.732  | NC_004350.2:689393-690043 | protein_coding | 0.099511288  | 0.775784737 |
| NA       | NC_004350.2:690063-690260 | protein_coding | 0.540750204  | 0.452372577 |
| SMU.734  | NC_004350.2:690257-690682 | protein_coding | 0.452472282  | 0.576170448 |
| SMU.735  | NC_004350.2:690868-691317 | protein_coding | -0.487690379 | 0.211567954 |
| SMU.737  | NC_004350.2:691383-692591 | protein_coding | 1.001848328  | 5.77705E-05 |
| NA       | NC_004350.2:692739-693046 | pseudogene     | 0.403995842  | 0.421362721 |
| SMU.739c | NC_004350.2:693190-694746 | protein_coding | 0.48516973   | 0.069156491 |
| SMU.741  | NC_004350.2:695056-696114 | protein_coding | -0.278228256 | 0.143480422 |
| SMU.742  | NC_004350.2:696178-697008 | protein_coding | -0.59544     | 0.000133533 |
| SMU.743  | NC_004350.2:697005-697826 | protein_coding | -0.691721994 | 1.09097E-07 |
| SMU.744  | NC_004350.2:697828-699324 | protein_coding | -0.546368786 | 2.48472E-07 |
| SMU.745  | NC_004350.2:699401-700765 | protein_coding | 0.728607058  | 9.80342E-08 |
| SMU.746c | NC_004350.2:700875-701690 | protein_coding | -0.099263786 | 0.410180174 |
| SMU.747c | NC_004350.2:701687-702592 | protein_coding | 0.323750533  | 0.001421742 |
| SMU.751  | NC_004350.2:703952-706078 | protein_coding | 0.47053087   | 0.000107418 |
| SMU.752  | NC_004350.2:706065-706502 | protein_coding | 0.287616186  | 0.213800078 |
| SMU.753  | NC_004350.2:706590-706889 | protein_coding | 1.21805636   | 6.97247E-12 |
| SMU.754  | NC_004350.2:707087-708022 | protein_coding | 0.058339278  | 0.629944585 |
| SMU.755  | NC_004350.2:708015-708794 | protein_coding | 1.142645927  | 1.24527E-21 |
| SMU.756  | NC_004350.2:708823-709218 | protein_coding | 1.318018813  | 1.91329E-15 |
| SMU.757  | NC_004350.2:709218-709673 | protein_coding | 0.857590102  | 1.15889E-09 |
| SMU.758c | NC_004350.2:709771-710058 | protein_coding | -1.606681883 | 8.53408E-05 |

|          |                           |                |              |             |
|----------|---------------------------|----------------|--------------|-------------|
| SMU.759  | NC_004350.2:710298-711224 | protein_coding | -0.415394548 | 0.000392253 |
| SMU.761  | NC_004350.2:711496-712782 | protein_coding | 0.454934426  | 0.000329935 |
| SMU.764  | NC_004350.2:712912-713472 | protein_coding | -0.616200605 | 2.21722E-06 |
| SMU.765  | NC_004350.2:713482-715014 | protein_coding | -0.399691389 | 4.48581E-05 |
| NA       | NC_004350.2:715085-716433 | protein_coding | 0.715820793  | 0.70847189  |
| SMU.768c | NC_004350.2:716480-716797 | protein_coding | -1.796517028 | 1.26094E-19 |
| SMU.769  | NC_004350.2:716931-717143 | protein_coding | -3.953637678 | 9.366E-174  |
| SMU.770c | NC_004350.2:717333-718673 | protein_coding | -0.759298865 | 1.94993E-09 |
| SMU.772  | NC_004350.2:719789-721969 | protein_coding | -3.309707081 | 5.6185E-178 |
| SMU.773c | NC_004350.2:722354-723844 | protein_coding | -0.157323054 | 0.164720052 |
| SMU.774  | NC_004350.2:724249-725151 | protein_coding | -1.042417439 | 4.95862E-14 |
| SMU.775c | NC_004350.2:725457-727610 | protein_coding | -0.356058712 | 0.001818784 |
| SMU.776  | NC_004350.2:727743-728900 | protein_coding | 0.069663998  | 0.668961154 |
| SMU.777  | NC_004350.2:728907-729584 | protein_coding | -0.0647926   | 0.660342648 |
| SMU.778  | NC_004350.2:729574-730443 | protein_coding | -0.385941511 | 0.001116463 |
| SMU.779  | NC_004350.2:730457-731524 | protein_coding | -0.603740334 | 4.69019E-08 |
| SMU.780  | NC_004350.2:731526-732692 | protein_coding | -0.752327796 | 1.59561E-11 |
| SMU.781  | NC_004350.2:732756-733862 | protein_coding | -0.448508982 | 1.14326E-06 |
| SMU.782  | NC_004350.2:733873-734214 | protein_coding | 0.184651336  | 0.27889517  |
| SMU.784  | NC_004350.2:734377-735660 | protein_coding | -0.591864567 | 0.000145001 |
| SMU.785  | NC_004350.2:735653-736129 | protein_coding | -0.618590865 | 0.004211749 |
| SMU.786  | NC_004350.2:736126-736950 | protein_coding | -0.627300842 | 4.51948E-05 |
| SMU.787  | NC_004350.2:736995-738383 | protein_coding | -0.666638222 | 5.44034E-09 |
| SMU.788  | NC_004350.2:738555-739910 | protein_coding | 0.876740167  | 3.48747E-06 |
| SMU.789  | NC_004350.2:740430-741065 | protein_coding | -0.435076346 | 0.000827261 |
| SMU.790  | NC_004350.2:741646-741885 | protein_coding | 1.587051258  | 0.068381494 |
| SMU.793  | NC_004350.2:742327-742716 | protein_coding | -1.119291602 | 4.39897E-06 |
| SMU.794  | NC_004350.2:742803-743180 | protein_coding | -1.481035677 | 4.04605E-17 |
| SMU.795  | NC_004350.2:743214-743621 | protein_coding | -1.414043256 | 1.44076E-15 |
| SMU.796  | NC_004350.2:743711-744544 | protein_coding | -1.554575502 | 1.27215E-29 |
| SMU.797  | NC_004350.2:744579-744797 | protein_coding | -1.916451053 | 3.64655E-15 |
| SMU.799c | NC_004350.2:745261-745623 | protein_coding | -0.753794895 | 0.00429236  |
| NA       | NC_004350.2:745948-746076 | protein_coding | -1.685458148 | 1.22776E-09 |
| SMU.801  | NC_004350.2:746130-747440 | protein_coding | -0.230073923 | 0.059685623 |
| SMU.802  | NC_004350.2:747742-747924 | protein_coding | -0.298727941 | 0.193976579 |
| SMU.803c | NC_004350.2:747961-749466 | protein_coding | 1.001168445  | 9.87016E-06 |
| SMU.804  | NC_004350.2:749833-751005 | protein_coding | -2.049923738 | 9.18149E-42 |
| SMU.805c | NC_004350.2:751261-752001 | protein_coding | -0.274935941 | 0.01036737  |
| SMU.806c | NC_004350.2:752001-754187 | protein_coding | 0.0149437    | 0.912055891 |
| SMU.807  | NC_004350.2:754378-755295 | protein_coding | 1.669319444  | 1.65028E-17 |
| SMU.809  | NC_004350.2:755492-757483 | protein_coding | -1.000589339 | 2.22282E-19 |
| SMU.811  | NC_004350.2:757815-758147 | protein_coding | -1.136961287 | 3.15979E-13 |
| SMU.813  | NC_004350.2:758451-759341 | protein_coding | -1.379104793 | 5.13894E-25 |
| SMU.814  | NC_004350.2:759399-759863 | protein_coding | -1.006302836 | 3.29479E-09 |
| SMU.815  | NC_004350.2:759971-760786 | protein_coding | -0.639656332 | 9.25792E-09 |
| SMU.816  | NC_004350.2:761002-762138 | protein_coding | 0.315082741  | 0.054040968 |
| SMU.817  | NC_004350.2:762171-762986 | protein_coding | -0.038127295 | 0.815155081 |
| SMU.818  | NC_004350.2:763198-763398 | protein_coding | 0.069315041  | 0.84526967  |
| SMU.819  | NC_004350.2:763556-763939 | protein_coding | 0.682052777  | 6.60729E-05 |
| SMU.820  | NC_004350.2:764099-765619 | protein_coding | -0.125829928 | 0.255503586 |
| SMU.821  | NC_004350.2:765793-767550 | protein_coding | 0.352685706  | 0.000487107 |
| SMU.822  | NC_004350.2:767558-768673 | protein_coding | 0.533582055  | 9.87991E-06 |
| SMU.823  | NC_004350.2:768686-769021 | protein_coding | 0.560810447  | 8.62704E-06 |
| SMU.824  | NC_004350.2:769338-770192 | protein_coding | 0.237887184  | 0.071948828 |
| SMU.825  | NC_004350.2:770299-771453 | protein_coding | 0.852085472  | 3.76478E-13 |
| SMU.826  | NC_004350.2:771443-772378 | protein_coding | 0.516835604  | 3.46335E-06 |
| SMU.827  | NC_004350.2:772378-773187 | protein_coding | 0.736896043  | 1.30195E-08 |
| SMU.828  | NC_004350.2:773187-774404 | protein_coding | 0.657127607  | 1.02505E-09 |
| SMU.829  | NC_004350.2:774427-775824 | protein_coding | 0.388438708  | 0.000359585 |

|          |                           |                |              |             |
|----------|---------------------------|----------------|--------------|-------------|
| SMU.830  | NC_004350.2:775821-777572 | protein_coding | 0.249193856  | 0.030977976 |
| SMU.831  | NC_004350.2:777569-780109 | protein_coding | -0.28647052  | 0.00361296  |
| SMU.832  | NC_004350.2:780146-781462 | protein_coding | -0.48226076  | 0.000276823 |
| SMU.833  | NC_004350.2:781479-782405 | protein_coding | -0.180322791 | 0.255078947 |
| SMU.834  | NC_004350.2:782537-783475 | protein_coding | -0.253740779 | 0.023500114 |
| SMU.835  | NC_004350.2:783609-785420 | protein_coding | -0.47713304  | 1.69675E-06 |
| SMU.836  | NC_004350.2:785626-787260 | protein_coding | -4.939346773 | 0           |
| SMU.837  | NC_004350.2:787379-788221 | protein_coding | -4.067397272 | 4.0854E-246 |
| SMU.838  | NC_004350.2:788354-789706 | protein_coding | -0.930095469 | 2.89551E-12 |
| SMU.839  | NC_004350.2:789726-790982 | protein_coding | 0.230821914  | 0.338755033 |
| SMU.840c | NC_004350.2:791322-791768 | protein_coding | -3.024028111 | 2.52382E-89 |
| SMU.841  | NC_004350.2:791892-793034 | protein_coding | 1.127042414  | 2.02325E-11 |
| SMU.842  | NC_004350.2:793149-794366 | protein_coding | 1.124601612  | 9.554E-19   |
| SMU.843  | NC_004350.2:794504-795685 | protein_coding | -0.980666589 | 4.01229E-16 |
| SMU.844  | NC_004350.2:795716-796246 | protein_coding | -0.768030388 | 1.72818E-07 |
| SMU.845  | NC_004350.2:796274-796861 | protein_coding | -0.943288622 | 2.06869E-10 |
| SMU.846  | NC_004350.2:797035-797349 | protein_coding | -0.262618576 | 0.048962001 |
| SMU.848  | NC_004350.2:797361-797696 | protein_coding | 0.012995981  | 0.949347505 |
| SMU.849  | NC_004350.2:797718-798011 | protein_coding | 0.122386011  | 0.453103346 |
| SMU.850  | NC_004350.2:798325-799020 | protein_coding | 0.634290934  | 0.056860256 |
| SMU.851  | NC_004350.2:799021-799512 | protein_coding | 0.539872912  | 0.143611082 |
| SMU.852  | NC_004350.2:800165-801070 | protein_coding | -0.270309629 | 0.172402294 |
| SMU.853  | NC_004350.2:801079-801540 | protein_coding | -0.424337757 | 0.212213069 |
| SMU.854  | NC_004350.2:801530-802420 | protein_coding | -0.399991483 | 0.07437707  |
| SMU.855  | NC_004350.2:802622-803194 | protein_coding | -0.921874313 | 1.17425E-08 |
| SMU.856  | NC_004350.2:803417-803947 | protein_coding | -0.440318348 | 0.058016489 |
| SMU.857  | NC_004350.2:803944-805209 | protein_coding | -0.552658451 | 0.000412943 |
| SMU.858  | NC_004350.2:805214-806140 | protein_coding | -0.262805839 | 0.034622871 |
| SMU.859  | NC_004350.2:806269-807357 | protein_coding | -0.279889891 | 0.011432449 |
| SMU.860  | NC_004350.2:807537-810716 | protein_coding | -0.553344783 | 1.21799E-09 |
| SMU.862  | NC_004350.2:811016-812317 | protein_coding | 0.353976675  | 0.002117839 |
| SMU.863  | NC_004350.2:812323-813030 | protein_coding | 0.227464742  | 0.051908147 |
| SMU.864  | NC_004350.2:813040-814284 | protein_coding | -0.162278876 | 0.170700223 |
| SMU.865  | NC_004350.2:814687-814962 | protein_coding | -0.292190582 | 0.05100379  |
| SMU.866  | NC_004350.2:814973-815212 | protein_coding | -0.127307853 | 0.600519188 |
| SMU.867  | NC_004350.2:815301-815819 | protein_coding | 1.915518294  | 3.57545E-06 |
| SMU.868  | NC_004350.2:815809-816531 | protein_coding | 1.097570713  | 8.6688E-06  |
| SMU.869  | NC_004350.2:816615-817628 | protein_coding | 0.258155117  | 0.239910728 |
| SMU.870  | NC_004350.2:817781-818494 | protein_coding | 0.475963278  | 2.83115E-05 |
| SMU.871  | NC_004350.2:818491-819402 | protein_coding | 0.172756596  | 0.201616724 |
| SMU.872  | NC_004350.2:819399-821366 | protein_coding | 0.512392493  | 5.51245E-08 |
| SMU.873  | NC_004350.2:821698-823935 | protein_coding | 0.483252219  | 0.138191233 |
| SMU.874  | NC_004350.2:823953-825809 | protein_coding | 0.377254227  | 0.204835377 |
| SMU.875c | NC_004350.2:825849-826640 | protein_coding | 0.595813462  | 0.54813616  |
| NA       | NC_004350.2:826713-827033 | protein_coding | 0.403448862  | 0.892958702 |
| SMU.876  | NC_004350.2:827411-828247 | protein_coding | 0.948658995  | 0.004888913 |
| SMU.877  | NC_004350.2:828355-830517 | protein_coding | -4.387582529 | 0           |
| SMU.878  | NC_004350.2:830530-831792 | protein_coding | -3.880569945 | 0           |
| SMU.879  | NC_004350.2:831805-832677 | protein_coding | -3.57264208  | 2.0026E-255 |
| SMU.880  | NC_004350.2:832692-833525 | protein_coding | -2.808717537 | 1.5441E-187 |
| SMU.881  | NC_004350.2:833680-835125 | protein_coding | -3.088994205 | 0           |
| SMU.882  | NC_004350.2:835140-836273 | protein_coding | -2.103270988 | 1.0611E-166 |
| SMU.883  | NC_004350.2:836364-837974 | protein_coding | -2.165413354 | 2.24937E-97 |
| SMU.885  | NC_004350.2:838128-839126 | protein_coding | 0.567688779  | 2.40165E-05 |
| SMU.886  | NC_004350.2:839269-840441 | protein_coding | -2.525791378 | 3.0061E-140 |
| SMU.887  | NC_004350.2:840446-841921 | protein_coding | -1.856079382 | 1.01349E-77 |
| SMU.888  | NC_004350.2:842070-843071 | protein_coding | -2.277515749 | 2.0277E-103 |
| SMU.889  | NC_004350.2:843339-844418 | protein_coding | -2.482112888 | 1.5666E-146 |
| SMU.890  | NC_004350.2:844622-845164 | protein_coding | -1.308772312 | 5.15719E-09 |



|          |                           |                |              |             |
|----------|---------------------------|----------------|--------------|-------------|
| SMU.891  | NC_004350.2:845296-846900 | protein_coding | -1.148183678 | 3.5219E-12  |
| SMU.892  | NC_004350.2:846893-848704 | protein_coding | -1.195504516 | 1.17427E-19 |
| SMU.893  | NC_004350.2:848735-849880 | protein_coding | -0.519951185 | 3.06161E-05 |
| SMU.895  | NC_004350.2:849954-850226 | protein_coding | 0.438093714  | 0.584680127 |
| SMU.896  | NC_004350.2:850213-850491 | protein_coding | 0.273207924  | 0.583041704 |
| SMU.897  | NC_004350.2:850494-853541 | protein_coding | -0.191364143 | 0.091677634 |
| SMU.898  | NC_004350.2:853755-854129 | protein_coding | -0.333930926 | 0.05408176  |
| SMU.899  | NC_004350.2:854135-854980 | protein_coding | 0.092480608  | 0.465077655 |
| SMU.900  | NC_004350.2:854992-855759 | protein_coding | 0.531383168  | 0.000674714 |
| SMU.901  | NC_004350.2:855756-856961 | protein_coding | 0.466051092  | 0.000186582 |
| SMU.902  | NC_004350.2:856964-858832 | protein_coding | 0.113503661  | 0.327898727 |
| SMU.905  | NC_004350.2:859289-861025 | protein_coding | 0.13530963   | 0.346030098 |
| SMU.906  | NC_004350.2:861036-862808 | protein_coding | -0.361148074 | 0.004888854 |
| SMU.909  | NC_004350.2:862924-863844 | protein_coding | -0.098933563 | 0.632249635 |
| SMU.910  | NC_004350.2:864064-868452 | protein_coding | 1.231275522  | 9.16257E-31 |
| SMU.911c | NC_004350.2:868627-869136 | protein_coding | 0.382461249  | 0.080847635 |
| SMU.913  | NC_004350.2:869772-871121 | protein_coding | 0.834252092  | 2.94385E-07 |
| SMU.914c | NC_004350.2:871233-871616 | protein_coding | 0.916073572  | 3.69467E-05 |
| SMU.915c | NC_004350.2:871725-872213 | protein_coding | 0.465489331  | 0.031711464 |
| SMU.916c | NC_004350.2:872226-872942 | protein_coding | -0.007845268 | 0.979641793 |
| SMU.917c | NC_004350.2:872939-873385 | protein_coding | -0.00399665  | 0.992444396 |
| SMU.919c | NC_004350.2:873385-874038 | protein_coding | 0.462029887  | 0.173016123 |
| SMU.921  | NC_004350.2:874590-875024 | protein_coding | 2.568724066  | 4.0223E-34  |
| SMU.922  | NC_004350.2:875028-876830 | protein_coding | 2.257561813  | 4.18039E-68 |
| SMU.923  | NC_004350.2:876820-878574 | protein_coding | 1.14879024   | 5.41622E-23 |
| SMU.924  | NC_004350.2:878771-879256 | protein_coding | 2.553249589  | 1.83857E-35 |
| SMU.925  | NC_004350.2:879393-879863 | protein_coding | -1.130954823 | 6.7556E-11  |
| SMU.926  | NC_004350.2:880091-880714 | protein_coding | -0.581979261 | 0.000423712 |
| SMU.927  | NC_004350.2:880715-881401 | protein_coding | -0.537263772 | 0.011951329 |
| SMU.928  | NC_004350.2:881407-882639 | protein_coding | -0.81573809  | 8.6214E-08  |
| SMU.929c | NC_004350.2:882695-883045 | protein_coding | 1.040373408  | 4.06888E-06 |
| SMU.930c | NC_004350.2:883192-884103 | protein_coding | 0.522078179  | 0.10241273  |
| SMU.932  | NC_004350.2:884361-885368 | protein_coding | -1.919354509 | 2.58835E-07 |
| SMU.933  | NC_004350.2:885392-886246 | protein_coding | -1.776804263 | 1.27208E-11 |
| SMU.934  | NC_004350.2:886256-886948 | protein_coding | -2.018858476 | 1.07305E-18 |
| SMU.935  | NC_004350.2:886957-887631 | protein_coding | -2.008060085 | 4.91799E-18 |
| SMU.936  | NC_004350.2:887641-888405 | protein_coding | -2.432455206 | 3.30486E-19 |
| SMU.937  | NC_004350.2:888612-889544 | protein_coding | -1.292352235 | 2.39508E-08 |
| SMU.938  | NC_004350.2:889546-890544 | protein_coding | -0.936442706 | 1.36788E-06 |
| SMU.939  | NC_004350.2:890554-891549 | protein_coding | -1.149902869 | 1.03699E-09 |
| SMU.940c | NC_004350.2:891632-892288 | protein_coding | 1.76296881   | 8.13465E-26 |
| SMU.941c | NC_004350.2:892257-892727 | protein_coding | 1.930515586  | 2.22182E-40 |
| SMU.942  | NC_004350.2:892870-894153 | protein_coding | 0.131802609  | 0.449016401 |
| SMU.943c | NC_004350.2:894131-895306 | protein_coding | 0.450976039  | 0.001302861 |
| SMU.944  | NC_004350.2:895514-896353 | protein_coding | 0.52007102   | 0.008868218 |
| SMU.946  | NC_004350.2:896470-897249 | protein_coding | 0.404261595  | 0.080875894 |
| SMU.947  | NC_004350.2:897334-897846 | protein_coding | 1.290262538  | 2.89879E-11 |
| SMU.949  | NC_004350.2:898059-899291 | protein_coding | 0.825669775  | 5.33577E-09 |
| SMU.950  | NC_004350.2:899307-899900 | protein_coding | 0.518329884  | 0.006110927 |
| SMU.951  | NC_004350.2:900229-901605 | protein_coding | 1.619850363  | 1.84344E-10 |
| SMU.952  | NC_004350.2:901615-902565 | protein_coding | 0.342221093  | 0.14388468  |
| SMU.953c | NC_004350.2:902699-903961 | protein_coding | 2.637811843  | 1.96466E-57 |
| SMU.954  | NC_004350.2:904059-904910 | protein_coding | -1.887712112 | 5.23243E-18 |
| SMU.955  | NC_004350.2:904907-905440 | protein_coding | -1.728139567 | 3.63327E-08 |
| SMU.956  | NC_004350.2:905494-907599 | protein_coding | 2.386651162  | 5.72E-124   |
| SMU.957  | NC_004350.2:907994-908497 | protein_coding | -0.318919993 | 0.034447724 |
| SMU.960  | NC_004350.2:908563-908931 | protein_coding | -0.15194081  | 0.364880899 |
| SMU.961  | NC_004350.2:909198-909749 | protein_coding | 1.590167979  | 6.6726E-05  |
| SMU.962  | NC_004350.2:909770-910837 | protein_coding | 0.404357989  | 0.202122562 |

|           |                           |                |              |             |
|-----------|---------------------------|----------------|--------------|-------------|
| SMU.963c  | NC_004350.2:911429-912328 | protein_coding | -1.372756009 | 1.36348E-39 |
| SMU.965   | NC_004350.2:912434-913720 | protein_coding | 0.706830846  | 1.19714E-06 |
| SMU.966   | NC_004350.2:913722-914588 | protein_coding | 0.812237089  | 5.21636E-09 |
| SMU.967   | NC_004350.2:914758-916035 | protein_coding | 0.486579088  | 0.000178243 |
| SMU.968   | NC_004350.2:916056-916619 | protein_coding | 0.440517174  | 0.01973838  |
| SMU.969   | NC_004350.2:916629-917429 | protein_coding | 0.207487933  | 0.176440905 |
| SMU.970   | NC_004350.2:917437-917799 | protein_coding | -0.064096391 | 0.764433552 |
| SMU.971   | NC_004350.2:917796-918275 | protein_coding | -0.134773712 | 0.433709403 |
| SMU.972   | NC_004350.2:918410-919330 | protein_coding | -0.374413855 | 0.008014318 |
| SMU.973   | NC_004350.2:919334-920488 | protein_coding | -0.567456579 | 8.27186E-05 |
| SMU.974   | NC_004350.2:920472-921266 | protein_coding | -0.861864647 | 2.54647E-09 |
| SMU.975   | NC_004350.2:921263-922039 | protein_coding | -0.714995905 | 4.10732E-07 |
| SMU.976   | NC_004350.2:922032-923105 | protein_coding | -0.658306204 | 3.3363E-06  |
| SMU.977   | NC_004350.2:923185-924027 | pseudogene     | -0.36055414  | 0.024961285 |
| SMU.980   | NC_004350.2:924428-926362 | protein_coding | 1.053479904  | 3.80186E-09 |
| NA        | NC_004350.2:926535-928017 | pseudogene     | 1.664000846  | 1.84213E-08 |
| SMU.983   | NC_004350.2:928250-929155 | protein_coding | -0.413048739 | 0.0187832   |
| SMU.984   | NC_004350.2:929340-929840 | protein_coding | -2.99228967  | 9.74162E-97 |
| SMU.985   | NC_004350.2:929974-931410 | protein_coding | -1.082311785 | 4.34541E-15 |
| SMU.986c  | NC_004350.2:931498-932013 | protein_coding | -2.448814779 | 1.08943E-43 |
| SMU.987   | NC_004350.2:932362-933723 | protein_coding | 0.164161709  | 0.279072151 |
| SMU.988   | NC_004350.2:933887-935425 | protein_coding | 0.431857374  | 0.001010739 |
| NA        | NC_004350.2:935530-935658 | protein_coding | 1.678942885  | 0.002050178 |
| SMU.989   | NC_004350.2:935710-936786 | protein_coding | 0.378408528  | 0.000358858 |
| SMU.990   | NC_004350.2:936827-937708 | protein_coding | -0.084510752 | 0.43917625  |
| SMU.991   | NC_004350.2:938016-938354 | protein_coding | 0.254331373  | 0.237465095 |
| SMU.992   | NC_004350.2:938639-939604 | protein_coding | 1.779290444  | 9.00509E-21 |
| SMU.993   | NC_004350.2:939801-940652 | protein_coding | 1.306480746  | 1.5105E-20  |
| SMU.994   | NC_004350.2:940639-941421 | protein_coding | 1.01646022   | 1.21614E-07 |
| SMU.995   | NC_004350.2:941595-942557 | protein_coding | 0.989034832  | 4.17403E-11 |
| SMU.996   | NC_004350.2:942554-943525 | protein_coding | 0.889194092  | 9.52225E-09 |
| SMU.997   | NC_004350.2:943522-944328 | protein_coding | 0.91498659   | 1.27287E-10 |
| SMU.998   | NC_004350.2:944376-945392 | protein_coding | 0.71067158   | 4.0344E-08  |
| SMU.999   | NC_004350.2:945464-945745 | protein_coding | -0.927296852 | 0.007305708 |
| SMU.1001  | NC_004350.2:945912-946754 | protein_coding | -5.195105396 | 6.1232E-157 |
| SMU.1002  | NC_004350.2:946849-948966 | protein_coding | -3.393012136 | 2.6222E-135 |
| SMU.1003  | NC_004350.2:949332-950666 | protein_coding | -3.075586379 | 7.6303E-114 |
| SMU.1004  | NC_004350.2:951112-955542 | protein_coding | 0.852745269  | 1.63329E-11 |
| SMU.1005  | NC_004350.2:955738-960105 | protein_coding | 0.429337824  | 0.004888913 |
| SMU.1006  | NC_004350.2:960370-961122 | protein_coding | 0.508184663  | 0.212213069 |
| SMU.1007  | NC_004350.2:961124-963127 | protein_coding | 0.265377141  | 0.374221726 |
| SMU.1008  | NC_004350.2:963169-963840 | protein_coding | -0.317154859 | 0.244082286 |
| SMU.1009  | NC_004350.2:963837-964790 | protein_coding | -0.108670596 | 0.637917916 |
| SMU.1010  | NC_004350.2:964941-965990 | protein_coding | -1.732361365 | 2.08255E-31 |
| SMU.1011  | NC_004350.2:966166-967056 | protein_coding | -1.877300829 | 1.37626E-28 |
| SMU.1012c | NC_004350.2:967062-967751 | protein_coding | -1.854104984 | 5.10708E-22 |
| SMU.1013c | NC_004350.2:967981-969384 | protein_coding | -1.922590883 | 3.5035E-49  |
| SMU.1014  | NC_004350.2:969678-970007 | protein_coding | -1.685833136 | 1.04981E-24 |
| SMU.1016  | NC_004350.2:970026-970418 | protein_coding | -2.166425125 | 6.19462E-28 |
| SMU.1017  | NC_004350.2:970441-971562 | protein_coding | -2.180662895 | 2.01956E-76 |
| SMU.1019  | NC_004350.2:971809-972117 | protein_coding | -2.306533508 | 6.00996E-45 |
| SMU.1020  | NC_004350.2:972105-973007 | protein_coding | -1.883532845 | 1.27889E-59 |
| SMU.1021  | NC_004350.2:972994-974529 | protein_coding | -2.243534957 | 5.12078E-96 |
| SMU.1022  | NC_004350.2:974522-975058 | protein_coding | -2.121384447 | 1.09581E-53 |
| SMU.1023  | NC_004350.2:975071-976462 | protein_coding | -2.270449242 | 4.67007E-76 |
| SMU.1024c | NC_004350.2:976530-976667 | pseudogene     | 3.190284595  | 0.186040485 |
| SMU.1025  | NC_004350.2:976838-977263 | protein_coding | 0.955207478  | 0.037584987 |
| SMU.1026  | NC_004350.2:977310-977690 | protein_coding | 1.29150423   | 0.001955959 |
| SMU.1027  | NC_004350.2:977808-978446 | protein_coding | 2.148216594  | 2.0066E-32  |

|           |                             |                |              |             |
|-----------|-----------------------------|----------------|--------------|-------------|
| SMU.1028  | NC_004350.2:978482-979516   | protein_coding | 2.472567708  | 4.8787E-81  |
| NA        | NC_004350.2:979522-979710   | protein_coding | 1.870026565  | 3.84249E-12 |
| SMU.1029  | NC_004350.2:980040-980479   | pseudogene     | 3.583625466  | 0.107136793 |
| SMU.1030  | NC_004350.2:980476-980706   | protein_coding | 2.372502883  | 0.378828854 |
| SMU.1031  | NC_004350.2:981073-981276   | protein_coding | 1.950456055  | 0.615382071 |
| SMU.1032  | NC_004350.2:981357-982572   | pseudogene     | 1.683184455  | 0.000178673 |
| SMU.1034c | NC_004350.2:982973-984043   | protein_coding | 0.538916493  | 2.6292E-05  |
| SMU.1035  | NC_004350.2:984162-985043   | protein_coding | 2.062325787  | 1.72243E-06 |
| SMU.1036  | NC_004350.2:985064-985807   | protein_coding | 2.395157536  | 1.23355E-08 |
| SMU.1037c | NC_004350.2:985855-986733   | protein_coding | 1.77429056   | 2.26887E-46 |
| SMU.1038c | NC_004350.2:986733-987425   | protein_coding | -0.933884999 | 1.49713E-14 |
| SMU.1039c | NC_004350.2:987558-988391   | protein_coding | -1.069090922 | 5.01678E-18 |
| SMU.1040c | NC_004350.2:988407-989162   | protein_coding | -1.088992108 | 9.94891E-13 |
| SMU.1041  | NC_004350.2:989323-990069   | protein_coding | -2.018128688 | 6.37485E-31 |
| SMU.1042  | NC_004350.2:990066-991673   | protein_coding | -2.743459398 | 5.37086E-84 |
| SMU.1043c | NC_004350.2:991774-992769   | protein_coding | -1.318364872 | 1.76665E-29 |
| SMU.1044c | NC_004350.2:992786-993676   | protein_coding | 0.35424655   | 0.009894929 |
| SMU.1045c | NC_004350.2:993673-994506   | protein_coding | 0.37757474   | 0.017301445 |
| SMU.1046c | NC_004350.2:994481-995146   | protein_coding | 1.028023741  | 1.37781E-11 |
| NA        | NC_004350.2:995233-995412   | protein_coding | 0.453706553  | 0.137649656 |
| SMU.1048  | NC_004350.2:995645-996211   | protein_coding | 0.296543584  | 0.291422147 |
| SMU.1050  | NC_004350.2:996314-997294   | protein_coding | -1.37416265  | 1.16017E-30 |
| SMU.1051  | NC_004350.2:997298-998416   | protein_coding | -1.192388487 | 6.64386E-30 |
| SMU.1052  | NC_004350.2:998418-998765   | protein_coding | -1.599352027 | 3.08075E-45 |
| SMU.1053  | NC_004350.2:999061-999702   | protein_coding | -0.498903013 | 0.030417868 |
| SMU.1054  | NC_004350.2:999726-1000421  | protein_coding | -0.255669583 | 0.307786804 |
| SMU.1055  | NC_004350.2:1000418-1001098 | protein_coding | -3.208941489 | 1.3558E-116 |
| SMU.1057  | NC_004350.2:1001196-1001933 | protein_coding | -0.329633299 | 0.109412096 |
| SMU.1058  | NC_004350.2:1001930-1002598 | protein_coding | -0.670247884 | 6.30823E-08 |
| SMU.1059  | NC_004350.2:1002695-1003222 | protein_coding | 0.03088638   | 0.857423798 |
| SMU.1060  | NC_004350.2:1003242-1004792 | protein_coding | 0.138811046  | 0.20178875  |
| SMU.1061  | NC_004350.2:1004905-1005237 | protein_coding | 0.73368894   | 4.86791E-06 |
| SMU.1062  | NC_004350.2:1005347-1007077 | protein_coding | 3.485188423  | 3.303E-212  |
| SMU.1063  | NC_004350.2:1007080-1008294 | protein_coding | 4.146996426  | 1.8961E-179 |
| SMU.1064c | NC_004350.2:1008567-1009199 | protein_coding | -0.276873203 | 0.410180174 |
| SMU.1065c | NC_004350.2:1009203-1009901 | protein_coding | -0.849381595 | 0.000113464 |
| SMU.1066  | NC_004350.2:1010105-1011658 | protein_coding | 0.365514465  | 0.016988599 |
| SMU.1067c | NC_004350.2:1011784-1012572 | protein_coding | -2.156634439 | 9.4152E-104 |
| SMU.1068c | NC_004350.2:1012553-1013413 | protein_coding | -1.951352101 | 1.46632E-75 |
| SMU.1069c | NC_004350.2:1013423-1013869 | protein_coding | -2.01885808  | 1.27806E-46 |
| SMU.1070c | NC_004350.2:1013859-1014386 | protein_coding | -2.315839586 | 2.74899E-73 |
| SMU.1071c | NC_004350.2:1014550-1015401 | protein_coding | 1.799557944  | 2.5562E-15  |
| SMU.1072c | NC_004350.2:1015450-1015941 | protein_coding | 5.377618282  | 1.83346E-06 |
| SMU.1073  | NC_004350.2:1016005-1017675 | protein_coding | 1.377461424  | 8.68767E-41 |
| SMU.1074  | NC_004350.2:1017842-1018528 | protein_coding | -1.628244447 | 4.57343E-17 |
| SMU.1075  | NC_004350.2:1018521-1019060 | protein_coding | -1.267565702 | 5.7938E-12  |
| SMU.1076  | NC_004350.2:1019135-1019707 | protein_coding | -0.649471647 | 0.000248552 |
| SMU.1077  | NC_004350.2:1019802-1021517 | protein_coding | -1.850174003 | 7.32444E-76 |
| SMU.1078c | NC_004350.2:1021648-1023393 | protein_coding | -0.784207591 | 6.28624E-09 |
| SMU.1079c | NC_004350.2:1023390-1025123 | protein_coding | -0.648340477 | 1.6338E-06  |
| SMU.1080c | NC_004350.2:1025133-1025747 | protein_coding | -0.216625275 | 0.149979833 |
| SMU.1081c | NC_004350.2:1025749-1026726 | protein_coding | -0.538141118 | 2.37693E-05 |
| SMU.1082  | NC_004350.2:1026723-1027985 | protein_coding | 0.11510334   | 0.433709403 |
| SMU.1083c | NC_004350.2:1027995-1028585 | protein_coding | 0.527996501  | 0.00434026  |
| SMU.1084  | NC_004350.2:1028578-1029414 | protein_coding | 0.080726069  | 0.601265684 |
| SMU.1085  | NC_004350.2:1029411-1030490 | protein_coding | 0.872652524  | 1.03018E-07 |
| SMU.1086  | NC_004350.2:1030550-1031125 | protein_coding | -0.351399491 | 0.040701418 |
| SMU.1087  | NC_004350.2:1031284-1031469 | protein_coding | -1.151833119 | 0.000242761 |
| SMU.1088  | NC_004350.2:1031551-1032486 | protein_coding | -2.555525257 | 3.97533E-97 |

|           |                             |                |              |             |
|-----------|-----------------------------|----------------|--------------|-------------|
| SMU.1089  | NC_004350.2:1032511-1033113 | protein_coding | -2.108182499 | 2.44033E-82 |
| SMU.1090  | NC_004350.2:1033133-1034392 | protein_coding | -2.347141874 | 1.956E-133  |
| SMU.1091  | NC_004350.2:1034634-1036157 | protein_coding | 0.973365253  | 7.73887E-14 |
| SMU.1093  | NC_004350.2:1036487-1037995 | protein_coding | 0.265698499  | 0.521712043 |
| SMU.1094  | NC_004350.2:1038011-1038667 | protein_coding | 0.45435507   | 0.432019831 |
| SMU.1095  | NC_004350.2:1038786-1040306 | protein_coding | -0.777030103 | 1.87903E-07 |
| SMU.1096  | NC_004350.2:1040306-1041028 | protein_coding | -0.43065419  | 0.01120457  |
| SMU.1097c | NC_004350.2:1041025-1041507 | protein_coding | -0.210995545 | 0.33255999  |
| SMU.1098c | NC_004350.2:1041507-1042469 | protein_coding | 0.195337421  | 0.324805573 |
| SMU.1100c | NC_004350.2:1042742-1043866 | protein_coding | 1.219497628  | 4.76965E-13 |
| SMU.1102  | NC_004350.2:1044251-1045687 | protein_coding | -0.00870673  | 0.959619536 |
| SMU.1104c | NC_004350.2:1045700-1046293 | pseudogene     | 0.302507805  | 0.255503586 |
| SMU.1105c | NC_004350.2:1046290-1046904 | protein_coding | 0.011944943  | 0.963547068 |
| SMU.1106c | NC_004350.2:1046916-1047512 | protein_coding | -0.105397675 | 0.677719422 |
| SMU.1107c | NC_004350.2:1048069-1048710 | protein_coding | 0.180481802  | 0.352088657 |
| SMU.1108c | NC_004350.2:1048776-1049588 | protein_coding | 0.323121889  | 0.075408456 |
| SMU.1109c | NC_004350.2:1049803-1051056 | protein_coding | 0.736646498  | 3.38476E-08 |
| SMU.1111c | NC_004350.2:1051336-1052307 | protein_coding | 0.458383298  | 0.002538473 |
| SMU.1112c | NC_004350.2:1052392-1052796 | protein_coding | 0.872136569  | 3.41135E-07 |
| SMU.1113  | NC_004350.2:1053014-1053754 | protein_coding | 0.435398738  | 0.000985267 |
| SMU.1114  | NC_004350.2:1053761-1056223 | protein_coding | 0.445609281  | 4.26378E-06 |
| SMU.1115  | NC_004350.2:1056409-1057395 | protein_coding | -0.657248354 | 8.51537E-14 |
| SMU.1116c | NC_004350.2:1057457-1058593 | protein_coding | 0.745203981  | 1.97271E-15 |
| SMU.1117  | NC_004350.2:1058760-1060133 | protein_coding | 2.010346785  | 2.37291E-63 |
| SMU.1118c | NC_004350.2:1060373-1061329 | protein_coding | -1.340591756 | 1.22428E-26 |
| SMU.1119c | NC_004350.2:1061331-1062407 | protein_coding | -0.970832849 | 2.77186E-08 |
| SMU.1120  | NC_004350.2:1062400-1063932 | protein_coding | -1.00385258  | 4.92059E-19 |
| SMU.1121c | NC_004350.2:1064050-1065099 | protein_coding | -0.978282763 | 1.81581E-19 |
| SMU.1122  | NC_004350.2:1065189-1065575 | protein_coding | -0.91534089  | 2.44285E-11 |
| SMU.1123  | NC_004350.2:1065565-1066227 | protein_coding | -1.292947961 | 2.22123E-21 |
| SMU.1124  | NC_004350.2:1066246-1067523 | protein_coding | -2.193237959 | 8.09109E-44 |
| SMU.1125c | NC_004350.2:1067632-1068228 | protein_coding | -2.313151978 | 6.32581E-30 |
| SMU.1126  | NC_004350.2:1068324-1069244 | protein_coding | -2.205023376 | 3.12473E-42 |
| SMU.1127  | NC_004350.2:1069298-1069552 | protein_coding | -1.374548863 | 0.001780857 |
| SMU.1128  | NC_004350.2:1069642-1070949 | protein_coding | -1.006421237 | 1.7948E-14  |
| SMU.1129  | NC_004350.2:1070939-1071613 | protein_coding | -0.615850145 | 0.005423761 |
| SMU.1131c | NC_004350.2:1071664-1071927 | protein_coding | 0.366789786  | 0.533793986 |
| SMU.1132  | NC_004350.2:1072328-1074877 | protein_coding | -0.289710029 | 0.004633157 |
| SMU.1133  | NC_004350.2:1074918-1075571 | protein_coding | -0.978326604 | 1.24786E-07 |
| SMU.1134c | NC_004350.2:1075603-1076361 | protein_coding | -0.615843424 | 4.92709E-05 |
| SMU.1135  | NC_004350.2:1076373-1077176 | protein_coding | -0.724017847 | 2.12852E-06 |
| SMU.1136  | NC_004350.2:1077192-1078079 | protein_coding | -0.302049684 | 0.032652128 |
| SMU.1137  | NC_004350.2:1078069-1079004 | protein_coding | -0.014715745 | 0.933614457 |
| SMU.1138  | NC_004350.2:1079077-1079940 | protein_coding | 0.081663829  | 0.69596838  |
| SMU.1139c | NC_004350.2:1080037-1081347 | protein_coding | 0.189928451  | 0.26724421  |
| SMU.1140c | NC_004350.2:1081411-1082169 | protein_coding | 0.857971838  | 0.000230377 |
| SMU.1141c | NC_004350.2:1082159-1082437 | protein_coding | 1.251718312  | 0.11072408  |
| SMU.1142c | NC_004350.2:1082430-1082843 | protein_coding | -1.096441957 | 4.93263E-14 |
| SMU.1143c | NC_004350.2:1082904-1083824 | protein_coding | 0.566069815  | 0.0013767   |
| SMU.1144  | NC_004350.2:1083855-1084736 | protein_coding | -0.214679136 | 0.218713027 |
| SMU.1145c | NC_004350.2:1084846-1086159 | protein_coding | -1.091410397 | 3.01533E-08 |
| SMU.1146c | NC_004350.2:1086160-1086849 | protein_coding | -1.01756943  | 0.000752331 |
| SMU.1148  | NC_004350.2:1087024-1087932 | protein_coding | 3.276829171  | 1.12213E-10 |
| SMU.1149  | NC_004350.2:1087932-1088672 | protein_coding | 3.853472259  | 2.15964E-10 |
| SMU.1150  | NC_004350.2:1088669-1089397 | protein_coding | 3.520771718  | 2.27059E-10 |
| SMU.1151c | NC_004350.2:1089516-1090880 | protein_coding | -1.661443235 | 2.80131E-50 |
| SMU.1152c | NC_004350.2:1090880-1091113 | protein_coding | -2.319878162 | 6.48673E-16 |
| SMU.1153c | NC_004350.2:1091286-1092197 | protein_coding | -2.183189157 | 9.66886E-49 |
| NA        | NC_004350.2:1092296-1092487 | pseudogene     | -2.07882955  | 5.88107E-22 |

|           |                             |                |              |             |
|-----------|-----------------------------|----------------|--------------|-------------|
| SMU.1154c | NC_004350.2:1092616-1092912 | protein_coding | -1.730050428 | 4.49302E-08 |
| SMU.1156c | NC_004350.2:1092916-1093350 | protein_coding | -1.939393502 | 6.19968E-14 |
| SMU.1157c | NC_004350.2:1093482-1096667 | protein_coding | -1.999813546 | 3.08655E-42 |
| SMU.1158c | NC_004350.2:1096679-1097935 | protein_coding | -1.802546951 | 4.10971E-28 |
| SMU.1160c | NC_004350.2:1098230-1099252 | protein_coding | -2.321381093 | 6.60696E-47 |
| SMU.1161c | NC_004350.2:1099325-1100071 | protein_coding | -1.951813796 | 1.3482E-16  |
| SMU.1163c | NC_004350.2:1100349-1102094 | protein_coding | -0.031438517 | 0.872394781 |
| SMU.1164c | NC_004350.2:1102087-1103859 | protein_coding | 0.071811791  | 0.760233023 |
| SMU.1165c | NC_004350.2:1103870-1104481 | protein_coding | -0.261166846 | 0.667079609 |
| SMU.1166c | NC_004350.2:1104674-1107307 | protein_coding | 0.874565591  | 1.76397E-06 |
| SMU.1167c | NC_004350.2:1107323-1108024 | protein_coding | 1.231310716  | 0.00869787  |
| SMU.1168  | NC_004350.2:1108137-1108685 | protein_coding | 1.155164682  | 0.000494474 |
| SMU.1169c | NC_004350.2:1108809-1109372 | protein_coding | 0.115653369  | 0.600519188 |
| SMU.1170  | NC_004350.2:1109386-1110099 | protein_coding | 0.213934743  | 0.362423864 |
| SMU.1171c | NC_004350.2:1110296-1111066 | protein_coding | -0.645021012 | 0.003827511 |
| SMU.1172c | NC_004350.2:1111163-1111903 | protein_coding | -1.716184494 | 8.45985E-61 |
| SMU.1173  | NC_004350.2:1111917-1113197 | protein_coding | -1.512802711 | 4.25432E-55 |
| SMU.1174  | NC_004350.2:1113511-1115787 | protein_coding | -1.514665556 | 1.77337E-57 |
| SMU.1175  | NC_004350.2:1116158-1117522 | protein_coding | 2.817912703  | 2.71589E-20 |
| SMU.1176  | NC_004350.2:1117621-1118811 | protein_coding | 1.327657708  | 1.02707E-10 |
| SMU.1177c | NC_004350.2:1118934-1119767 | protein_coding | -0.529032526 | 0.000227292 |
| SMU.1178c | NC_004350.2:1119789-1120418 | protein_coding | -0.49248769  | 0.004211953 |
| SMU.1179c | NC_004350.2:1120427-1121068 | protein_coding | -0.361127789 | 0.021460435 |
| SMU.1180  | NC_004350.2:1121259-1121591 | protein_coding | -0.856796482 | 2.26157E-06 |
| SMU.1182  | NC_004350.2:1121766-1122914 | protein_coding | -0.625808457 | 3.29336E-05 |
| SMU.1183  | NC_004350.2:1122930-1123367 | protein_coding | -0.539461507 | 0.036448463 |
| SMU.1184c | NC_004350.2:1123369-1125321 | protein_coding | -0.688471506 | 4.87232E-08 |
| SMU.1185  | NC_004350.2:1125351-1127120 | protein_coding | -0.016256029 | 0.938292359 |
| SMU.1187  | NC_004350.2:1127608-1129422 | protein_coding | 0.978642385  | 1.34042E-15 |
| SMU.1188  | NC_004350.2:1129595-1130149 | protein_coding | -0.246537938 | 0.194803323 |
| SMU.1189c | NC_004350.2:1130228-1130470 | protein_coding | 0.666615367  | 0.034948515 |
| SMU.1190  | NC_004350.2:1130761-1132263 | protein_coding | -1.023978253 | 4.36064E-26 |
| SMU.1191  | NC_004350.2:1132337-1133350 | protein_coding | -0.920294986 | 1.45808E-14 |
| SMU.1192  | NC_004350.2:1133433-1136537 | protein_coding | -1.016581247 | 4.18994E-32 |
| SMU.1193  | NC_004350.2:1136715-1137086 | protein_coding | -1.216595228 | 4.10544E-12 |
| SMU.1194  | NC_004350.2:1137083-1137790 | protein_coding | -0.85213016  | 1.18473E-08 |
| SMU.1195  | NC_004350.2:1137800-1138618 | protein_coding | -0.452385207 | 0.002465317 |
| SMU.1196c | NC_004350.2:1138671-1139291 | protein_coding | 0.169863527  | 0.439012324 |
| NA        | NC_004350.2:1139336-1139684 | tmRNA          | -4.791282257 | 0           |
| SMU.1197  | NC_004350.2:1139764-1140378 | protein_coding | 0.210860428  | 0.246919726 |
| SMU_t37   | NC_004350.2:1140675-1140746 | tRNA           | 6.518131524  | 5.57096E-07 |
| SMU.1200  | NC_004350.2:1140884-1142083 | protein_coding | 1.573901535  | 2.8337E-41  |
| SMU_t38   | NC_004350.2:1142216-1142287 | tRNA           | 2.644092835  | 8.0271E-07  |
| SMU_t39   | NC_004350.2:1142444-1142524 | tRNA           | 4.092644755  | 0.007604078 |
| SMU.1201c | NC_004350.2:1142584-1142814 | protein_coding | -0.564991307 | 0.087915709 |
| SMU.1203  | NC_004350.2:1142879-1143934 | protein_coding | -1.020250718 | 5.13643E-15 |
| SMU.1204  | NC_004350.2:1144147-1146603 | protein_coding | -0.697267425 | 1.33051E-10 |
| SMU.1205c | NC_004350.2:1146796-1147362 | protein_coding | -0.357105838 | 0.039283756 |
| SMU.1206c | NC_004350.2:1147387-1147944 | protein_coding | -0.580256745 | 0.000250258 |
| SMU.1207  | NC_004350.2:1148062-1148667 | protein_coding | -0.873387245 | 2.38366E-07 |
| SMU.1208c | NC_004350.2:1148712-1149461 | protein_coding | -0.492676925 | 0.001001112 |
| SMU.1209c | NC_004350.2:1149743-1151083 | protein_coding | -0.531471216 | 2.12544E-05 |
| SMU.1210  | NC_004350.2:1151099-1153048 | protein_coding | -0.623909054 | 3.0364E-06  |
| SMU.1211  | NC_004350.2:1153161-1153799 | protein_coding | 0.187032257  | 0.346483774 |
| SMU.1213c | NC_004350.2:1153986-1156097 | protein_coding | -0.655030583 | 2.80593E-13 |
| SMU.1214  | NC_004350.2:1156286-1157554 | protein_coding | -0.618803284 | 1.06843E-06 |
| SMU.1215  | NC_004350.2:1157564-1158217 | protein_coding | -0.210043807 | 0.173222382 |
| SMU.1216c | NC_004350.2:1158240-1158893 | protein_coding | 0.07880283   | 0.727444384 |
| SMU.1217c | NC_004350.2:1159043-1159894 | protein_coding | -0.278362133 | 0.079440726 |

|           |                             |                |              |             |
|-----------|-----------------------------|----------------|--------------|-------------|
| SMU.1218  | NC_004350.2:1160009-1161451 | protein_coding | -0.143989542 | 0.350090521 |
| SMU.1219c | NC_004350.2:1161511-1161852 | protein_coding | 0.031737628  | 0.908635706 |
| SMU.1220c | NC_004350.2:1162026-1162526 | protein_coding | -0.590251841 | 3.62863E-06 |
| SMU.1221  | NC_004350.2:1162858-1163487 | protein_coding | -0.489613941 | 0.000326037 |
| SMU.1222  | NC_004350.2:1163588-1164280 | protein_coding | 0.132876274  | 0.468496459 |
| SMU.1223  | NC_004350.2:1164273-1165202 | protein_coding | 1.085854877  | 1.18023E-06 |
| SMU.1224  | NC_004350.2:1165212-1165988 | protein_coding | 1.162372552  | 2.87467E-07 |
| SMU.1225  | NC_004350.2:1166241-1167149 | protein_coding | 0.199429169  | 0.230047062 |
| SMU.1226c | NC_004350.2:1167215-1167982 | protein_coding | -0.693975822 | 1.14524E-07 |
| SMU.1227  | NC_004350.2:1167984-1168688 | protein_coding | -0.309634329 | 0.009103735 |
| SMU.1228c | NC_004350.2:1168902-1169612 | protein_coding | -0.462927976 | 0.000126709 |
| SMU.1229  | NC_004350.2:1169622-1170431 | protein_coding | -0.138160328 | 0.350514548 |
| SMU.1230c | NC_004350.2:1170442-1170918 | protein_coding | -0.097184291 | 0.443823419 |
| SMU.1232c | NC_004350.2:1171241-1171456 | protein_coding | -0.331009973 | 0.069085013 |
| SMU.1233  | NC_004350.2:1171458-1172669 | protein_coding | 0.02747235   | 0.81130033  |
| SMU.1234  | NC_004350.2:1172724-1173401 | protein_coding | 0.165357505  | 0.28272399  |
| SMU.1235  | NC_004350.2:1173530-1174897 | protein_coding | -0.476426192 | 0.000216616 |
| SMU.1236c | NC_004350.2:1175045-1175848 | protein_coding | 2.209793541  | 4.07523E-11 |
| SMU.1237c | NC_004350.2:1175866-1176216 | protein_coding | 2.750038801  | 3.79158E-07 |
| NA        | NC_004350.2:1176307-1176609 | protein_coding | -2.625610322 | 2.05246E-38 |
| SMU.1238c | NC_004350.2:1176737-1177324 | protein_coding | -1.476810015 | 1.20112E-43 |
| SMU.1239  | NC_004350.2:1177397-1178809 | protein_coding | -1.082848167 | 9.96068E-29 |
| SMU.1240c | NC_004350.2:1178824-1179426 | protein_coding | -0.84796334  | 1.85477E-11 |
| SMU.1241  | NC_004350.2:1179573-1181360 | protein_coding | -0.290919843 | 0.014027945 |
| SMU.1243  | NC_004350.2:1181478-1182621 | pseudogene     | 0.240140771  | 0.292235049 |
| SMU.1245c | NC_004350.2:1182665-1183360 | protein_coding | 0.169399371  | 0.338478616 |
| SMU.1246c | NC_004350.2:1183574-1183870 | protein_coding | 0.905573463  | 5.43756E-06 |
| SMU.1247  | NC_004350.2:1183934-1185232 | protein_coding | -0.659464582 | 2.82339E-13 |
| SMU.1249c | NC_004350.2:1185629-1186270 | protein_coding | 0.542249645  | 0.005224543 |
| SMU.1250c | NC_004350.2:1186308-1186577 | protein_coding | 0.746909218  | 0.01522281  |
| SMU.1251  | NC_004350.2:1186726-1187178 | protein_coding | -1.129155629 | 1.38143E-05 |
| SMU.1252  | NC_004350.2:1187255-1188367 | protein_coding | -0.467375077 | 0.002471248 |
| SMU.1253c | NC_004350.2:1188378-1188803 | protein_coding | -1.052255816 | 2.39295E-05 |
| SMU.1254  | NC_004350.2:1188892-1189536 | protein_coding | -0.89394057  | 1.14989E-05 |
| SMU.1255c | NC_004350.2:1189531-1189830 | protein_coding | -0.746290129 | 1.37056E-06 |
| SMU.1257c | NC_004350.2:1190156-1190827 | protein_coding | 0.055787386  | 0.679818246 |
| SMU.1258c | NC_004350.2:1190950-1191612 | protein_coding | 0.421868303  | 0.297233061 |
| SMU.1259  | NC_004350.2:1191675-1192001 | protein_coding | 2.538103067  | 0.009598545 |
| SMU.1260c | NC_004350.2:1192355-1192534 | protein_coding | -1.184849778 | 0.000744173 |
| NA        | NC_004350.2:1192547-1192861 | protein_coding | -1.163394913 | 1.78662E-06 |
| SMU.1262c | NC_004350.2:1192812-1194152 | protein_coding | -0.716548631 | 0.001559753 |
| SMU.1263  | NC_004350.2:1194266-1194595 | protein_coding | -0.300330645 | 0.315795548 |
| SMU.1264  | NC_004350.2:1194595-1195350 | protein_coding | -0.126149541 | 0.600519188 |
| SMU.1265  | NC_004350.2:1195353-1196072 | protein_coding | -0.437998333 | 0.018346707 |
| SMU.1266  | NC_004350.2:1196512-1197117 | protein_coding | -0.500979147 | 0.019101965 |
| SMU.1267c | NC_004350.2:1197114-1197467 | protein_coding | 0.134094111  | 0.667079609 |
| SMU.1268  | NC_004350.2:1197483-1198067 | protein_coding | -0.43775247  | 0.052823834 |
| SMU.1269  | NC_004350.2:1198064-1198711 | protein_coding | -0.225338914 | 0.273316855 |
| SMU.1270  | NC_004350.2:1198698-1199981 | protein_coding | 0.037945249  | 0.830857405 |
| SMU.1271  | NC_004350.2:1199978-1200625 | protein_coding | 0.340933885  | 0.341304458 |
| SMU.1272  | NC_004350.2:1200635-1201597 | protein_coding | 0.473788897  | 0.036288414 |
| SMU.1273  | NC_004350.2:1201594-1202643 | protein_coding | 1.074254631  | 4.0063E-06  |
| SMU.1276c | NC_004350.2:1203817-1205541 | protein_coding | 0.197065238  | 0.039813916 |
| SMU.1277  | NC_004350.2:1205637-1207589 | protein_coding | 0.543931517  | 9.67853E-09 |
| SMU.1278c | NC_004350.2:1207589-1208173 | protein_coding | 0.678609112  | 2.45646E-05 |
| SMU.1279c | NC_004350.2:1208595-1209821 | protein_coding | 0.384366951  | 0.007679818 |
| SMU.1280c | NC_004350.2:1210028-1211146 | protein_coding | 2.257812881  | 5.64927E-06 |
| SMU.1282  | NC_004350.2:1211285-1211851 | protein_coding | -0.146370032 | 0.530014312 |
| SMU_t40   | NC_004350.2:1211962-1212033 | tRNA           | 2.394516904  | 0.141593559 |

|           |                             |                |              |             |
|-----------|-----------------------------|----------------|--------------|-------------|
| SMU.1284c | NC_004350.2:1212113-1212772 | protein_coding | 3.389405008  | 4.05819E-37 |
| SMU.1286c | NC_004350.2:1212774-1213952 | protein_coding | 3.092063707  | 4.95307E-36 |
| SMU.1287  | NC_004350.2:1214103-1214453 | protein_coding | -1.736545089 | 1.42999E-08 |
| SMU.1288  | NC_004350.2:1214632-1214979 | protein_coding | 1.257801346  | 2.28395E-26 |
| SMU.1289c | NC_004350.2:1215168-1216388 | protein_coding | -0.188165514 | 0.185187875 |
| SMU.1290c | NC_004350.2:1216474-1217694 | protein_coding | -0.670722088 | 1.21626E-06 |
| SMU.1291c | NC_004350.2:1217684-1217956 | protein_coding | -1.295906396 | 0.000645303 |
| SMU.1292c | NC_004350.2:1218002-1218679 | protein_coding | -1.492743505 | 3.68352E-33 |
| SMU.1293c | NC_004350.2:1219101-1220483 | protein_coding | -2.269682602 | 1.6096E-104 |
| SMU.1294  | NC_004350.2:1220643-1221086 | protein_coding | 0.372946722  | 0.374145822 |
| SMU.1295  | NC_004350.2:1221145-1222194 | protein_coding | 1.486247083  | 1.28885E-07 |
| SMU.1296  | NC_004350.2:1222269-1223060 | protein_coding | 1.080521089  | 2.17264E-10 |
| SMU.1297  | NC_004350.2:1223132-1224064 | protein_coding | 3.33344958   | 1.31196E-79 |
| SMU.1298  | NC_004350.2:1224137-1224403 | protein_coding | 1.506908431  | 1.82963E-25 |
| SMU.1299c | NC_004350.2:1224443-1224766 | protein_coding | -1.294872715 | 1.40605E-06 |
| SMU.1300c | NC_004350.2:1224759-1225106 | protein_coding | -0.674383273 | 0.05120079  |
| SMU.1301c | NC_004350.2:1225160-1225915 | protein_coding | -0.508995432 | 0.028627668 |
| SMU.1302  | NC_004350.2:1226076-1227596 | protein_coding | -0.581663341 | 9.18565E-05 |
| SMU.1303c | NC_004350.2:1227823-1229220 | protein_coding | -1.306197614 | 5.13244E-41 |
| SMU.1304c | NC_004350.2:1229586-1230497 | protein_coding | -1.669107655 | 1.47298E-36 |
| SMU.1305c | NC_004350.2:1230494-1231471 | protein_coding | -1.4187811   | 2.96107E-26 |
| SMU.1306c | NC_004350.2:1231468-1232358 | protein_coding | -1.357474635 | 4.3414E-26  |
| SMU.1307c | NC_004350.2:1232351-1233109 | protein_coding | -1.412012839 | 1.27985E-28 |
| SMU.1308  | NC_004350.2:1233240-1233617 | protein_coding | -1.254427787 | 9.89321E-14 |
| SMU.1309c | NC_004350.2:1233647-1234738 | protein_coding | -0.976705537 | 1.25462E-10 |
| SMU.1311  | NC_004350.2:1235250-1236596 | protein_coding | -0.421500214 | 0.000130688 |
| SMU.1312  | NC_004350.2:1236643-1237824 | protein_coding | -0.148164682 | 0.292930339 |
| SMU.1313c | NC_004350.2:1237890-1240418 | protein_coding | 0.311710997  | 0.015012926 |
| SMU.1314  | NC_004350.2:1240611-1241444 | protein_coding | 0.550096829  | 0.000905797 |
| SMU.1315c | NC_004350.2:1241656-1242309 | protein_coding | 0.900597167  | 6.33372E-06 |
| SMU.1316c | NC_004350.2:1242311-1243042 | protein_coding | 0.290837367  | 0.403505621 |
| SMU.1317c | NC_004350.2:1243080-1243382 | protein_coding | -0.113263614 | 0.801946148 |
| NA        | NC_004350.2:1243388-1243573 | protein_coding | -0.671163701 | 0.114151655 |
| SMU.1319c | NC_004350.2:1244138-1244890 | protein_coding | 0.068080842  | 0.722522017 |
| SMU.1321c | NC_004350.2:1245032-1246210 | protein_coding | -0.126878094 | 0.470528673 |
| SMU.1322  | NC_004350.2:1246354-1247118 | protein_coding | -1.662898236 | 5.97941E-35 |
| SMU.1323  | NC_004350.2:1247243-1247881 | protein_coding | 0.075379037  | 0.73483265  |
| SMU.1324  | NC_004350.2:1248004-1248939 | protein_coding | 0.675457718  | 1.48379E-07 |
| SMU.1325  | NC_004350.2:1248932-1249624 | protein_coding | 1.084241449  | 6.04293E-17 |
| SMU.1326  | NC_004350.2:1249646-1250741 | protein_coding | 1.299071836  | 1.50294E-24 |
| SMU.1327c | NC_004350.2:1250791-1251915 | protein_coding | -0.34860421  | 0.16970744  |
| SMU.1329c | NC_004350.2:1252575-1253157 | pseudogene     | 0.908779935  | 0.007394752 |
| NA        | NC_004350.2:1253191-1254436 | pseudogene     | 1.07637832   | 0.004309139 |
| NA        | NC_004350.2:1254558-1254848 | pseudogene     | -2.863398613 | 2.0757E-109 |
| SMU.1334  | NC_004350.2:1255084-1255776 | protein_coding | -3.557629272 | 5.6942E-200 |
| SMU.1335c | NC_004350.2:1255804-1256787 | protein_coding | -3.050624227 | 3.7888E-117 |
| SMU.1336  | NC_004350.2:1256800-1257738 | protein_coding | -3.412781879 | 1.558E-153  |
| SMU.1337c | NC_004350.2:1257767-1258516 | protein_coding | -3.132189722 | 4.29741E-82 |
| SMU.1338c | NC_004350.2:1258545-1259762 | protein_coding | -3.066958728 | 1.55998E-84 |
| SMU.1339  | NC_004350.2:1259790-1264157 | protein_coding | -3.0587467   | 4.8385E-117 |
| SMU.1340  | NC_004350.2:1264255-1269141 | protein_coding | -3.11117308  | 4.5433E-135 |
| SMU.1341c | NC_004350.2:1269141-1272830 | protein_coding | -2.50986339  | 1.61842E-88 |
| SMU.1342  | NC_004350.2:1272849-1281023 | protein_coding | -2.312698342 | 2.41349E-59 |
| SMU.1343c | NC_004350.2:1281069-1284422 | protein_coding | -2.259674224 | 1.11547E-49 |
| SMU.1344c | NC_004350.2:1284428-1285645 | protein_coding | -2.151338882 | 1.23319E-22 |
| SMU.1345c | NC_004350.2:1285660-1287561 | protein_coding | -1.502195516 | 8.84641E-15 |
| SMU.1346  | NC_004350.2:1287573-1288292 | protein_coding | -1.570125184 | 8.4947E-15  |
| SMU.1347c | NC_004350.2:1288285-1290627 | protein_coding | -4.168869761 | 0.034817646 |
| SMU.1348c | NC_004350.2:1290632-1291333 | protein_coding | -1.835023839 | 0.126315218 |

|           |                             |                |              |             |
|-----------|-----------------------------|----------------|--------------|-------------|
| SMU.1349  | NC_004350.2:1291686-1292261 | protein_coding | -0.470935422 | 0.000793011 |
| NA        | NC_004350.2:1292447-1293377 | pseudogene     | -0.046582603 | 0.842601979 |
| NA        | NC_004350.2:1293395-1294552 | pseudogene     | -2.357487368 | 3.54985E-53 |
| SMU.1357  | NC_004350.2:1294643-1294970 | pseudogene     | 3.441854458  | 0.036767785 |
| SMU.1361c | NC_004350.2:1295378-1295959 | protein_coding | -2.63798597  | 2.767E-208  |
| NA        | NC_004350.2:1296600-1297064 | pseudogene     | -3.025608076 | 2.9082E-215 |
| SMU.1365c | NC_004350.2:1297315-1299657 | protein_coding | -3.176190913 | 3.185E-100  |
| SMU.1366c | NC_004350.2:1299662-1300363 | protein_coding | NA           | NA          |
| SMU.1367c | NC_004350.2:1300376-1300975 | protein_coding | -2.259777998 | 9.46843E-53 |
| SMU.1370c | NC_004350.2:1302181-1302972 | protein_coding | 1.59445482   | 0.142321036 |
| NA        | NC_004350.2:1303045-1303365 | protein_coding | 1.224375417  | 0.601265684 |
| SMU.1375c | NC_004350.2:1305078-1305683 | protein_coding | 0.653006896  | 0.000652961 |
| SMU.1377c | NC_004350.2:1305801-1306586 | protein_coding | -0.233038438 | 0.11278793  |
| SMU.1378  | NC_004350.2:1306651-1307187 | protein_coding | 0.118361315  | 0.813253329 |
| NA        | NC_004350.2:1307343-1308691 | protein_coding | -1.27369269  | 0.39049225  |
| SMU.1381  | NC_004350.2:1308800-1309390 | protein_coding | -0.673427251 | 1.15132E-07 |
| SMU.1382  | NC_004350.2:1309392-1310777 | protein_coding | -0.551326623 | 4.13683E-07 |
| SMU.1383  | NC_004350.2:1310903-1311937 | protein_coding | -1.037764118 | 1.12229E-16 |
| SMU.1384  | NC_004350.2:1311947-1313512 | protein_coding | -0.526973544 | 2.27661E-06 |
| SMU.1386  | NC_004350.2:1313838-1314467 | protein_coding | -0.575626676 | 0.001054342 |
| SMU.1387  | NC_004350.2:1314686-1315666 | protein_coding | -0.459546879 | 0.001631398 |
| SMU.1388  | NC_004350.2:1315663-1316745 | protein_coding | -0.533389704 | 0.000202466 |
| SMU.1389  | NC_004350.2:1316938-1318578 | protein_coding | -1.563207418 | 5.38675E-49 |
| SMU.1390  | NC_004350.2:1318897-1319553 | protein_coding | -0.023691597 | 0.949495232 |
| SMU.1391c | NC_004350.2:1319618-1320226 | protein_coding | -0.540401519 | 8.66148E-05 |
| SMU.1392c | NC_004350.2:1320306-1320782 | protein_coding | 0.963449013  | 1.52684E-11 |
| SMU.1393c | NC_004350.2:1320861-1321688 | protein_coding | 0.679301959  | 8.95184E-07 |
| SMU.1394  | NC_004350.2:1321717-1323552 | protein_coding | 1.267334658  | 4.16527E-29 |
| SMU.1396  | NC_004350.2:1324324-1326075 | protein_coding | 5.144248994  | 0           |
| SMU.1397c | NC_004350.2:1326238-1326523 | pseudogene     | -1.308307037 | 2.42112E-13 |
| SMU.1398  | NC_004350.2:1326838-1327731 | protein_coding | -2.992044173 | 2.3432E-113 |
| SMU.1400c | NC_004350.2:1328400-1328777 | protein_coding | -0.593781583 | 0.005754718 |
| NA        | NC_004350.2:1328795-1328986 | protein_coding | -1.195627559 | 0.000523265 |
| SMU.1402c | NC_004350.2:1329083-1329745 | protein_coding | -4.308632718 | 1.8857E-198 |
| SMU.1403c | NC_004350.2:1329735-1330079 | protein_coding | -3.765664087 | 1.31601E-38 |
| SMU.1404c | NC_004350.2:1330076-1330942 | protein_coding | -4.073075173 | 7.0767E-188 |
| SMU.1405c | NC_004350.2:1330942-1334979 | protein_coding | -3.995543608 | 0           |
| SMU.1406c | NC_004350.2:1335360-1336226 | protein_coding | -1.993575627 | 2.17638E-20 |
| NA        | NC_004350.2:1336342-1337690 | protein_coding | -0.466586551 | 0.922599346 |
| SMU.1409c | NC_004350.2:1337785-1338651 | protein_coding | -1.709670589 | 6.39692E-26 |
| SMU.1410  | NC_004350.2:1338776-1340209 | protein_coding | 1.332771427  | 4.3324E-06  |
| SMU.1411  | NC_004350.2:1340276-1341451 | protein_coding | 1.134867425  | 0.000279139 |
| SMU.1412c | NC_004350.2:1341627-1344155 | protein_coding | -1.599052199 | 2.24773E-47 |
| SMU.1414c | NC_004350.2:1344250-1344909 | protein_coding | -1.011411677 | 8.07639E-11 |
| SMU.1415c | NC_004350.2:1344899-1345672 | protein_coding | -1.038889847 | 1.13563E-14 |
| SMU.1416c | NC_004350.2:1345687-1346304 | protein_coding | -1.217767584 | 1.64216E-13 |
| SMU.1417c | NC_004350.2:1346325-1347053 | protein_coding | -0.927902194 | 6.0023E-08  |
| SMU.1418  | NC_004350.2:1347056-1348198 | protein_coding | -0.595759108 | 0.000863525 |
| SMU.1419  | NC_004350.2:1348733-1349329 | protein_coding | 3.080313234  | 7.56237E-63 |
| SMU.1420  | NC_004350.2:1349326-1349892 | protein_coding | 3.166599427  | 1.36098E-61 |
| SMU.1421  | NC_004350.2:1349952-1351205 | protein_coding | -1.997900888 | 2.3558E-81  |
| SMU.1422  | NC_004350.2:1351219-1352250 | protein_coding | -1.97375916  | 8.32854E-74 |
| SMU.1423  | NC_004350.2:1352263-1353336 | protein_coding | -2.152120051 | 9.01059E-58 |
| SMU.1424  | NC_004350.2:1353362-1354699 | protein_coding | -2.468521887 | 2.64386E-92 |
| SMU.1425  | NC_004350.2:1354928-1357510 | protein_coding | -1.750404035 | 9.00372E-35 |
| SMU.1426c | NC_004350.2:1357703-1359052 | protein_coding | -0.373777063 | 0.000261165 |
| SMU.1427c | NC_004350.2:1359103-1360059 | protein_coding | 0.036741152  | 0.763979825 |
| SMU.1428c | NC_004350.2:1360052-1360906 | protein_coding | 0.243529228  | 0.106283861 |
| SMU.1429  | NC_004350.2:1361015-1362358 | protein_coding | 0.642513724  | 4.40169E-05 |



|           |                             |                |              |             |
|-----------|-----------------------------|----------------|--------------|-------------|
| SMU.1430  | NC_004350.2:1362358-1363146 | protein_coding | 0.671872064  | 0.000854568 |
| SMU.1431c | NC_004350.2:1363390-1365303 | protein_coding | 1.089595065  | 6.35368E-17 |
| SMU.1432c | NC_004350.2:1365385-1366494 | protein_coding | 2.009007569  | 1.15184E-45 |
| SMU.1434c | NC_004350.2:1366506-1367816 | protein_coding | 2.131641768  | 3.56766E-45 |
| SMU.1436c | NC_004350.2:1367963-1368751 | protein_coding | 2.564495261  | 1.07584E-47 |
| SMU.1437  | NC_004350.2:1368759-1369907 | protein_coding | 2.843415957  | 2.83571E-63 |
| SMU.1438c | NC_004350.2:1370234-1370932 | protein_coding | 2.094652966  | 1.05132E-16 |
| SMU.1442c | NC_004350.2:1371533-1372063 | protein_coding | -0.600660994 | 7.08488E-05 |
| SMU.1443c | NC_004350.2:1372155-1372946 | protein_coding | -0.252975464 | 0.038110075 |
| NA        | NC_004350.2:1373026-1373340 | protein_coding | 0.048381719  | 0.922599346 |
| SMU.1444c | NC_004350.2:1373434-1375098 | protein_coding | 1.140438297  | 6.31316E-21 |
| SMU.1445c | NC_004350.2:1375345-1376103 | protein_coding | 0.336385923  | 0.134223648 |
| SMU.1446c | NC_004350.2:1376100-1376969 | protein_coding | 0.029970981  | 0.908635706 |
| SMU.1447c | NC_004350.2:1377080-1378081 | protein_coding | 0.291537947  | 0.069773602 |
| SMU.1449  | NC_004350.2:1378343-1379992 | protein_coding | -0.39709361  | 0.005655463 |
| SMU.1450  | NC_004350.2:1380297-1381694 | protein_coding | 0.128004297  | 0.365267943 |
| SMU.1451  | NC_004350.2:1381765-1382481 | protein_coding | -0.113416047 | 0.464447654 |
| SMU.1452  | NC_004350.2:1382495-1384174 | protein_coding | 0.214215767  | 0.08974228  |
| SMU.1453c | NC_004350.2:1384307-1385539 | protein_coding | -0.872599601 | 4.62356E-11 |
| SMU.1454c | NC_004350.2:1385529-1386698 | protein_coding | -0.661889572 | 1.8137E-05  |
| SMU.1455  | NC_004350.2:1386767-1387246 | protein_coding | -0.848989837 | 0.000167671 |
| SMU.1457  | NC_004350.2:1387541-1388587 | protein_coding | -0.582594218 | 2.70609E-07 |
| SMU.1460  | NC_004350.2:1389227-1389823 | protein_coding | -0.252183378 | 0.11111428  |
| SMU.1461  | NC_004350.2:1389825-1390694 | protein_coding | -0.628484317 | 6.33517E-08 |
| SMU.1462c | NC_004350.2:1390759-1391862 | protein_coding | -0.612335635 | 2.21375E-05 |
| SMU.1463c | NC_004350.2:1391889-1392677 | protein_coding | -0.313632373 | 0.114101564 |
| SMU.1464c | NC_004350.2:1392667-1393365 | protein_coding | -0.143571792 | 0.537153843 |
| SMU.1465c | NC_004350.2:1393355-1394050 | protein_coding | 0.023062186  | 0.938292359 |
| SMU.1466  | NC_004350.2:1394060-1395004 | protein_coding | -0.202344561 | 0.169529624 |
| SMU.1467  | NC_004350.2:1395108-1395626 | protein_coding | 0.375589734  | 0.061457914 |
| SMU.1470c | NC_004350.2:1396299-1396931 | protein_coding | -0.004070392 | 0.987447985 |
| SMU.1471c | NC_004350.2:1397184-1398083 | protein_coding | -0.091943022 | 0.722522017 |
| SMU.1472  | NC_004350.2:1398203-1400407 | protein_coding | -0.081257706 | 0.501631422 |
| SMU.1473c | NC_004350.2:1400404-1401168 | protein_coding | 0.238784334  | 0.087659483 |
| SMU.1474c | NC_004350.2:1401165-1402094 | protein_coding | 0.985609571  | 4.39796E-08 |
| SMU.1475c | NC_004350.2:1402122-1402757 | protein_coding | 1.187304771  | 2.51572E-17 |
| SMU.1476c | NC_004350.2:1402744-1403991 | protein_coding | 0.910479728  | 2.99996E-12 |
| SMU.1477  | NC_004350.2:1404180-1405064 | protein_coding | 1.322994436  | 1.02482E-05 |
| SMU.1479  | NC_004350.2:1405139-1405315 | protein_coding | -0.530434858 | 0.050603852 |
| SMU.1480  | NC_004350.2:1405637-1406278 | protein_coding | 1.481929407  | 2.22856E-09 |
| SMU.1482c | NC_004350.2:1406343-1406969 | protein_coding | -0.256272982 | 0.147050889 |
| SMU.1483c | NC_004350.2:1406966-1407508 | protein_coding | -0.140641481 | 0.576132096 |
| SMU.1484c | NC_004350.2:1407505-1408824 | protein_coding | -0.164603799 | 0.27889517  |
| SMU.1485c | NC_004350.2:1408811-1410511 | protein_coding | 0.0090647    | 0.957945292 |
| SMU.1486c | NC_004350.2:1410521-1411255 | protein_coding | 1.036543949  | 2.34761E-05 |
| SMU.1487  | NC_004350.2:1411476-1412621 | protein_coding | 0.128070465  | 0.600519188 |
| SMU.1488c | NC_004350.2:1412816-1413085 | protein_coding | 4.489426504  | 1.39595E-91 |
| SMU.1489  | NC_004350.2:1413105-1414001 | protein_coding | 4.895241728  | 2.9845E-164 |
| SMU.1490  | NC_004350.2:1414248-1415654 | protein_coding | 4.05065388   | 1.52181E-48 |
| SMU.1491  | NC_004350.2:1415666-1417372 | protein_coding | 4.075159753  | 9.2155E-46  |
| SMU.1492  | NC_004350.2:1417379-1417693 | protein_coding | 3.916237913  | 3.62463E-95 |
| SMU.1493  | NC_004350.2:1417709-1418686 | protein_coding | 3.952911267  | 4.4196E-131 |
| SMU.1494  | NC_004350.2:1418691-1419623 | protein_coding | 4.116899737  | 1.34693E-43 |
| SMU.1495  | NC_004350.2:1419642-1420157 | protein_coding | 3.875733217  | 1.0145E-124 |
| SMU.1496  | NC_004350.2:1420183-1420611 | protein_coding | 3.374526321  | 7.05725E-52 |
| SMU.1498  | NC_004350.2:1420918-1421673 | protein_coding | 0.701370687  | 0.00039905  |
| SMU.1499  | NC_004350.2:1421898-1425536 | protein_coding | -0.649354363 | 4.97602E-09 |
| SMU.1500  | NC_004350.2:1425526-1428768 | protein_coding | -0.24753896  | 0.037993225 |
| SMU.1502c | NC_004350.2:1429640-1429885 | protein_coding | 0.041426006  | 0.957855277 |

|           |                             |                |              |             |
|-----------|-----------------------------|----------------|--------------|-------------|
| SMU.1504c | NC_004350.2:1430060-1430386 | protein_coding | 0.803115799  | 0.150897824 |
| SMU.1505c | NC_004350.2:1430750-1430920 | pseudogene     | -0.077560396 | 0.921628598 |
| SMU.1506c | NC_004350.2:1431235-1432515 | protein_coding | -0.562775091 | 0.076013393 |
| SMU.1507c | NC_004350.2:1432512-1432835 | protein_coding | -0.853466888 | 0.054932145 |
| SMU.1508c | NC_004350.2:1432832-1433947 | protein_coding | -0.97773328  | 0.000334449 |
| SMU.1509  | NC_004350.2:1434153-1435010 | protein_coding | -2.063694655 | 3.97765E-36 |
| SMU.1510  | NC_004350.2:1435221-1437626 | protein_coding | -0.097551115 | 0.511622112 |
| SMU.1511c | NC_004350.2:1437640-1438161 | protein_coding | 0.099215706  | 0.683959756 |
| SMU.1512  | NC_004350.2:1438234-1439277 | protein_coding | 0.104843417  | 0.670028918 |
| SMU.1513  | NC_004350.2:1439718-1443254 | protein_coding | -0.481231231 | 2.26037E-06 |
| SMU.1514  | NC_004350.2:1443254-1443949 | protein_coding | 0.166412604  | 0.420753817 |
| SMU.1515  | NC_004350.2:1444056-1444859 | protein_coding | 2.218813982  | 4.14787E-84 |
| SMU.1516  | NC_004350.2:1444856-1446208 | protein_coding | 2.007134685  | 1.62228E-69 |
| SMU.1517  | NC_004350.2:1446201-1446908 | protein_coding | 2.129174712  | 1.4149E-37  |
| SMU.1519  | NC_004350.2:1447261-1448043 | protein_coding | 2.252693619  | 1.39198E-76 |
| SMU.1520  | NC_004350.2:1448040-1448852 | protein_coding | 1.777182795  | 9.24041E-37 |
| SMU.1521  | NC_004350.2:1448870-1449574 | protein_coding | 1.470471373  | 6.36816E-18 |
| SMU.1522  | NC_004350.2:1449589-1450239 | protein_coding | 0.676524472  | 8.58015E-06 |
| SMU.1523  | NC_004350.2:1450307-1451188 | protein_coding | -0.033946389 | 0.843439241 |
| SMU.1524c | NC_004350.2:1451230-1451418 | protein_coding | -0.029663663 | 0.957855277 |
| SMU.1525  | NC_004350.2:1451421-1452692 | protein_coding | 0.226333699  | 0.11072408  |
| SMU.1526c | NC_004350.2:1452758-1452967 | protein_coding | -1.176116988 | 0.004049089 |
| SMU.1527  | NC_004350.2:1453264-1453680 | protein_coding | -2.005808351 | 3.67223E-98 |
| SMU.1528  | NC_004350.2:1453694-1455100 | protein_coding | -2.55512402  | 2.2637E-161 |
| SMU.1529  | NC_004350.2:1455126-1456004 | protein_coding | -2.764578608 | 1.8826E-161 |
| SMU.1530  | NC_004350.2:1456023-1457528 | protein_coding | -2.4079909   | 1.9558E-183 |
| SMU.1531  | NC_004350.2:1457544-1458080 | protein_coding | -2.544036708 | 5.6495E-81  |
| SMU.1532  | NC_004350.2:1458080-1458577 | protein_coding | -2.311766322 | 7.51151E-70 |
| SMU.1533  | NC_004350.2:1458595-1459314 | protein_coding | -2.43494966  | 1.4398E-99  |
| SMU.1534  | NC_004350.2:1459344-1459547 | protein_coding | -2.625890758 | 2.35244E-57 |
| SMU.1535  | NC_004350.2:1459786-1462182 | protein_coding | -1.579719616 | 1.54786E-59 |
| SMU.1536  | NC_004350.2:1462213-1463643 | protein_coding | -1.821742559 | 1.33847E-76 |
| SMU.1537  | NC_004350.2:1463640-1464773 | protein_coding | -1.846065558 | 4.48145E-76 |
| SMU.1538  | NC_004350.2:1464763-1465902 | protein_coding | -2.024646168 | 2.9944E-103 |
| SMU.1539  | NC_004350.2:1465928-1467814 | protein_coding | -1.927240468 | 3.73711E-69 |
| SMU.1541  | NC_004350.2:1468031-1470346 | protein_coding | -0.791156769 | 1.41871E-17 |
| SMU.1542c | NC_004350.2:1470361-1471404 | protein_coding | -0.485533999 | 1.23423E-05 |
| SMU.1543  | NC_004350.2:1471417-1473375 | protein_coding | -0.236708434 | 0.013710493 |
| SMU.1545c | NC_004350.2:1473585-1474097 | protein_coding | 1.507934514  | 1.15954E-08 |
| SMU.1546  | NC_004350.2:1474220-1474678 | protein_coding | -0.661520508 | 0.031754055 |
| SMU.1547c | NC_004350.2:1474761-1475357 | protein_coding | -0.092337658 | 0.817431717 |
| SMU.1548c | NC_004350.2:1475354-1476460 | protein_coding | 0.268238839  | 0.171695835 |
| SMU.1550c | NC_004350.2:1476453-1477190 | protein_coding | -0.002976671 | 0.996820397 |
| SMU.1551c | NC_004350.2:1477187-1478068 | protein_coding | 0.634271965  | 0.077380724 |
| SMU.1552c | NC_004350.2:1478105-1478470 | protein_coding | 1.298311387  | 0.075657258 |
| SMU.1553c | NC_004350.2:1478460-1478654 | protein_coding | 2.65385569   | 0.018870296 |
| SMU.1554c | NC_004350.2:1478663-1478860 | protein_coding | 2.316994793  | 0.002250737 |
| SMU.1555c | NC_004350.2:1479016-1479948 | protein_coding | -0.086897876 | 0.492239438 |
| SMU.1556  | NC_004350.2:1479960-1480820 | protein_coding | 0.018299317  | 0.884161823 |
| SMU.1557c | NC_004350.2:1480838-1482121 | protein_coding | 0.115021022  | 0.320200076 |
| SMU.1558c | NC_004350.2:1482114-1482668 | protein_coding | 0.589304352  | 0.001445068 |
| SMU.1560  | NC_004350.2:1483157-1483570 | protein_coding | 0.665786155  | 0.139377008 |
| SMU.1561  | NC_004350.2:1483658-1484317 | protein_coding | -1.991887645 | 2.99884E-48 |
| SMU.1562  | NC_004350.2:1484331-1484984 | protein_coding | -2.080417429 | 4.9752E-59  |
| SMU.1563  | NC_004350.2:1485021-1487813 | protein_coding | -1.877347386 | 1.1804E-102 |
| SMU.1564  | NC_004350.2:1488085-1490361 | protein_coding | -2.212468918 | 8.6835E-133 |
| SMU.1565  | NC_004350.2:1490333-1491862 | protein_coding | -1.728685947 | 2.53492E-54 |
| SMU.1566  | NC_004350.2:1491977-1492996 | protein_coding | 0.6372789    | 0.000706484 |
| SMU.1568  | NC_004350.2:1493243-1494490 | protein_coding | -3.53901569  | 1.1083E-277 |

|           |                             |                |              |             |
|-----------|-----------------------------|----------------|--------------|-------------|
| SMU.1569  | NC_004350.2:1494567-1495928 | protein_coding | -2.253901396 | 2.69167E-74 |
| SMU.1570  | NC_004350.2:1495928-1496764 | protein_coding | -2.214707053 | 5.25045E-84 |
| SMU.1571  | NC_004350.2:1496789-1497922 | protein_coding | -1.888529149 | 4.4473E-73  |
| SMU.1572  | NC_004350.2:1498053-1499312 | protein_coding | 1.627128661  | 3.52354E-37 |
| SMU.1573  | NC_004350.2:1499456-1500649 | protein_coding | 0.848731144  | 9.07399E-07 |
| SMU.1574c | NC_004350.2:1501433-1502632 | protein_coding | -1.514619259 | 1.72167E-29 |
| SMU.1575c | NC_004350.2:1502821-1503105 | protein_coding | -2.350439718 | 8.22535E-19 |
| SMU.1576c | NC_004350.2:1503086-1505134 | protein_coding | -1.640091124 | 5.66433E-20 |
| SMU.1577c | NC_004350.2:1505191-1508940 | protein_coding | -1.204791788 | 4.09364E-18 |
| SMU.1578  | NC_004350.2:1509217-1510152 | protein_coding | -1.007636452 | 1.25969E-11 |
| NA        | NC_004350.2:1510133-1510327 | protein_coding | 0.259739427  | 0.255503586 |
| SMU.1581  | NC_004350.2:1510427-1512103 | protein_coding | -0.447971004 | 2.78154E-06 |
| SMU.1582c | NC_004350.2:1512103-1512600 | protein_coding | -0.474919829 | 0.075408456 |
| SMU.1584c | NC_004350.2:1512917-1514686 | protein_coding | -0.779628012 | 0.003415549 |
| SMU.1585c | NC_004350.2:1514805-1515329 | protein_coding | -0.293200795 | 0.411054504 |
| SMU.1586  | NC_004350.2:1515633-1517582 | protein_coding | -0.896035584 | 8.21484E-19 |
| SMU.1587c | NC_004350.2:1517579-1518217 | protein_coding | -0.068859637 | 0.798325419 |
| SMU.1588c | NC_004350.2:1518482-1519816 | protein_coding | 0.319599365  | 0.010137077 |
| SMU.1589c | NC_004350.2:1519818-1520816 | protein_coding | 0.236907791  | 0.037999991 |
| SMU.1590  | NC_004350.2:1520936-1522396 | protein_coding | 0.674062298  | 4.74183E-09 |
| SMU.1591  | NC_004350.2:1522544-1523545 | protein_coding | -1.240348964 | 4.84877E-47 |
| SMU.1592  | NC_004350.2:1523708-1524787 | protein_coding | -0.851505318 | 9.32684E-08 |
| SMU.1593c | NC_004350.2:1524878-1525459 | protein_coding | -0.250411428 | 0.157239989 |
| SMU.1595  | NC_004350.2:1525586-1526356 | protein_coding | -0.019301375 | 0.944233317 |
| SMU.1596  | NC_004350.2:1526622-1527980 | protein_coding | -1.384544404 | 8.47621E-25 |
| SMU.1597c | NC_004350.2:1527996-1528514 | protein_coding | -1.566169694 | 2.8265E-08  |
| SMU.1598  | NC_004350.2:1528534-1528845 | protein_coding | -1.045413367 | 0.019816448 |
| SMU.1599  | NC_004350.2:1528845-1530836 | protein_coding | -1.923185794 | 1.59285E-28 |
| SMU.1600  | NC_004350.2:1530881-1531198 | protein_coding | -1.202457966 | 0.004435235 |
| SMU.1601  | NC_004350.2:1531430-1532863 | protein_coding | -1.405551128 | 1.86915E-18 |
| NA        | NC_004350.2:1532868-1533101 | pseudogene     | 0.628171687  | 0.819089501 |
| SMU.1602  | NC_004350.2:1533196-1533861 | protein_coding | -1.255340204 | 1.79689E-23 |
| SMU.1603  | NC_004350.2:1533897-1534289 | protein_coding | -1.351171802 | 7.81301E-31 |
| SMU.1604c | NC_004350.2:1534623-1535135 | protein_coding | 0.648768388  | 0.228626306 |
| SMU.1605  | NC_004350.2:1535259-1536944 | protein_coding | 0.719884619  | 0.018047066 |
| SMU.1606  | NC_004350.2:1536975-1537442 | protein_coding | 0.60197974   | 0.003520331 |
| SMU.1607  | NC_004350.2:1537405-1539741 | protein_coding | 0.775230058  | 1.84789E-08 |
| SMU.1609c | NC_004350.2:1540088-1540324 | protein_coding | -0.648718214 | 0.003326005 |
| SMU.1610  | NC_004350.2:1540373-1540519 | protein_coding | -0.666275595 | 0.210190873 |
| SMU.1611c | NC_004350.2:1540519-1541688 | protein_coding | -0.705033299 | 2.81574E-08 |
| SMU.1612c | NC_004350.2:1541810-1542646 | protein_coding | -0.887418884 | 9.07659E-18 |
| SMU.1613c | NC_004350.2:1542639-1543235 | protein_coding | -0.926629524 | 9.22288E-11 |
| SMU.1614  | NC_004350.2:1543232-1544053 | protein_coding | -0.985988928 | 1.23267E-16 |
| SMU.1615c | NC_004350.2:1544104-1544628 | protein_coding | -0.345025382 | 0.027086136 |
| SMU.1616c | NC_004350.2:1544728-1545198 | protein_coding | -0.359121711 | 0.076251941 |
| SMU.1617  | NC_004350.2:1545243-1546142 | protein_coding | -0.350488686 | 0.033893626 |
| SMU.1618  | NC_004350.2:1546163-1546570 | protein_coding | -0.175191988 | 0.606586834 |
| SMU.1619c | NC_004350.2:1546554-1547048 | protein_coding | -0.495882454 | 0.013798624 |
| SMU.1620  | NC_004350.2:1547452-1548417 | protein_coding | 0.476981444  | 0.001783563 |
| SMU.1621c | NC_004350.2:1548484-1548699 | protein_coding | 2.245064959  | 0.006897248 |
| SMU.1622  | NC_004350.2:1548696-1549205 | protein_coding | 1.116707262  | 4.5564E-06  |
| SMU.1623c | NC_004350.2:1549274-1550134 | protein_coding | 1.05605447   | 3.87608E-20 |
| SMU.1624  | NC_004350.2:1550379-1550936 | protein_coding | 0.66767476   | 5.652E-07   |
| SMU.1625  | NC_004350.2:1551287-1552024 | protein_coding | 0.506366488  | 6.0631E-05  |
| SMU.1626  | NC_004350.2:1552198-1552887 | protein_coding | 0.549747266  | 1.71487E-07 |
| SMU.1627  | NC_004350.2:1552985-1553410 | protein_coding | 0.74232479   | 6.11911E-11 |
| SMU.1628  | NC_004350.2:1553598-1553951 | protein_coding | -1.313560329 | 0.00504607  |
| SMU.1629c | NC_004350.2:1554073-1556436 | protein_coding | 1.008173488  | 1.76691E-19 |
| SMU.1631  | NC_004350.2:1556533-1557309 | protein_coding | -0.3652838   | 0.179378817 |

|           |                             |                |              |             |
|-----------|-----------------------------|----------------|--------------|-------------|
| SMU.1632  | NC_004350.2:1557370-1558065 | protein_coding | 0.859903662  | 7.29115E-11 |
| SMU.1633c | NC_004350.2:1558076-1558399 | protein_coding | 1.390258494  | 4.5014E-12  |
| SMU.1634c | NC_004350.2:1558411-1558962 | protein_coding | 1.27646294   | 7.65072E-22 |
| SMU.1635  | NC_004350.2:1558972-1560351 | protein_coding | 0.811987672  | 2.38296E-12 |
| SMU.1636c | NC_004350.2:1560390-1560863 | protein_coding | 0.837066348  | 2.63747E-06 |
| SMU.1637c | NC_004350.2:1561076-1561282 | protein_coding | 0.562794987  | 0.000210052 |
| SMU.1639  | NC_004350.2:1561622-1563631 | protein_coding | 1.144784689  | 2.82788E-26 |
| SMU.1641c | NC_004350.2:1564209-1564409 | protein_coding | 0.910846959  | 9.68084E-05 |
| SMU.1642c | NC_004350.2:1564482-1565114 | protein_coding | 0.50965433   | 0.015218281 |
| SMU.1643c | NC_004350.2:1565111-1565564 | pseudogene     | 1.165383847  | 0.00124816  |
| SMU.1644c | NC_004350.2:1565939-1566742 | protein_coding | -0.348690676 | 0.017851789 |
| SMU.1645  | NC_004350.2:1566884-1567765 | protein_coding | 1.498358366  | 1.07674E-25 |
| SMU.1646c | NC_004350.2:1567891-1568529 | protein_coding | -0.659802824 | 0.001748579 |
| SMU.1647c | NC_004350.2:1568519-1568797 | protein_coding | -1.287286162 | 4.61298E-10 |
| SMU.1648c | NC_004350.2:1568916-1569161 | protein_coding | 0.294886083  | 0.738822022 |
| SMU.1649  | NC_004350.2:1569394-1570221 | protein_coding | 2.702465842  | 2.6309E-111 |
| SMU.1650  | NC_004350.2:1570286-1570909 | protein_coding | -0.101891639 | 0.813683272 |
| SMU.1651  | NC_004350.2:1570974-1571327 | protein_coding | -1.775518477 | 3.22973E-26 |
| SMU.1652  | NC_004350.2:1571364-1571858 | protein_coding | -2.023154207 | 1.11539E-29 |
| SMU.1653  | NC_004350.2:1571947-1573128 | protein_coding | -1.615305496 | 1.99361E-57 |
| SMU.1654c | NC_004350.2:1573214-1573768 | protein_coding | -1.320628733 | 1.70886E-23 |
| SMU.1656  | NC_004350.2:1574177-1575268 | protein_coding | -1.532628632 | 5.01751E-34 |
| SMU.1657c | NC_004350.2:1575488-1575829 | protein_coding | 2.03196616   | 9.71918E-07 |
| SMU.1658  | NC_004350.2:1575845-1577080 | protein_coding | 1.9604964    | 3.36149E-10 |
| SMU.1659c | NC_004350.2:1577385-1578251 | protein_coding | -0.697516302 | 4.35096E-05 |
| SMU.1660c | NC_004350.2:1578257-1578589 | protein_coding | -0.753213387 | 0.002935991 |
| SMU.1661c | NC_004350.2:1578582-1579388 | protein_coding | -0.639320064 | 0.000389394 |
| SMU.1662  | NC_004350.2:1579385-1580260 | protein_coding | -0.696788664 | 0.000117699 |
| SMU.1663  | NC_004350.2:1580273-1580911 | protein_coding | -0.95383788  | 8.64861E-06 |
| SMU.1664c | NC_004350.2:1580988-1581647 | protein_coding | 0.340458911  | 0.046679721 |
| SMU.1665  | NC_004350.2:1581763-1582473 | protein_coding | 0.165080892  | 0.196036492 |
| SMU.1666  | NC_004350.2:1582473-1583237 | protein_coding | 0.123510041  | 0.290589137 |
| SMU.1667  | NC_004350.2:1583237-1584193 | protein_coding | 0.560194472  | 1.14071E-05 |
| SMU.1668  | NC_004350.2:1584197-1585066 | protein_coding | 0.520332467  | 0.000423712 |
| SMU.1669  | NC_004350.2:1585150-1586322 | protein_coding | 0.417443303  | 1.25249E-05 |
| SMU.1670c | NC_004350.2:1586425-1586673 | protein_coding | 1.260744574  | 6.42842E-09 |
| SMU.1671c | NC_004350.2:1586680-1587120 | protein_coding | 1.213508115  | 3.5718E-09  |
| SMU.1672  | NC_004350.2:1587236-1587826 | protein_coding | 0.24364779   | 0.033949038 |
| SMU.1673  | NC_004350.2:1588358-1588987 | protein_coding | -1.351024381 | 2.71125E-21 |
| SMU.1674  | NC_004350.2:1589300-1590463 | protein_coding | -0.304010956 | 0.144102914 |
| SMU.1675  | NC_004350.2:1590478-1591572 | protein_coding | 0.173039853  | 0.421236928 |
| SMU.1676c | NC_004350.2:1591799-1593433 | protein_coding | -0.646465512 | 9.08716E-08 |
| SMU.1677  | NC_004350.2:1593522-1594973 | protein_coding | -1.782622109 | 1.159E-27   |
| SMU.1678  | NC_004350.2:1595207-1596226 | protein_coding | -0.752495002 | 3.21372E-07 |
| SMU.1679c | NC_004350.2:1596404-1596913 | protein_coding | -1.251253847 | 1.02809E-26 |
| SMU.1680c | NC_004350.2:1596939-1597556 | protein_coding | -1.512093142 | 4.13435E-43 |
| SMU.1681c | NC_004350.2:1597560-1597934 | protein_coding | -1.561034628 | 2.87638E-23 |
| SMU.1682c | NC_004350.2:1597995-1598570 | protein_coding | 0.83910828   | 0.162907165 |
| SMU.1683c | NC_004350.2:1598634-1599557 | protein_coding | -0.616351223 | 0.003130463 |
| SMU.1685c | NC_004350.2:1599615-1600265 | protein_coding | -0.929663657 | 3.3415E-06  |
| SMU.1687  | NC_004350.2:1600472-1601404 | protein_coding | -0.726670258 | 2.3593E-11  |
| SMU.1688  | NC_004350.2:1601466-1602731 | protein_coding | -0.322517642 | 0.00411588  |
| SMU.1689  | NC_004350.2:1602724-1602963 | protein_coding | -0.100499633 | 0.586720464 |
| SMU.1690  | NC_004350.2:1602978-1604240 | protein_coding | -0.334545639 | 0.013766242 |
| SMU.1691  | NC_004350.2:1604237-1605787 | protein_coding | 0.324417281  | 0.007489737 |
| NA        | NC_004350.2:1605797-1605928 | protein_coding | 0.016552979  | 0.960795008 |
| SMU.1692  | NC_004350.2:1606605-1607396 | protein_coding | -0.881639992 | 4.25319E-10 |
| SMU.1693  | NC_004350.2:1607471-1608808 | protein_coding | 1.452610862  | 3.43668E-26 |
| SMU.1694c | NC_004350.2:1608844-1609938 | protein_coding | -0.158215418 | 0.449016401 |

|           |                             |                |              |             |
|-----------|-----------------------------|----------------|--------------|-------------|
| SMU.1695  | NC_004350.2:1610015-1610797 | protein_coding | -0.089530069 | 0.582770925 |
| SMU.1697c | NC_004350.2:1610931-1611476 | protein_coding | 0.068410536  | 0.786093103 |
| SMU.1699c | NC_004350.2:1611473-1612405 | protein_coding | 0.54513124   | 0.001912726 |
| SMU.1700c | NC_004350.2:1612510-1613205 | protein_coding | 0.545475964  | 0.014044961 |
| SMU.1701c | NC_004350.2:1613202-1613564 | protein_coding | 0.603028401  | 0.144102914 |
| SMU.1702c | NC_004350.2:1613730-1614380 | protein_coding | 1.386205401  | 1.56818E-14 |
| SMU.1703c | NC_004350.2:1614370-1614942 | protein_coding | 2.005299929  | 2.46545E-22 |
| SMU.1704  | NC_004350.2:1615455-1615781 | protein_coding | 1.274703656  | 3.02286E-05 |
| SMU.1705  | NC_004350.2:1615768-1616364 | protein_coding | 1.334752055  | 4.8756E-09  |
| SMU.1706  | NC_004350.2:1616361-1617188 | protein_coding | 0.92372913   | 3.1352E-08  |
| SMU.1707c | NC_004350.2:1617367-1617915 | protein_coding | 1.226681708  | 0.000654957 |
| SMU.1708  | NC_004350.2:1618381-1619736 | protein_coding | -1.011831679 | 6.75012E-23 |
| SMU.1709  | NC_004350.2:1619743-1621182 | protein_coding | -0.526630873 | 1.99465E-07 |
| SMU.1710c | NC_004350.2:1621249-1621503 | protein_coding | 0.360028058  | 0.186597733 |
| SMU.1711  | NC_004350.2:1621503-1622225 | protein_coding | 0.338874077  | 0.00514905  |
| SMU.1712c | NC_004350.2:1622215-1622811 | protein_coding | 0.164358428  | 0.183199888 |
| SMU.1713c | NC_004350.2:1622808-1623515 | protein_coding | 0.197353186  | 0.105714708 |
| SMU.1714c | NC_004350.2:1623515-1624252 | protein_coding | 0.008504003  | 0.957945292 |
| SMU.1715c | NC_004350.2:1624249-1624710 | protein_coding | 0.285551195  | 0.105491777 |
| SMU.1716c | NC_004350.2:1624707-1625225 | protein_coding | 0.386490536  | 0.005003693 |
| SMU.1717c | NC_004350.2:1625207-1626184 | protein_coding | 0.448408947  | 0.00043999  |
| SMU.1718  | NC_004350.2:1626181-1626975 | protein_coding | 0.032000472  | 0.808615087 |
| SMU.1719c | NC_004350.2:1627028-1627276 | protein_coding | -0.17327281  | 0.323368127 |
| SMU.1721c | NC_004350.2:1627649-1628899 | protein_coding | 0.24526079   | 0.07638417  |
| SMU.1722c | NC_004350.2:1629088-1629777 | protein_coding | -0.618988628 | 1.32471E-06 |
| SMU.1723c | NC_004350.2:1629797-1630300 | protein_coding | -0.327550326 | 0.005538687 |
| SMU.1724c | NC_004350.2:1630335-1631075 | protein_coding | -0.497956834 | 0.04188378  |
| SMU.1725  | NC_004350.2:1631108-1631386 | protein_coding | -2.066854014 | 4.33252E-13 |
| SMU.1727  | NC_004350.2:1631478-1632410 | protein_coding | -0.2595757   | 0.029547502 |
| SMU.1728  | NC_004350.2:1632825-1633307 | protein_coding | 0.091160928  | 0.507290632 |
| SMU.1729c | NC_004350.2:1633443-1635365 | protein_coding | -0.673039694 | 2.39135E-09 |
| SMU.1730c | NC_004350.2:1635461-1635952 | protein_coding | 0.079002838  | 0.766145256 |
| SMU.1731  | NC_004350.2:1636005-1637336 | protein_coding | -1.536695721 | 7.84164E-37 |
| SMU.1732c | NC_004350.2:1637353-1637943 | protein_coding | -1.658840056 | 7.0056E-47  |
| SMU.1733c | NC_004350.2:1638005-1641097 | protein_coding | -0.387452385 | 0.000385076 |
| SMU.1734  | NC_004350.2:1641213-1641983 | protein_coding | -1.301700321 | 1.10098E-16 |
| SMU.1735  | NC_004350.2:1641980-1642846 | protein_coding | -1.448533063 | 1.47413E-47 |
| SMU.1736  | NC_004350.2:1642855-1644225 | protein_coding | -1.459383751 | 3.33827E-56 |
| SMU.1737  | NC_004350.2:1644392-1644814 | protein_coding | -1.466380375 | 2.2308E-36  |
| SMU.1738  | NC_004350.2:1644811-1645299 | protein_coding | -1.389746244 | 3.55024E-24 |
| SMU.1739  | NC_004350.2:1645302-1646534 | protein_coding | -1.430566875 | 1.42665E-49 |
| SMU.1740  | NC_004350.2:1646583-1647317 | protein_coding | -1.357146839 | 5.94315E-32 |
| SMU.1741  | NC_004350.2:1647332-1648252 | protein_coding | -1.244227736 | 1.14239E-32 |
| SMU.1742c | NC_004350.2:1648255-1649220 | protein_coding | -0.724952604 | 1.20195E-10 |
| SMU.1743  | NC_004350.2:1649323-1649547 | protein_coding | -1.026884411 | 0.017177439 |
| SMU.1744  | NC_004350.2:1649607-1650584 | protein_coding | -0.500577265 | 0.00032048  |
| SMU.1745c | NC_004350.2:1650584-1651018 | protein_coding | -0.691289925 | 0.00013888  |
| SMU.1746c | NC_004350.2:1651347-1652138 | protein_coding | -0.199309658 | 0.102424619 |
| SMU.1747c | NC_004350.2:1652300-1652944 | protein_coding | 1.269200724  | 2.96336E-14 |
| SMU.1748  | NC_004350.2:1653043-1654401 | protein_coding | 0.059614836  | 0.723762092 |
| SMU_t41   | NC_004350.2:1654785-1654858 | tRNA           | 2.499350894  | 0.128253796 |
| SMU_t42   | NC_004350.2:1654911-1654984 | tRNA           | 1.993954725  | 0.469502634 |
| SMU_t43   | NC_004350.2:1654998-1655083 | tRNA           | -2.437395417 | 0.001192603 |
| SMU_t44   | NC_004350.2:1655091-1655162 | tRNA           | NA           | NA          |
| SMU_t45   | NC_004350.2:1655165-1655237 | tRNA           | 0.495202664  | 0.922599346 |
| SMU_t46   | NC_004350.2:1655252-1655333 | tRNA           | NA           | NA          |
| SMU_t47   | NC_004350.2:1655343-1655415 | tRNA           | NA           | NA          |
| SMU_t48   | NC_004350.2:1655443-1655515 | tRNA           | NA           | NA          |
| SMU_t49   | NC_004350.2:1655545-1655617 | tRNA           | NA           | NA          |

|           |                             |                |              |             |
|-----------|-----------------------------|----------------|--------------|-------------|
| SMU_r07   | NC_004350.2:1655622-1655737 | rRNA           | NA           | NA          |
| SMU_r08   | NC_004350.2:1655920-1658820 | rRNA           | NA           | NA          |
| SMU_t50   | NC_004350.2:1659077-1659149 | tRNA           | NA           | NA          |
| SMU_r09   | NC_004350.2:1659209-1660765 | rRNA           | -1.428379326 | 0.6965518   |
| SMU.1753c | NC_004350.2:1662432-1662725 | protein_coding | 2.077163644  | 9.03226E-40 |
| NA        | NC_004350.2:1662736-1663759 | pseudogene     | 2.09293047   | 5.09566E-79 |
| SMU.1758c | NC_004350.2:1663756-1664427 | protein_coding | 1.598263843  | 5.13508E-45 |
| SMU.1760c | NC_004350.2:1664429-1665304 | protein_coding | 1.474362238  | 5.1122E-45  |
| SMU.1761c | NC_004350.2:1665308-1666795 | protein_coding | 2.117056055  | 5.28077E-46 |
| SMU.1763c | NC_004350.2:1667240-1667983 | protein_coding | 1.772039172  | 4.0208E-38  |
| SMU.1764c | NC_004350.2:1668084-1670492 | protein_coding | 1.71933178   | 1.36265E-68 |
| SMU.1765c | NC_004350.2:1670737-1671711 | protein_coding | 0.239270363  | 0.169623871 |
| NA        | NC_004350.2:1672007-1672252 | protein_coding | -0.379502881 | 0.005279126 |
| SMU.1768c | NC_004350.2:1672391-1672696 | protein_coding | -0.456286759 | 0.000101908 |
| SMU.1770  | NC_004350.2:1673267-1675918 | protein_coding | -0.46323891  | 5.51061E-08 |
| SMU.1771c | NC_004350.2:1675930-1676238 | protein_coding | -0.459663014 | 0.617208004 |
| SMU.1772c | NC_004350.2:1676210-1676620 | protein_coding | -0.784447325 | 1.83987E-06 |
| SMU.1773c | NC_004350.2:1676613-1677548 | protein_coding | -0.55469211  | 0.003986826 |
| SMU.1774c | NC_004350.2:1677838-1678092 | protein_coding | -0.392712449 | 0.142390595 |
| SMU_t51   | NC_004350.2:1678247-1678317 | tRNA           | 4.19775913   | 3.98453E-06 |
| SMU.1775c | NC_004350.2:1678588-1678767 | protein_coding | 0.015219952  | 0.951979836 |
| SMU.1776c | NC_004350.2:1678998-1679243 | protein_coding | -0.707450082 | 0.000202466 |
| SMU.1777  | NC_004350.2:1679497-1679958 | protein_coding | 0.107882754  | 0.646909268 |
| SMU.1779c | NC_004350.2:1679968-1681347 | protein_coding | 0.191224486  | 0.186040485 |
| SMU.1780  | NC_004350.2:1681383-1682159 | protein_coding | -2.965820911 | 6.17283E-54 |
| SMU.1781  | NC_004350.2:1682245-1682778 | protein_coding | -0.66901881  | 1.20083E-05 |
| SMU.1782  | NC_004350.2:1682838-1683158 | protein_coding | 1.468871627  | 1.33247E-05 |
| SMU_t52   | NC_004350.2:1683397-1683460 | tRNA           | 1.1300617    | 0.438234701 |
| SMU_t53   | NC_004350.2:1683467-1683539 | tRNA           | 0.495205187  | 0.871609965 |
| SMU_t54   | NC_004350.2:1683554-1683635 | tRNA           | NA           | NA          |
| SMU_t55   | NC_004350.2:1683645-1683717 | tRNA           | 0            | 1           |
| SMU_t56   | NC_004350.2:1683745-1683817 | tRNA           | NA           | NA          |
| SMU_t57   | NC_004350.2:1683847-1683919 | tRNA           | NA           | NA          |
| SMU_r10   | NC_004350.2:1683924-1684039 | rRNA           | -0.466589037 | 0.838490514 |
| SMU_r11   | NC_004350.2:1684222-1687122 | rRNA           | 2.288634806  | 0.355372755 |
| SMU_t58   | NC_004350.2:1687379-1687451 | tRNA           | NA           | NA          |
| SMU_r12   | NC_004350.2:1687511-1689067 | rRNA           | 0.429757466  | 0.843509373 |
| SMU.1783  | NC_004350.2:1689405-1691255 | protein_coding | 0.477557531  | 3.96485E-05 |
| SMU.1784c | NC_004350.2:1691282-1692541 | protein_coding | 0.799503299  | 1.0216E-11  |
| SMU.1785  | NC_004350.2:1692557-1693351 | protein_coding | 1.010331574  | 6.45935E-12 |
| SMU.1786  | NC_004350.2:1693366-1694115 | protein_coding | 1.361324994  | 9.11486E-15 |
| SMU.1787c | NC_004350.2:1694227-1694610 | protein_coding | 0.475361549  | 0.042823784 |
| SMU.1788c | NC_004350.2:1694785-1695132 | protein_coding | 1.04724684   | 6.1444E-10  |
| SMU.1789c | NC_004350.2:1695325-1696041 | protein_coding | 0.998801651  | 2.53473E-14 |
| SMU.1790c | NC_004350.2:1696187-1696903 | protein_coding | 2.20012372   | 1.85092E-51 |
| SMU.1791c | NC_004350.2:1697007-1698107 | protein_coding | 2.181119949  | 1.02455E-41 |
| SMU.1794c | NC_004350.2:1698501-1698731 | protein_coding | 2.093584327  | 1.97151E-15 |
| SMU.1795c | NC_004350.2:1698792-1699535 | protein_coding | 2.334988441  | 1.6761E-54  |
| SMU.1797c | NC_004350.2:1699809-1700162 | protein_coding | 1.882150097  | 2.34763E-13 |
| SMU.1798c | NC_004350.2:1700163-1700756 | protein_coding | 1.15168176   | 1.72925E-21 |
| SMU.1799  | NC_004350.2:1700753-1701385 | protein_coding | 1.283465811  | 3.62492E-28 |
| SMU.1800c | NC_004350.2:1701412-1701720 | protein_coding | 1.66064225   | 5.24842E-17 |
| SMU.1801c | NC_004350.2:1701777-1702883 | protein_coding | 1.390640902  | 2.54708E-38 |
| SMU.1802c | NC_004350.2:1702884-1703411 | protein_coding | 1.448560748  | 1.26094E-19 |
| SMU.1803c | NC_004350.2:1703516-1704133 | protein_coding | -0.663940224 | 1.15447E-07 |
| SMU.1805  | NC_004350.2:1704488-1705138 | protein_coding | -0.329037927 | 0.418782429 |
| SMU.1806  | NC_004350.2:1705116-1706285 | protein_coding | -0.126309265 | 0.598115271 |
| SMU.1807c | NC_004350.2:1706316-1707224 | protein_coding | 0.531733668  | 0.005204216 |
| SMU.1808c | NC_004350.2:1707319-1707414 | protein_coding | 0.402726973  | 0.452148789 |

|           |                             |                |              |             |
|-----------|-----------------------------|----------------|--------------|-------------|
| SMU.1809  | NC_004350.2:1707788-1708519 | protein_coding | 0.341310538  | 0.115718245 |
| SMU.1810  | NC_004350.2:1708519-1709271 | protein_coding | 0.249658823  | 0.456574583 |
| SMU.1811  | NC_004350.2:1709273-1710181 | protein_coding | 0.967168451  | 0.000338653 |
| SMU.1812  | NC_004350.2:1710468-1711718 | protein_coding | 1.671161065  | 0.014952338 |
| SMU.1814  | NC_004350.2:1712304-1713683 | protein_coding | 0.975662996  | 4.23765E-16 |
| SMU.1815  | NC_004350.2:1713701-1714399 | protein_coding | 0.793055014  | 2.46395E-09 |
| NA        | NC_004350.2:1714504-1715457 | pseudogene     | 1.262096574  | 3.98453E-05 |
| SMU.1818c | NC_004350.2:1715576-1715749 | protein_coding | -0.681756915 | 0.096181149 |
| SMU.1819  | NC_004350.2:1716002-1717441 | protein_coding | -0.781052882 | 1.2488E-14  |
| SMU.1820c | NC_004350.2:1717441-1718907 | protein_coding | -0.881972723 | 6.31501E-18 |
| SMU.1821c | NC_004350.2:1718907-1719209 | protein_coding | -0.547218844 | 0.008576714 |
| SMU.1822  | NC_004350.2:1719336-1721087 | protein_coding | -0.761458974 | 1.58858E-09 |
| SMU.1823  | NC_004350.2:1721345-1721896 | protein_coding | 0.072718825  | 0.660666533 |
| SMU.1824c | NC_004350.2:1721898-1722683 | protein_coding | -0.117961145 | 0.383799136 |
| SMU.1826  | NC_004350.2:1722792-1724006 | protein_coding | -1.04634568  | 1.4068E-21  |
| SMU.1827  | NC_004350.2:1724183-1724719 | protein_coding | 5.207475857  | 1.48107E-24 |
| SMU.1828  | NC_004350.2:1724817-1725266 | protein_coding | -0.761239959 | 2.34603E-09 |
| SMU.1830c | NC_004350.2:1725544-1726944 | protein_coding | 0.641514071  | 1.52426E-08 |
| SMU.1831  | NC_004350.2:1727002-1727961 | protein_coding | -0.025216901 | 0.894757061 |
| SMU.1833  | NC_004350.2:1728295-1730310 | protein_coding | 0.724340743  | 4.61594E-09 |
| SMU.1834  | NC_004350.2:1730483-1731598 | protein_coding | 0.006431353  | 0.960795008 |
| SMU.1835  | NC_004350.2:1731595-1731954 | protein_coding | -0.082416255 | 0.535973865 |
| SMU.1836  | NC_004350.2:1732224-1733258 | protein_coding | -0.251939706 | 0.009933808 |
| SMU.1837  | NC_004350.2:1733260-1734291 | protein_coding | 0.042706093  | 0.842601979 |
| SMU.1838  | NC_004350.2:1734311-1736830 | protein_coding | 0.344599859  | 3.27976E-05 |
| SMU.1839  | NC_004350.2:1737008-1737958 | protein_coding | -0.009043576 | 0.931014955 |
| SMU.1840  | NC_004350.2:1738127-1739008 | protein_coding | 0.281134365  | 0.004987047 |
| SMU.1841  | NC_004350.2:1739208-1741202 | protein_coding | -1.334982419 | 1.96873E-37 |
| SMU.1843  | NC_004350.2:1741398-1742837 | protein_coding | -2.109913036 | 2.70536E-59 |
| SMU.1844  | NC_004350.2:1742840-1743802 | protein_coding | -1.748071936 | 9.72102E-46 |
| SMU.1845  | NC_004350.2:1743996-1744424 | protein_coding | 0.671255034  | 0.000307208 |
| SMU.1846c | NC_004350.2:1744417-1744806 | protein_coding | 0.548083757  | 5.07549E-05 |
| SMU.1847  | NC_004350.2:1744849-1745409 | protein_coding | 0.690409109  | 1.07482E-08 |
| SMU.1848  | NC_004350.2:1745549-1746253 | protein_coding | -0.289321846 | 0.158209347 |
| SMU.1849  | NC_004350.2:1746301-1746753 | protein_coding | 1.205138292  | 1.14253E-17 |
| SMU.1850  | NC_004350.2:1746923-1747987 | protein_coding | 0.42363803   | 0.000698729 |
| SMU.1851  | NC_004350.2:1747977-1750808 | protein_coding | 1.090902877  | 1.7897E-25  |
| NA        | NC_004350.2:1750858-1751079 | protein_coding | -0.027562993 | 0.963547068 |
| SMU.1852  | NC_004350.2:1751479-1752423 | protein_coding | 0.201627223  | 0.158272886 |
| SMU.1853  | NC_004350.2:1752705-1753367 | protein_coding | 0.015204943  | 0.923450668 |
| SMU.1854  | NC_004350.2:1753506-1753862 | protein_coding | -1.501261088 | 1.67751E-12 |
| SMU.1855  | NC_004350.2:1753859-1754545 | protein_coding | -1.598755342 | 5.2011E-26  |
| SMU.1856c | NC_004350.2:1754553-1755272 | protein_coding | 1.733397358  | 5.39716E-19 |
| SMU.1858  | NC_004350.2:1755591-1755830 | protein_coding | 0.836541374  | 5.08339E-08 |
| SMU.1859  | NC_004350.2:1755859-1756353 | protein_coding | 0.657475995  | 6.2539E-10  |
| SMU.1860  | NC_004350.2:1756371-1756661 | protein_coding | 0.410796524  | 0.005196579 |
| SMU.1861c | NC_004350.2:1756817-1757062 | protein_coding | -0.25449434  | 0.097796952 |
| SMU.1862  | NC_004350.2:1757367-1757570 | protein_coding | -1.775676418 | 8.02102E-06 |
| SMU.1865  | NC_004350.2:1758607-1759752 | protein_coding | 2.002527763  | 3.51516E-37 |
| SMU.1867c | NC_004350.2:1759940-1760989 | protein_coding | 1.429883381  | 5.36509E-28 |
| SMU.1869  | NC_004350.2:1761087-1761401 | protein_coding | 0.91102306   | 2.01836E-07 |
| SMU.1870  | NC_004350.2:1761476-1763806 | protein_coding | 0.899142694  | 4.24734E-14 |
| SMU.1871c | NC_004350.2:1763875-1764420 | protein_coding | 0.370473574  | 0.086677159 |
| SMU.1872c | NC_004350.2:1764417-1764722 | protein_coding | -0.344383218 | 0.113051439 |
| SMU.1873  | NC_004350.2:1764918-1765829 | protein_coding | 0.861063861  | 7.01877E-10 |
| SMU.1874  | NC_004350.2:1765849-1766436 | protein_coding | 0.736039321  | 7.30711E-06 |
| SMU.1875  | NC_004350.2:1766522-1768885 | protein_coding | 0.779380973  | 1.02922E-08 |
| SMU.1876  | NC_004350.2:1768984-1769454 | protein_coding | 0.419411676  | 0.049775388 |
| SMU.1877  | NC_004350.2:1770331-1771323 | protein_coding | -1.128081006 | 1.25662E-23 |

|           |                             |                |              |             |
|-----------|-----------------------------|----------------|--------------|-------------|
| SMU.1878  | NC_004350.2:1771358-1772176 | protein_coding | -0.044242862 | 0.760379724 |
| SMU.1879  | NC_004350.2:1772191-1773117 | protein_coding | -1.243619663 | 6.64354E-39 |
| SMU.1881c | NC_004350.2:1773449-1775740 | protein_coding | 1.952121012  | 1.4068E-21  |
| SMU.1882c | NC_004350.2:1776290-1776643 | protein_coding | 1.53745643   | 5.30414E-06 |
| SMU.1883  | NC_004350.2:1776962-1777330 | protein_coding | 0.470953736  | 0.008041648 |
| SMU.1884c | NC_004350.2:1777567-1778640 | protein_coding | 4.084619348  | 6.80372E-05 |
| SMU.1886  | NC_004350.2:1779164-1780444 | protein_coding | 1.617829948  | 3.95576E-45 |
| SMU.1889c | NC_004350.2:1781127-1781390 | protein_coding | -0.39092124  | 0.390247549 |
| SMU.1892c | NC_004350.2:1781694-1781879 | protein_coding | 0.119300217  | 0.893910586 |
| NA        | NC_004350.2:1781999-1783347 | protein_coding | 1.428683101  | 0.521307877 |
| SMU.1895c | NC_004350.2:1783456-1783617 | protein_coding | 1.059078137  | 7.92091E-09 |
| SMU.1896c | NC_004350.2:1783662-1783916 | protein_coding | 0.330992692  | 0.349080913 |
| SMU.1898  | NC_004350.2:1784304-1786489 | pseudogene     | -1.132448091 | 2.96548E-08 |
| SMU.1900  | NC_004350.2:1786502-1787515 | protein_coding | -2.527116431 | 8.8067E-06  |
| SMU.1904c | NC_004350.2:1788212-1789234 | protein_coding | -4.286674085 | 0           |
| SMU.1905c | NC_004350.2:1789720-1789908 | protein_coding | -4.633404921 | 0           |
| SMU.1906c | NC_004350.2:1790072-1790284 | protein_coding | -4.645164448 | 1.3712E-285 |
| SMU.1909c | NC_004350.2:1791628-1792032 | protein_coding | -4.57258922  | 0           |
| SMU.1910c | NC_004350.2:1792179-1792598 | protein_coding | -4.289814593 | 1.1975E-257 |
| SMU.1913c | NC_004350.2:1793979-1794380 | protein_coding | -4.049477657 | 8.5156E-227 |
| SMU.1914c | NC_004350.2:1794511-1794741 | protein_coding | -2.628147221 | 3.26295E-81 |
| SMU.1915  | NC_004350.2:1795008-1795148 | protein_coding | 2.255006077  | 0.049328469 |
| SMU.1916  | NC_004350.2:1795290-1796615 | protein_coding | -1.463178715 | 2.73973E-29 |
| SMU.1917  | NC_004350.2:1796612-1797364 | protein_coding | -1.753404069 | 7.29289E-41 |
| SMU.1918  | NC_004350.2:1797836-1798474 | protein_coding | 0.309049209  | 0.010945798 |
| SMU.1919  | NC_004350.2:1798521-1799147 | protein_coding | -0.229956719 | 0.04044761  |
| SMU.1920  | NC_004350.2:1799222-1800532 | protein_coding | 0.085784144  | 0.537125962 |
| SMU.1921  | NC_004350.2:1800545-1801444 | protein_coding | 0.217034404  | 0.099612382 |
| SMU.1922  | NC_004350.2:1801445-1802614 | protein_coding | -0.047221918 | 0.683959756 |
| SMU.1923c | NC_004350.2:1802601-1803092 | protein_coding | -0.011886582 | 0.95866659  |
| SMU.1924  | NC_004350.2:1803462-1804154 | protein_coding | -0.892841609 | 9.54808E-11 |
| SMU.1925c | NC_004350.2:1804511-1805047 | protein_coding | 0.636835709  | 0.013551141 |
| SMU.1926  | NC_004350.2:1805040-1805615 | protein_coding | 0.303378409  | 0.149820218 |
| SMU.1927  | NC_004350.2:1805723-1806430 | protein_coding | 0.005529727  | 0.989549132 |
| SMU.1928  | NC_004350.2:1806432-1809044 | protein_coding | -0.482420252 | 0.011543766 |
| SMU.1929  | NC_004350.2:1809181-1810080 | protein_coding | 0.470876856  | 0.000153921 |
| SMU.1930  | NC_004350.2:1810090-1810650 | protein_coding | 0.696092779  | 9.18565E-05 |
| SMU.1931  | NC_004350.2:1810738-1811451 | protein_coding | -0.983260157 | 1.28305E-07 |
| SMU.1933c | NC_004350.2:1811675-1812508 | protein_coding | -0.205294976 | 0.179325288 |
| SMU.1934c | NC_004350.2:1812501-1814177 | protein_coding | -0.912534701 | 9.59844E-15 |
| SMU.1935c | NC_004350.2:1814206-1814751 | protein_coding | -0.583223855 | 0.006760985 |
| SMU.1936c | NC_004350.2:1814761-1815606 | protein_coding | -0.838448729 | 1.89165E-05 |
| SMU.1937  | NC_004350.2:1815730-1816506 | protein_coding | -1.229868773 | 1.24973E-12 |
| SMU.1938c | NC_004350.2:1816574-1817263 | protein_coding | -0.962265946 | 1.39807E-05 |
| SMU.1939c | NC_004350.2:1817265-1818329 | protein_coding | -0.644781949 | 1.02507E-05 |
| SMU.1940c | NC_004350.2:1818322-1819695 | protein_coding | -0.649122435 | 0.000124144 |
| SMU.1941  | NC_004350.2:1819890-1820732 | protein_coding | -0.847826288 | 1.0631E-10  |
| SMU.1942c | NC_004350.2:1820899-1821702 | protein_coding | -0.627967221 | 4.49841E-06 |
| SMU.1943  | NC_004350.2:1822003-1824504 | protein_coding | 0.187055077  | 0.076904846 |
| SMU.1945  | NC_004350.2:1824905-1825669 | protein_coding | 0.001326582  | 0.996017407 |
| SMU.1946  | NC_004350.2:1825662-1826351 | protein_coding | 0.231284512  | 0.251600387 |
| SMU.1947  | NC_004350.2:1826568-1827104 | protein_coding | 1.002854781  | 4.13212E-06 |
| SMU.1948  | NC_004350.2:1827260-1827436 | protein_coding | 1.55964986   | 5.91196E-08 |
| NA        | NC_004350.2:1827448-1827600 | protein_coding | 0.453750835  | 0.05267418  |
| SMU.1949  | NC_004350.2:1827651-1829927 | protein_coding | 0.334943152  | 0.00100048  |
| SMU.1950  | NC_004350.2:1829971-1830837 | protein_coding | 0.21889109   | 0.391137205 |
| SMU.1951c | NC_004350.2:1830857-1832560 | protein_coding | 0.872015678  | 1.12771E-12 |
| SMU.1954  | NC_004350.2:1833204-1834832 | protein_coding | 0.004514057  | 0.960427324 |
| SMU.1955  | NC_004350.2:1834944-1835231 | protein_coding | 0.410993975  | 0.00066588  |



|           |                             |                |              |             |
|-----------|-----------------------------|----------------|--------------|-------------|
| SMU.1956c | NC_004350.2:1835353-1835649 | protein_coding | -4.991212337 | 3.4653E-192 |
| SMU.1957  | NC_004350.2:1835673-1836509 | protein_coding | -4.540281233 | 5.0733E-245 |
| SMU.1958c | NC_004350.2:1836511-1837362 | protein_coding | -4.571908821 | 0           |
| SMU.1960c | NC_004350.2:1837736-1838230 | protein_coding | -4.960594233 | 7.6209E-305 |
| SMU.1961c | NC_004350.2:1838248-1838679 | protein_coding | -4.67946379  | 1.6312E-155 |
| NA        | NC_004350.2:1838712-1838915 | protein_coding | -0.98784427  | 0.246976081 |
| SMU.1963c | NC_004350.2:1838982-1840289 | protein_coding | -1.117196024 | 1.17427E-19 |
| SMU.1964c | NC_004350.2:1840282-1840962 | protein_coding | -0.967307991 | 1.19445E-06 |
| SMU.1965c | NC_004350.2:1840962-1842284 | protein_coding | -1.144600398 | 2.47E-16    |
| SMU.1966c | NC_004350.2:1842284-1843246 | protein_coding | -1.385741589 | 6.028E-14   |
| SMU.1967  | NC_004350.2:1843662-1844057 | protein_coding | -4.741974791 | 1.8826E-161 |
| SMU.1968c | NC_004350.2:1844144-1844500 | protein_coding | 1.303058617  | 0.00429236  |
| SMU.1969c | NC_004350.2:1844500-1844922 | protein_coding | 2.37713513   | 2.85206E-06 |
| SMU.1970c | NC_004350.2:1845020-1845646 | protein_coding | 0.828512853  | 0.001133185 |
| SMU.1971c | NC_004350.2:1845643-1845972 | protein_coding | 0.961491909  | 0.00711556  |
| SMU.1972c | NC_004350.2:1845950-1846258 | protein_coding | 0.919469669  | 0.020723888 |
| SMU.1973  | NC_004350.2:1846318-1847385 | protein_coding | -0.03364644  | 0.84476877  |
| SMU.1974  | NC_004350.2:1847441-1848211 | protein_coding | -0.31175445  | 0.050303026 |
| SMU.1975c | NC_004350.2:1848296-1848958 | protein_coding | -1.425716669 | 1.69024E-30 |
| SMU.1976c | NC_004350.2:1849011-1849451 | protein_coding | -0.738567986 | 8.47879E-09 |
| SMU.1977c | NC_004350.2:1849420-1849665 | protein_coding | -0.820001453 | 5.07549E-05 |
| SMU.1978  | NC_004350.2:1850234-1851433 | protein_coding | -3.443524143 | 7.3482E-133 |
| SMU.1979c | NC_004350.2:1851492-1852445 | protein_coding | -4.335908474 | 1.5685E-165 |
| SMU.1980c | NC_004350.2:1852500-1852889 | protein_coding | -4.424863131 | 3.8588E-128 |
| SMU.1981c | NC_004350.2:1852867-1853301 | protein_coding | -4.526001305 | 4.9731E-136 |
| SMU.1982c | NC_004350.2:1853288-1853581 | protein_coding | -4.378330992 | 3.83874E-55 |
| SMU.1983  | NC_004350.2:1853553-1853984 | protein_coding | -4.792254079 | 6.7715E-186 |
| SMU.1984  | NC_004350.2:1853944-1854258 | protein_coding | -4.641097861 | 2.4393E-177 |
| SMU.1985  | NC_004350.2:1854258-1855235 | protein_coding | -4.321559231 | 3.6171E-140 |
| SMU.1987  | NC_004350.2:1855225-1856166 | protein_coding | -3.935991004 | 7.2736E-120 |
| SMU.1988c | NC_004350.2:1856296-1856679 | protein_coding | 1.343331229  | 3.20033E-07 |
| SMU.1989  | NC_004350.2:1856807-1860463 | protein_coding | -0.004616063 | 0.969429677 |
| SMU.1990  | NC_004350.2:1860672-1864235 | protein_coding | 0.808179109  | 9.74168E-13 |
| SMU.1991  | NC_004350.2:1864496-1866850 | protein_coding | 0.479199176  | 7.53471E-07 |
| SMU.1992  | NC_004350.2:1867018-1868274 | protein_coding | 0.76145005   | 2.69444E-07 |
| SMU.1993  | NC_004350.2:1868430-1869242 | protein_coding | 1.123351624  | 2.65813E-06 |
| SMU.1994  | NC_004350.2:1869232-1869942 | protein_coding | 1.660629194  | 3.14336E-12 |
| SMU.1995c | NC_004350.2:1869945-1870391 | protein_coding | 1.73485081   | 1.34286E-06 |
| SMU.1996  | NC_004350.2:1871026-1871874 | protein_coding | 0.345767976  | 0.06676442  |
| SMU.1997  | NC_004350.2:1872021-1872503 | protein_coding | 1.509869766  | 4.11191E-11 |
| SMU_t59   | NC_004350.2:1873122-1873195 | tRNA           | 5.736593671  | 4.9366E-05  |
| SMU_r13   | NC_004350.2:1873201-1873316 | rRNA           | 0.940873296  | 0.000702914 |
| SMU_r14   | NC_004350.2:1873499-1876399 | rRNA           | -1.42837471  | 0.762676718 |
| SMU_t60   | NC_004350.2:1876656-1876728 | tRNA           | NA           | NA          |
| SMU_r15   | NC_004350.2:1876788-1878344 | rRNA           | NA           | NA          |
| SMU.1999c | NC_004350.2:1878521-1879807 | protein_coding | 1.352449478  | 3.76051E-15 |
| SMU.2000  | NC_004350.2:1880033-1880419 | protein_coding | 0.670816753  | 4.86794E-07 |
| SMU.2001  | NC_004350.2:1880438-1881376 | protein_coding | 0.503033638  | 6.16682E-07 |
| SMU.2002  | NC_004350.2:1881422-1881805 | protein_coding | 0.466930874  | 0.000589129 |
| SMU.2003  | NC_004350.2:1881823-1882188 | protein_coding | 0.419958433  | 0.002221357 |
| SMU.2003a | NC_004350.2:1882208-1882324 | protein_coding | 0.874695523  | 6.36439E-08 |
| SMU.2004  | NC_004350.2:1882350-1882568 | protein_coding | 0.308052311  | 0.041120773 |
| SMU.2005  | NC_004350.2:1882687-1883325 | protein_coding | -1.079828913 | 1.91737E-14 |
| SMU.2006  | NC_004350.2:1883555-1884859 | protein_coding | -0.489451559 | 4.26378E-06 |
| SMU.2007  | NC_004350.2:1884859-1885299 | protein_coding | -1.085533965 | 1.2227E-36  |
| SMU.2008  | NC_004350.2:1885592-1885774 | protein_coding | -0.732601042 | 7.33393E-10 |
| SMU.2009  | NC_004350.2:1885788-1886282 | protein_coding | -0.906342165 | 4.74888E-21 |
| SMU.2010  | NC_004350.2:1886301-1886657 | protein_coding | -1.064090602 | 4.49473E-26 |
| SMU.2011  | NC_004350.2:1886747-1887283 | protein_coding | -0.909450552 | 5.87287E-27 |

|           |                             |                |              |             |
|-----------|-----------------------------|----------------|--------------|-------------|
| SMU.2012  | NC_004350.2:1887696-1888094 | protein_coding | -1.190037069 | 2.15476E-36 |
| SMU.2014  | NC_004350.2:1888351-1888536 | protein_coding | -0.974062993 | 1.24879E-25 |
| SMU.2015  | NC_004350.2:1888551-1889093 | protein_coding | -1.099561487 | 3.67697E-32 |
| SMU.2016  | NC_004350.2:1889117-1889422 | protein_coding | -1.02740646  | 8.30462E-17 |
| SMU.2017  | NC_004350.2:1889588-1889956 | protein_coding | -1.164319735 | 4.69154E-27 |
| SMU.2018  | NC_004350.2:1889983-1890243 | protein_coding | -0.835148614 | 9.30266E-15 |
| SMU.2019  | NC_004350.2:1890264-1890473 | protein_coding | -0.94288239  | 1.32152E-11 |
| SMU.2020  | NC_004350.2:1890483-1890896 | protein_coding | -0.829973083 | 1.27224E-15 |
| SMU.2021  | NC_004350.2:1890900-1891553 | protein_coding | -0.581275782 | 1.01832E-09 |
| SMU.2022  | NC_004350.2:1891566-1891910 | protein_coding | -0.361968363 | 0.000585607 |
| SMU.2023c | NC_004350.2:1891927-1892205 | protein_coding | -0.186354009 | 0.115718245 |
| SMU_2167  | NC_004350.2:1892307-1893146 | protein_coding | -0.29384541  | 0.001851397 |
| SMU_2166  | NC_004350.2:1893164-1893463 | protein_coding | -0.042953937 | 0.744768352 |
| SMU.2024c | NC_004350.2:1893515-1894138 | protein_coding | 0.268108187  | 0.023500114 |
| SMU.2025  | NC_004350.2:1894163-1894789 | protein_coding | 0.71202253   | 3.38227E-16 |
| NA        | NC_004350.2:1895024-1895332 | protein_coding | 1.097897513  | 3.51469E-19 |
| SMU.2027  | NC_004350.2:1895652-1896338 | protein_coding | -1.142295397 | 2.6038E-27  |
| SMU.2028  | NC_004350.2:1896529-1898916 | protein_coding | 1.316472702  | 2.55832E-29 |
| SMU.2029  | NC_004350.2:1899203-1901644 | protein_coding | 0.219544112  | 0.033712411 |
| SMU.2030  | NC_004350.2:1901641-1902105 | protein_coding | 0.522696824  | 0.000527277 |
| SMU.2031  | NC_004350.2:1902386-1903432 | protein_coding | -0.061285904 | 0.619391209 |
| SMU.2032  | NC_004350.2:1903499-1904284 | protein_coding | 0.312469048  | 0.000987535 |
| SMU.2033c | NC_004350.2:1904475-1906328 | protein_coding | 0.758403565  | 3.53792E-08 |
| SMU_t61   | NC_004350.2:1906607-1906677 | tRNA           | 4.398964755  | 0.001181945 |
| SMU.2035  | NC_004350.2:1907122-1908078 | protein_coding | -0.932375683 | 7.16147E-19 |
| SMU.2036  | NC_004350.2:1908223-1910118 | protein_coding | 0.678697862  | 9.87487E-12 |
| SMU.2037  | NC_004350.2:1910627-1912255 | protein_coding | -0.135641898 | 0.374221726 |
| SMU.2038  | NC_004350.2:1912281-1914248 | protein_coding | 0.251534379  | 0.080875894 |
| SMU.2040  | NC_004350.2:1914422-1915135 | protein_coding | 1.061483702  | 4.8745E-07  |
| SMU.2042  | NC_004350.2:1915481-1918033 | protein_coding | 0.861178029  | 9.19593E-21 |
| SMU.2043c | NC_004350.2:1918518-1918964 | protein_coding | 0.638494765  | 0.00056851  |
| SMU.2044  | NC_004350.2:1918971-1921193 | protein_coding | 1.400946887  | 1.65326E-32 |
| SMU.2046c | NC_004350.2:1921341-1922162 | protein_coding | -0.724318308 | 2.30311E-06 |
| SMU.2047  | NC_004350.2:1922253-1924442 | protein_coding | -1.632569285 | 1.29441E-78 |
| NA        | NC_004350.2:1924701-1924895 | pseudogene     | 2.23270658   | 0.022738603 |
| SMU.2049c | NC_004350.2:1925281-1926024 | protein_coding | -0.670499984 | 6.20557E-07 |
| SMU.2050c | NC_004350.2:1926025-1926978 | protein_coding | -0.694039184 | 3.47928E-10 |
| SMU.2052c | NC_004350.2:1927206-1927503 | pseudogene     | -1.066708342 | 4.68045E-07 |
| SMU.2054c | NC_004350.2:1927516-1927986 | protein_coding | -0.667534158 | 0.001851397 |
| SMU.2055  | NC_004350.2:1928134-1928625 | protein_coding | 0.134124818  | 0.521307877 |
| SMU.2056  | NC_004350.2:1928615-1929880 | protein_coding | 0.165250894  | 0.193461545 |
| NA        | NC_004350.2:1929950-1930143 | ncRNA          | -2.885781679 | 1.91595E-69 |
| SMU_t62   | NC_004350.2:1930143-1930215 | tRNA           | 2.702711589  | 0.090115768 |
| SMU.2057c | NC_004350.2:1930287-1932202 | pseudogene     | 0.166452986  | 0.123792056 |
| SMU.2058  | NC_004350.2:1932301-1933095 | protein_coding | 1.116165491  | 2.30488E-08 |
| SMU.2059c | NC_004350.2:1933280-1934305 | protein_coding | 0.563276655  | 0.059687431 |
| SMU.2060  | NC_004350.2:1934410-1935285 | protein_coding | 0.246587761  | 0.044167369 |
| SMU.2061  | NC_004350.2:1935354-1936007 | protein_coding | -0.427756211 | 0.00100048  |
| SMU.2063  | NC_004350.2:1936213-1937172 | protein_coding | -0.230951114 | 0.069773602 |
| SMU.2064c | NC_004350.2:1937248-1940046 | protein_coding | -0.051888678 | 0.712459436 |
| SMU.2065  | NC_004350.2:1940179-1941195 | protein_coding | -0.004368459 | 0.976076093 |
| SMU.2066c | NC_004350.2:1941230-1944154 | protein_coding | 0.140969083  | 0.191297444 |
| SMU.2067  | NC_004350.2:1944151-1945110 | protein_coding | 0.245041955  | 0.104170072 |
| SMU.2069  | NC_004350.2:1945717-1946511 | protein_coding | 0.672747044  | 0.010728473 |
| SMU.2070  | NC_004350.2:1946538-1947266 | protein_coding | 0.071053227  | 0.831524114 |
| SMU.2071  | NC_004350.2:1947352-1947957 | protein_coding | 1.499843595  | 1.7387E-12  |
| SMU.2072c | NC_004350.2:1947917-1948474 | protein_coding | 2.247605983  | 5.91067E-51 |
| SMU.2074  | NC_004350.2:1948736-1950940 | protein_coding | 0.890872301  | 1.23003E-18 |
| SMU.2075c | NC_004350.2:1951039-1952610 | protein_coding | 0.486305347  | 2.97022E-05 |

|           |                             |                |              |             |
|-----------|-----------------------------|----------------|--------------|-------------|
| SMU.2077c | NC_004350.2:1952844-1953143 | protein_coding | 1.270465943  | 8.30498E-13 |
| SMU.2078c | NC_004350.2:1953224-1953643 | protein_coding | 1.123099409  | 3.16056E-21 |
| SMU.2079c | NC_004350.2:1953640-1953909 | protein_coding | 0.730967045  | 1.74688E-05 |
| SMU.2080  | NC_004350.2:1954077-1954511 | protein_coding | 1.097501845  | 0.062670564 |
| SMU.2081  | NC_004350.2:1954524-1954970 | protein_coding | 1.354115781  | 0.004841364 |
| NA        | NC_004350.2:1954961-1955173 | protein_coding | 0.083033877  | 0.51990689  |
| SMU.2083c | NC_004350.2:1955300-1955725 | protein_coding | 0.663640305  | 3.44714E-07 |
| SMU.2084c | NC_004350.2:1955976-1956374 | protein_coding | -0.702667751 | 3.71357E-09 |
| SMU.2085  | NC_004350.2:1956459-1957610 | protein_coding | -1.2017561   | 1.89273E-30 |
| SMU.2086  | NC_004350.2:1957650-1958906 | protein_coding | -2.111202011 | 9.54004E-64 |
| SMU.2087  | NC_004350.2:1959055-1959615 | protein_coding | 0.45149728   | 0.011699147 |
| SMU.2088  | NC_004350.2:1959697-1960290 | protein_coding | 0.620156282  | 6.57704E-05 |
| SMU.2089  | NC_004350.2:1960473-1962428 | protein_coding | 0.924429531  | 1.36042E-10 |
| NA        | NC_004350.2:1962653-1962931 | pseudogene     | 3.738679921  | 7.86958E-08 |
| SMU.2091c | NC_004350.2:1962926-1965475 | protein_coding | 0.421148744  | 0.000253085 |
| SMU.2092c | NC_004350.2:1965468-1965815 | protein_coding | 1.151281766  | 1.66549E-08 |
| SMU.2093  | NC_004350.2:1965812-1966249 | protein_coding | 1.313057421  | 6.35402E-09 |
| SMU.2094c | NC_004350.2:1966672-1967169 | protein_coding | 0.570374368  | 0.041520978 |
| NA        | NC_004350.2:1968106-1968546 | pseudogene     | 0.078615122  | 0.594918872 |
| SMU.2098  | NC_004350.2:1968647-1970338 | protein_coding | 0.251126591  | 0.027293362 |
| SMU.2099c | NC_004350.2:1970386-1971264 | protein_coding | -0.742225202 | 2.26075E-08 |
| SMU.2100c | NC_004350.2:1971295-1972233 | protein_coding | -1.095804768 | 2.90322E-20 |
| SMU.2101  | NC_004350.2:1972220-1973989 | protein_coding | -0.883799552 | 6.88437E-17 |
| SMU.2102  | NC_004350.2:1974220-1975509 | protein_coding | 0.564425855  | 9.20905E-07 |
| SMU.2104  | NC_004350.2:1975802-1977646 | protein_coding | -0.030695293 | 0.840266892 |
| SMU.2104a | NC_004350.2:1977775-1977957 | protein_coding | -0.327534429 | 0.055022912 |
| NA        | NC_004350.2:1977973-1978122 | protein_coding | -0.369934594 | 0.007920112 |
| SMU.2106c | NC_004350.2:1978397-1978654 | protein_coding | -0.585592405 | 0.207222662 |
| SMU.2107c | NC_004350.2:1978676-1978945 | protein_coding | 0.537945379  | 0.294069659 |
| SMU.2108c | NC_004350.2:1978971-1980068 | protein_coding | 0.501399132  | 0.034447724 |
| SMU.2109  | NC_004350.2:1980163-1981524 | protein_coding | 2.463405917  | 2.77501E-31 |
| SMU.2111c | NC_004350.2:1981648-1982040 | protein_coding | -0.419475995 | 0.249907393 |
| SMU.2112  | NC_004350.2:1982239-1983933 | protein_coding | -0.719069055 | 6.65788E-13 |
| SMU.2113c | NC_004350.2:1984090-1984635 | protein_coding | 0.409288038  | 0.158272886 |
| SMU.2114c | NC_004350.2:1984701-1985075 | protein_coding | 0.091727436  | 0.798325419 |
| SMU.2115  | NC_004350.2:1985154-1985909 | protein_coding | 0.937249171  | 0.034848361 |
| SMU.2116  | NC_004350.2:1986361-1987512 | protein_coding | 3.311404205  | 5.9246E-115 |
| SMU.2117  | NC_004350.2:1987509-1988141 | protein_coding | 2.905105646  | 1.44656E-62 |
| SMU.2118  | NC_004350.2:1988143-1989078 | protein_coding | 2.164220271  | 1.05567E-59 |
| SMU.2119  | NC_004350.2:1989078-1989743 | protein_coding | 1.320452229  | 7.99433E-14 |
| SMU.2120c | NC_004350.2:1989826-1990404 | protein_coding | -0.390270934 | 0.037916837 |
| SMU.2121c | NC_004350.2:1990430-1990717 | protein_coding | 0.363045071  | 0.429823666 |
| SMU.2123  | NC_004350.2:1990921-1991544 | protein_coding | 0.452713575  | 0.114101564 |
| SMU.2125  | NC_004350.2:1991626-1991910 | protein_coding | -0.282867662 | 0.368366834 |
| SMU.2126c | NC_004350.2:1991940-1992701 | protein_coding | 0.496992206  | 0.076902564 |
| SMU.2127  | NC_004350.2:1992887-1994263 | protein_coding | -2.328342649 | 2.71977E-92 |
| SMU.2128  | NC_004350.2:1994475-1996190 | protein_coding | -1.314082759 | 1.15046E-34 |
| SMU.2129c | NC_004350.2:1996343-1996684 | protein_coding | 1.639107164  | 0.000350268 |
| SMU.2130  | NC_004350.2:1996873-1997817 | protein_coding | -0.171374863 | 0.481394745 |
| SMU.2133c | NC_004350.2:1998008-2000512 | protein_coding | 3.147400857  | 3.01742E-75 |
| SMU.2134  | NC_004350.2:2000644-2001198 | protein_coding | -0.527001728 | 0.072463917 |
| SMU.2135c | NC_004350.2:2001240-2001851 | protein_coding | 0.442529693  | 0.002612335 |
| SMU.2137c | NC_004350.2:2002151-2002423 | protein_coding | 0.197125552  | 0.355372755 |
| SMU.2138  | NC_004350.2:2002437-2003801 | protein_coding | 0.65289467   | 2.24731E-08 |
| SMU.2139c | NC_004350.2:2003822-2004274 | protein_coding | 0.408457146  | 0.017851789 |
| SMU.2140c | NC_004350.2:2004276-2006249 | protein_coding | 1.254557045  | 2.02921E-25 |
| SMU.2141  | NC_004350.2:2006329-2008224 | protein_coding | 1.544725151  | 1.17783E-29 |
| SMU.2142  | NC_004350.2:2008351-2008983 | protein_coding | 0.433420047  | 0.007378497 |
| SMU.2143c | NC_004350.2:2009045-2010166 | protein_coding | 0.860096614  | 7.0756E-14  |

|           |                             |                |              |             |
|-----------|-----------------------------|----------------|--------------|-------------|
| SMU.2146c | NC_004350.2:2010535-2011140 | protein_coding | 2.919037967  | 5.43218E-48 |
| SMU.2147c | NC_004350.2:2011302-2012168 | protein_coding | 2.6825392    | 6.9999E-102 |
| SMU.2148c | NC_004350.2:2012357-2013151 | protein_coding | 0.21573229   | 0.247293538 |
| SMU.2149c | NC_004350.2:2013144-2013986 | protein_coding | 0.298925394  | 0.094673128 |
| SMU.2150c | NC_004350.2:2013962-2014804 | protein_coding | -0.27483102  | 0.025212223 |
| SMU.2151  | NC_004350.2:2014808-2015350 | protein_coding | -0.548254584 | 0.004116895 |
| SMU.2152c | NC_004350.2:2015362-2016339 | protein_coding | -0.22749376  | 0.094673128 |
| SMU.2153c | NC_004350.2:2016412-2017704 | protein_coding | -0.172672805 | 0.397032086 |
| SMU.2154c | NC_004350.2:2017706-2018953 | protein_coding | 0.15422267   | 0.404110456 |
| SMU.2155  | NC_004350.2:2019032-2019397 | protein_coding | -1.582218304 | 2.67445E-10 |
| SMU.2156  | NC_004350.2:2019400-2020491 | protein_coding | -1.16549695  | 4.75849E-20 |
| SMU.2157  | NC_004350.2:2020654-2022135 | protein_coding | 1.140172897  | 8.88891E-25 |
| SMU.2158c | NC_004350.2:2022292-2023314 | protein_coding | 1.122183462  | 9.90839E-11 |
| SMU.2159  | NC_004350.2:2023747-2025366 | protein_coding | 0.098394331  | 0.394638309 |
| SMU.2160  | NC_004350.2:2025406-2027979 | protein_coding | 1.155134711  | 8.53812E-11 |
| SMU_t63   | NC_004350.2:2028186-2028259 | tRNA           | 0.495202664  | 0.922599346 |
| SMU_t64   | NC_004350.2:2028265-2028336 | tRNA           | -0.488984952 | 0.7132393   |
| SMU_t65   | NC_004350.2:2028677-2028750 | tRNA           | 4.211717692  | 4.71684E-06 |
| SMU.2161c | NC_004350.2:2028771-2029433 | protein_coding | 0.018654207  | 0.949495232 |
| SMU.2162c | NC_004350.2:2029776-2030255 | protein_coding | -0.250968736 | 0.38279334  |
| SMU.2164  | NC_004350.2:2030461-2031669 | protein_coding | 0.697294359  | 1.62075E-10 |
| SMU.2165  | NC_004350.2:2032144-2032917 | protein_coding | 1.106991136  | 2.34245E-08 |
| NA        | NC_004350.2:99732-99869     | protein_coding | 1.107561061  | 0.048348468 |
| SMU.379   | NC_004350.2:359137-359274   | protein_coding | 2.735883931  | 0.178394789 |
| SMU.594   | NC_004350.2:552595-552750   | protein_coding | 0.783805505  | 0.351087736 |
| SMU.948   | NC_004350.2:897864-898034   | protein_coding | 1.158936505  | 2.71367E-05 |
| SMU.1256c | NC_004350.2:1189999-1190163 | protein_coding | -0.299413828 | 0.178394789 |
| SMU.1435c | NC_004350.2:1367788-1367949 | protein_coding | 2.043372496  | 0.003567483 |
| SMU.1459c | NC_004350.2:1388991-1389164 | protein_coding | -0.342263164 | 0.05181304  |
| SMU.1655c | NC_004350.2:1573919-1574059 | protein_coding | -1.307890149 | 3.69104E-12 |
| NA        | NC_004350.2:1661309-1662115 | pseudogene     | 3.135671092  | 2.8617E-138 |
| SMU.1832  | NC_004350.2:1727988-1728152 | protein_coding | 0.143095396  | 0.667690501 |
| SMU.1902c | NC_004350.2:1787777-1787920 | protein_coding | -4.421343901 | 1.4543E-220 |
| SMU.1908c | NC_004350.2:1790689-1790853 | protein_coding | -4.610315151 | 5.2011E-301 |
| SMU.2136c | NC_004350.2:2001955-2002131 | protein_coding | 0.539669166  | 0.022007151 |
| NA        | NC_004350.2:1518211-1518403 | pseudogene     | -0.291931718 | 0.365376357 |
| NA        | NC_004350.2:1563924-1564108 | pseudogene     | 2.22990247   | 0.040859871 |
| NA        | NC_004350.2:1924923-1925219 | protein_coding | -0.697693504 | 2.03273E-05 |
| NA        | NC_004350.2:95724-96461     | pseudogene     | 1.09232404   | 0.113903172 |
| SMU.108   | NC_004350.2:109280-109417   | protein_coding | -2.810136337 | 7.28139E-17 |
| NA        | NC_004350.2:213755-214100   | pseudogene     | 0.256089873  | 0.164720052 |
| NA        | NC_004350.2:214140-214355   | pseudogene     | 0.123127475  | 0.577896779 |
| NA        | NC_004350.2:293306-293469   | pseudogene     | 1.037674105  | 0.006148156 |
| NA        | NC_004350.2:596329-596652   | protein_coding | 0.176245071  | 0.700509033 |
| SMU.687c  | NC_004350.2:652698-652832   | protein_coding | 0.059813676  | 0.963547068 |
| NA        | NC_004350.2:1192125-1192241 | pseudogene     | 1.964419299  | 0.099181565 |
| NA        | NC_004350.2:1301468-1302033 | pseudogene     | 1.825247907  | 0.000412943 |
| NA        | NC_004350.2:1303605-1304160 | pseudogene     | 1.104420326  | 0.0029106   |
| NA        | NC_004350.2:1304343-1304747 | pseudogene     | -0.19894998  | 0.692686296 |
| NA        | NC_004350.2:1323964-1324194 | protein_coding | 5.358136071  | 3.24517E-49 |
| NA        | NC_004350.2:1395758-1396185 | pseudogene     | 0.090572083  | 0.830946301 |
| SMU.1762c | NC_004350.2:1666677-1667240 | protein_coding | 1.643860553  | 3.9613E-16  |
| NA        | NC_004350.2:1791293-1791505 | pseudogene     | 1.149821298  | 0.26701726  |
| NA        | NC_004350.2:1910203-1910541 | pseudogene     | -0.02663584  | 0.922599346 |
